# Supplementary material for: Multi-cohort genome-wide association analyses reveal loci underlying circulating liver enzyme levels in African-ancestry populations
Source: Research Square preprint supplement (doi:10.21203/rs.3.rs-6941679/v1), 2025-07-24
Supplement: Supplementary file 1 [file a6fb46e48142df6fa6fbe862.xlsx]

## Sheet: Supplementary Dataset 1
Title: Supplementary Table 1. Genomic risk loci identified by FUMA for GWAS of ALP, ALT, AST, and GGT
Description: Genomic loci identified via FUMA from GWAS of four liver enzymes (ALP, ALT, AST, GGT). Each row corresponds to a unique genomic locus, with lead SNPs and associated statistics shown.
Columns are: Phenotype, trait analyzed; GenomicLocus, numeric locus index assigned by FUMA; uniqID, unique variant identifier; rsID, dbSNP reference; chr, chromosome; pos, genomic position (base pair); p, P-value for the lead SNP; start/end, boundaries of the genomic locus; nSNPs, total number of SNPs in the locus after QC; nGWASSNPs, number of SNPs surpassing genome-wide significance in that loc…
Phenotype	GenomicLocus	uniqID	rsID	Chr	Pos	P	Start	End	nSNPs	nGWASSNPs	nIndSigSNPs	IndSigSNPs	nLeadSNPs	LeadSNPs
ALP	1	1:21870681:C:T	rs6666477	1	21870681	3e-16	21758572	21944413	158	127	36	rs34149768;rs1976403;rs190533210;rs567466164;rs1256342;rs6666477;rs16825571;rs1536934;rs66871026;rs17455136;rs60992762;rs115626047;rs150268202;rs561100847;rs6426716;rs59128456;rs3831947;rs2077499;rs138263018;1:21889143:A:G;rs1256332;rs12117249;rs75468497;rs61227130;rs829392;rs115870871;rs116749738;rs4654962;rs114552089;rs72659192;rs900486;rs66578725;rs1767445;rs4654973;rs11267885;rs145358087	14	rs34149768;rs1976403;rs190533210;rs567466164;rs6666477;rs60992762;rs561100847;rs6426716;1:21889143:A:G;rs75468497;rs114552089;rs72659192;rs900486;rs145358087
ALP	2	2:218399896:A:G	rs144252352	2	218399896	8.68718e-09	218399896	218431650	26	25	1	rs144252352	1	rs144252352
ALP	3	3:98431154:C:T	rs140363270	3	98431154	1.62792e-09	98431154	98550801	28	28	1	rs140363270	1	rs140363270
ALP	4	6:24398376:A:AT	rs537496263	6	24398376	1e-16	24106697	24845473	762	549	122	rs78296565;rs116043959;rs149354141;rs9348632;rs793847;rs807723;rs55841619;rs73726608;rs187373675;rs76477902;rs112128640;rs184442451;rs6456611;rs9885814;rs807721;rs793675;rs793710;rs793677;rs139338662;rs146859497;rs144639112;rs2295649;rs4305716;rs112012638;rs537436702;rs148690412;rs537496263;rs79803898;rs7750241;rs6922631;rs139430974;rs793712;rs7762593;rs2793437;rs138103622;6:24443473:C:G;rs114662…	37	rs78296565;rs9348632;rs793847;rs807723;rs55841619;rs76477902;rs9885814;rs793675;rs144639112;rs112012638;rs537496263;rs138103622;rs145510429;rs2487515;rs534566342;rs72447998;rs74412548;rs144662741;rs535822410;6:24463461:G:T;rs62400470;rs541171780;rs145536414;rs190055232;rs12183971;rs137862704;rs556694583;rs809419;rs35024450;rs145679477;rs535718990;rs72834991;rs73388287;rs10680679;rs75673582;rs1144…
ALP	5	7:80188082:A:G	rs58737329	7	80188082	1e-16	78964040	80989060	207	197	23	rs73706430;rs73709246;rs55728156;rs73708334;rs73711032;rs6971282;rs17154064;rs10216027;rs34193549;rs58737329;rs73711923;rs150389781;rs17154246;rs1830223;rs13233776;rs2886793;rs2272351;rs7357313;rs60839105;rs57792743;rs73712614;rs7779762;rs55910737	3	rs73706430;rs17154064;rs58737329
ALP	6	8:9178821:C:G	rs10099512	8	9178821	1e-16	8990577	9531302	174	162	21	rs189798;rs330088;rs11774353;rs11781511;rs10103137;rs6987057;rs2929308;rs13279173;rs10099512;rs11447452;rs4841134;rs35323122;rs28494016;rs4841135;rs11990096;8:9202838:A:G;rs9329187;rs36049565;rs330091;rs13265363;rs35599091	5	rs189798;rs330088;rs13279173;rs10099512;rs13265363
ALP	7	8:11616516:C:T	rs904018	8	11616516	8.78168e-10	11396856	11616516	2	2	2	rs2409784;rs904018	2	rs2409784;rs904018
ALP	8	8:91695044:A:G	rs78306989	8	91695044	1.29808e-11	91652740	91878131	41	41	2	rs78306989;rs28393021	1	rs78306989
ALP	9	9:136145471:A:G	rs582118	9	136145471	2e-16	136042624	136347059	259	180	30	rs114462664;rs115557473;rs114332938;rs78722996;rs11244035;rs3094373;rs559435168;rs9411370;rs8176704;rs150983833;rs144352526;rs116591358;rs76773262;rs9411465;rs9411365;rs7469795;rs1053878;rs8176736;rs8176714;rs8176689;rs630014;rs582118;rs633862;rs9411475;rs28844968;rs148088361;rs590488;rs78879538;rs141095008;rs28658542	9	rs114462664;rs11244035;rs559435168;rs9411465;rs7469795;rs582118;rs28844968;rs590488;rs78879538
ALP	10	10:65138910:G:T	rs7910927	10	65138910	1.205e-13	64862314	65365385	511	495	10	rs7910927;rs569555180;rs55739257;rs538711822;rs7898861;rs7895549;rs10822137;rs6479884;rs10995459;rs78094936	1	rs7910927
ALP	11	11:297970:C:T	rs3817640	11	297970	5.985e-13	296255	298316	4	4	1	rs3817640	1	rs3817640
ALP	12	13:21063974:C:T	rs9550655	13	21063974	8.58697e-10	21063974	21063974	1	1	1	rs9550655	1	rs9550655
ALP	13	16:72155237:C:T	rs11647069	16	72155237	3.28224e-10	72032377	72216452	73	66	1	rs11647069	1	rs11647069
ALP	14	17:7075351:A:C	rs116089734	17	7075351	1.30559e-08	7063519	7080508	25	20	4	rs11078668;rs62061426;rs116089734;rs114113707	3	rs11078668;rs62061426;rs116089734
ALP	15	19:5824438:G:GT	rs34182948	19	5824438	1e-16	5821632	5846229	66	48	10	rs3834829;rs8101385;rs34182948;rs778811;rs145275499;rs28362463;rs4807814;rs115287619;rs778987;rs5826905	3	rs3834829;rs34182948;rs778987
ALP	16	19:45417638:C:CTTCG	rs34954997	19	45417638	2.4e-15	45409283	45433327	15	14	7	rs34954997;rs5114;rs56131196;rs149782856;rs66626994;rs556325904;rs5112	2	rs34954997;rs556325904
ALP	17	19:49206603:C:T	rs281377	19	49206603	3e-16	49197058	49252679	88	85	13	rs58935689;rs648644;rs281395;rs150282181;rs281377;rs204248;rs629504;rs281393;rs439523;rs56066508;rs11667321;rs4002471;rs34801352	3	rs58935689;rs281377;rs4002471
ALT	1	7:86893089:A:G	rs137964419	7	86893089	1e-16	86607726	87767228	195	167	9	rs137964419;rs149641666;rs112525087;rs75642989;rs45536638;rs28381933;rs28381856;rs140557795;rs146367085	1	rs137964419
ALT	2	7:110842764:C:T	rs138797771	7	110842764	1.88025e-08	110842764	110842764	1	1	1	rs138797771	1	rs138797771
ALT	3	8:145724973:C:G	rs2721150	8	145724973	1e-16	145641328	146132300	404	311	42	rs7842602;rs116596209;rs115500585;rs116447027;rs7833404;rs114845297;rs2721150;rs4244612;rs873883;rs2620642;rs61493683;rs2721164;rs2620643;rs3757964;rs2620636;rs6599532;rs7014334;rs111445347;rs6989368;rs59464125;rs201794926;rs2721171;rs59286612;rs57198027;rs144808282;rs113647460;rs7845181;rs200774740;rs58298013;rs112321400;rs111510514;rs2620644;rs2620673;rs114996806;rs559278058;rs5895824;rs1127406…	12	rs7842602;rs115500585;rs7833404;rs2721150;rs2721171;rs59286612;rs57198027;rs144808282;rs559278058;rs5895824;rs2466400;rs115562868
ALT	4	11:93862020:C:T	rs4753126	11	93862020	2.33862e-08	93809618	93862020	7	7	1	rs4753126	1	rs4753126
ALT	5	22:44324730:C:T	rs738408	22	44324730	1.293e-13	44324727	44343626	57	56	1	rs738408	1	rs738408
AST	1	7:87012854:C:CAGG	rs576738951	7	87012854	1.56311e-08	86713446	87560155	55	55	1	rs576738951	1	rs576738951
AST	2	10:16583146:G:T	rs7086539	10	16583146	3.61513e-09	16567300	16583146	6	6	1	rs7086539	1	rs7086539
AST	3	10:17875816:A:T	rs56331215	10	17875816	2.4385e-12	17856043	17878009	6	6	4	rs374113136;rs56331215;rs35160301;rs538916895	3	rs374113136;rs56331215;rs35160301
AST	4	10:18138665:C:G	rs71497225	10	18138665	1.76634e-11	18138487	18138747	4	4	1	rs71497225	1	rs71497225
AST	5	22:44325516:G:T	rs12485100	22	44325516	6.602e-13	44324727	44345771	60	59	1	rs12485100	1	rs12485100
GGT	1	1:22026301:A:G	rs6675677	1	22026301	1.95564e-08	22013561	22040294	6	6	1	rs6675677	1	rs6675677
GGT	2	5:59400110:G:T	rs864064	5	59400110	1.47356e-08	59314289	59435756	55	55	2	rs864064;rs7736514	1	rs864064
GGT	3	22:24608818:T:TAAAA	rs199882393	22	24608818	1e-16	24110878	25353834	914	643	104	rs176156;rs1985047;rs7292435;rs5760271;rs5751820;rs113508912;rs8141133;rs34013488;rs561915935;rs199882393;rs561064019;rs114144044;rs116161010;rs146137617;rs116726573;rs146145622;rs114261160;rs184150509;rs115743663;rs7286769;rs5996676;rs5760296;rs5751868;rs4822499;rs11704820;rs6004097;rs7288113;rs5760268;rs35060391;rs183953441;rs552904509;rs60086309;rs73407128;rs80220397;rs76833164;rs181251778;rs1…	32	rs176156;rs113508912;rs199882393;rs7286769;rs5760268;rs183953441;rs80220397;rs17004921;rs73398395;rs67461685;rs4820595;rs9612662;rs6519520;rs145870090;rs139668897;rs5751909;rs57063182;rs73407118;rs131465;rs28363865;rs528103721;rs5751943;rs74825123;rs5751959;rs68019122;rs114351950;rs139969097;rs6004288;rs139632;rs139676;rs80246193;rs116013589
GGT	4	22:26422980:A:G	rs2236005	22	26422980	2.32028e-10	26421591	26440704	5	5	2	rs2236005;rs6004913	1	rs2236005

## Sheet: Supplementary Dataset 2
Supplementary Dataset 2. Lead SNPs for ALP, ALT, AST, and GGT identified by FUMA
Description: Independently significant SNPs for each locus, as determined by FUMA’s clumping approach, focusing on variants with lead signals for the four liver enzyme traits (ALP, ALT, AST, GGT).
Columns are: Phenotype, trait under study; No, index for the entry; GenomicLocus, numeric locus index; uniqID, unique variant identifier; rsID, dbSNP reference; chr, chromosome; pos, genomic position (base pair); p, P-value for the lead SNP; nIndSigSNPs, number of independently significant SNPs; IndSigSNPs, list of those SNPs at each locus.
Phenotype	No	GenomicLocus	uniqID	rsID	Chr	Pos	P	nIndSigSNPs	IndSigSNPs
ALP	1	1	1:21758572:T:TA	rs34149768	1	21758572	7.61937e-09	1	rs34149768
ALP	2	1	1:21766453:A:C	rs1976403	1	21766453	4.91967e-08	1	rs1976403
ALP	3	1	1:21845221:C:T	rs190533210	1	21845221	3.50781e-11	1	rs190533210
ALP	4	1	1:21857270:A:AT	rs567466164	1	21857270	3.9704e-12	2	rs567466164;rs1256342
ALP	5	1	1:21870681:C:T	rs6666477	1	21870681	3e-16	5	rs6666477;rs16825571;rs1536934;rs66871026;rs17455136
ALP	6	1	1:21871299:C:G	rs60992762	1	21871299	2.1769e-12	3	rs60992762;rs115626047;rs150268202
ALP	7	1	1:21871401:G:GT	rs561100847	1	21871401	6.02061e-09	1	rs561100847
ALP	8	1	1:21871798:G:T	rs6426716	1	21871798	8.3581e-12	7	rs6426716;rs16825571;rs1536934;rs59128456;rs3831947;rs2077499;rs138263018
ALP	9	1	1:21889143:A:G	1:21889143:A:G	1	21889143	2.647e-12	5	1:21889143:A:G;rs1256332;rs12117249;rs138263018;rs1256342
ALP	10	1	1:21892652:C:T	rs75468497	1	21892652	3e-16	6	rs75468497;rs61227130;rs829392;rs115870871;rs116749738;rs4654962
ALP	11	1	1:21904601:A:G	rs114552089	1	21904601	8.09857e-09	1	rs114552089
ALP	12	1	1:21906604:C:T	rs72659192	1	21906604	1.11763e-08	1	rs72659192
ALP	13	1	1:21938828:A:G	rs900486	1	21938828	1.5592e-11	9	rs900486;rs2077499;rs59128456;rs66578725;rs829392;rs3831947;rs1767445;rs4654973;rs11267885
ALP	14	1	1:21941988:A:G	rs145358087	1	21941988	6.67781e-09	1	rs145358087
ALP	15	2	2:218399896:A:G	rs144252352	2	218399896	8.68718e-09	1	rs144252352
ALP	16	3	3:98431154:C:T	rs140363270	3	98431154	1.62792e-09	1	rs140363270
ALP	17	4	6:24106697:A:G	rs78296565	6	24106697	3.5597e-12	3	rs78296565;rs116043959;rs149354141
ALP	18	4	6:24179504:C:T	rs9348632	6	24179504	4.95802e-11	1	rs9348632
ALP	19	4	6:24190598:C:T	rs793847	6	24190598	2.21358e-09	1	rs793847
ALP	20	4	6:24279187:A:C	rs807723	6	24279187	1.32662e-09	1	rs807723
ALP	21	4	6:24294069:A:G	rs55841619	6	24294069	8e-15	3	rs55841619;rs73726608;rs187373675
ALP	22	4	6:24328415:C:T	rs76477902	6	24328415	3.85691e-09	4	rs76477902;rs112128640;rs184442451;rs6456611
ALP	23	4	6:24344999:A:T	rs9885814	6	24344999	3.03809e-09	2	rs9885814;rs807721
ALP	24	4	6:24350421:A:C	rs793675	6	24350421	8e-16	5	rs793675;rs793710;rs793677;rs139338662;rs146859497
ALP	25	4	6:24389933:A:G	rs144639112	6	24389933	1.344e-13	5	rs144639112;rs2295649;rs116043959;rs149354141;rs4305716
ALP	26	4	6:24394959:C:T	rs112012638	6	24394959	4.0907e-12	4	rs112012638;rs537436702;rs148690412;rs807721
ALP	27	4	6:24398376:A:AT	rs537496263	6	24398376	1e-16	9	rs537496263;rs79803898;rs7750241;rs6922631;rs139430974;rs793712;rs7762593;rs2793437;rs793710
ALP	28	4	6:24404037:C:CATTT	rs138103622	6	24404037	5.556e-12	3	rs138103622;6:24443473:C:G;rs114662211
ALP	29	4	6:24433782:A:G	rs145510429	6	24433782	2.17e-14	3	rs145510429;rs116124968;rs6456611
ALP	30	4	6:24434939:A:G	rs2487515	6	24434939	1.5e-15	5	rs2487515;rs6922631;rs7763050;6:24443473:C:G;rs7762593
ALP	31	4	6:24440809:C:CA	rs534566342	6	24440809	9.07604e-10	1	rs534566342
ALP	32	4	6:24440951:T:TA	rs72447998	6	24440951	1.07183e-09	2	rs72447998;rs139430974
ALP	33	4	6:24448013:A:G	rs74412548	6	24448013	1e-16	8	rs74412548;rs183698722;rs2817191;rs116714495;rs116405676;rs533765931;rs79182099;rs9467148
ALP	34	4	6:24450534:A:G	rs144662741	6	24450534	3.25016e-11	1	rs144662741
ALP	35	4	6:24460967:A:AT	rs535822410	6	24460967	2.81986e-10	7	rs535822410;rs2793437;rs9393553;rs79803898;rs7750241;rs6922631;rs7762593
ALP	36	4	6:24463461:G:T	6:24463461:G:T	6	24463461	1.1082e-12	10	6:24463461:G:T;rs9348638;rs35751389;rs116124968;rs112128640;rs6456611;rs41271783;6:24443473:C:G;rs793712;rs2793443
ALP	37	4	6:24470974:A:G	rs62400470	6	24470974	4.3077e-12	2	rs62400470;rs9393559
ALP	38	4	6:24475947:A:G	rs541171780	6	24475947	6e-16	6	rs541171780;rs114662211;rs146279568;rs116140234;rs150417568;rs57218689
ALP	39	4	6:24478709:C:CCCAGCGTG	rs145536414	6	24478709	1e-16	15	rs145536414;rs2760139;rs147544691;rs114662211;rs9348638;rs35751389;rs73728140;rs73386193;rs10946700;rs7763050;6:24443473:C:G;rs793712;rs138373160;rs3846834;rs2793443
ALP	40	4	6:24497451:C:G	rs190055232	6	24497451	1.5665e-12	7	rs190055232;rs183698722;rs114195393;rs116101429;rs139873263;rs184442451;rs147716829
ALP	41	4	6:24499260:C:T	rs12183971	6	24499260	4.143e-13	7	rs12183971;rs116124968;rs2817191;rs150737270;rs115331888;rs9467125;rs114062501
ALP	42	4	6:24511839:C:T	rs137862704	6	24511839	5.8272e-12	4	rs137862704;rs148925683;rs73386193;rs115807633
ALP	43	4	6:24519983:G:GT	rs556694583	6	24519983	1.03287e-10	3	rs556694583;rs2744570;rs36013748
ALP	44	4	6:24526990:A:G	rs809419	6	24526990	1.1958e-10	8	rs809419;rs2267539;rs807533;rs9393559;rs147544691;rs2744570;rs36013748;rs35751389
ALP	45	4	6:24538694:A:AT	rs35024450	6	24538694	2e-16	9	rs35024450;rs3046066;rs2817191;rs35209953;rs2793443;rs183698722;rs2267539;rs73386193;rs2744603
ALP	46	4	6:24571420:A:G	rs145679477	6	24571420	1.71267e-08	1	rs145679477
ALP	47	4	6:24571606:C:CA	rs535718990	6	24571606	3.40584e-11	5	rs535718990;rs2744603;rs3046066;rs2817191;rs35209953
ALP	48	4	6:24575023:C:T	rs72834991	6	24575023	2.6e-15	2	rs72834991;rs11967803
ALP	49	4	6:24589236:C:G	rs73388287	6	24589236	6e-16	8	rs73388287;rs73727344;rs76950697;rs73388299;rs116405676;rs533765931;rs112476779;rs2817201
ALP	50	4	6:24590102:A:ATAACT	rs10680679	6	24590102	5.08534e-09	6	rs10680679;rs73388299;rs533765931;rs74712457;rs2817201;rs2760135
ALP	51	4	6:24615960:C:T	rs75673582	6	24615960	7e-16	6	rs75673582;rs78763240;rs112579598;rs73396410;rs79597656;rs77915956
ALP	52	4	6:24802222:A:C	rs114447550	6	24802222	1.3e-14	5	rs114447550;rs4298344;rs7743901;rs6934711;rs116589984
ALP	53	4	6:24830976:C:T	rs45619241	6	24830976	3.1589e-09	2	rs45619241;rs73396410
ALP	54	5	7:79034657:A:G	rs73706430	7	79034657	6.52935e-09	6	rs73706430;rs73709246;rs55728156;rs73708334;rs73711032;rs6971282
ALP	55	5	7:80144954:A:T	rs17154064	7	80144954	1.68296e-08	3	rs17154064;rs10216027;rs34193549
ALP	56	5	7:80188082:A:G	rs58737329	7	80188082	1e-16	21	rs58737329;rs73711923;rs150389781;rs17154246;rs1830223;rs13233776;rs2886793;rs2272351;rs7357313;rs60839105;rs57792743;rs73712614;rs73709246;rs55728156;rs73708334;rs73711032;rs6971282;rs7779762;rs55910737;rs10216027;rs34193549
ALP	57	6	8:8990577:A:G	rs189798	8	8990577	4.34615e-08	1	rs189798
ALP	58	6	8:9149746:C:T	rs330088	8	9149746	1.03757e-09	6	rs330088;rs11774353;rs11781511;rs10103137;rs6987057;rs2929308
ALP	59	6	8:9175433:C:T	rs13279173	8	9175433	3.16748e-08	1	rs13279173
ALP	60	6	8:9178821:C:G	rs10099512	8	9178821	1e-16	13	rs10099512;rs11447452;rs4841134;rs35323122;rs28494016;rs11781511;rs4841135;rs11990096;8:9202838:A:G;rs9329187;rs10103137;rs36049565;rs330091
ALP	61	6	8:9422926:G:T	rs13265363	8	9422926	1.01059e-08	3	rs13265363;rs35599091;rs6987057
ALP	62	7	8:11396856:A:C	rs2409784	8	11396856	1.03196e-08	1	rs2409784
ALP	63	7	8:11616516:C:T	rs904018	8	11616516	8.78168e-10	1	rs904018
ALP	64	8	8:91695044:A:G	rs78306989	8	91695044	1.29808e-11	2	rs78306989;rs28393021
ALP	65	9	9:136044299:C:T	rs114462664	9	136044299	3.54106e-08	4	rs114462664;rs115557473;rs114332938;rs78722996
ALP	66	9	9:136081319:C:T	rs11244035	9	136081319	1.06357e-11	2	rs11244035;rs3094373
ALP	67	9	9:136107100:A:C	rs559435168	9	136107100	3.6023e-12	7	rs559435168;rs9411370;rs8176704;rs150983833;rs144352526;rs116591358;rs76773262
ALP	68	9	9:136118180:A:G	rs9411465	9	136118180	6.9846e-10	6	rs9411465;rs9411365;rs9411370;rs78722996;rs115557473;rs114332938
ALP	69	9	9:136130893:C:T	rs7469795	9	136130893	3.80445e-08	6	rs7469795;rs1053878;rs8176736;rs8176714;rs8176689;rs630014
ALP	70	9	9:136145471:A:G	rs582118	9	136145471	2e-16	10	rs582118;rs630014;rs633862;rs9411365;rs9411370;rs9411475;rs1053878;rs8176736;rs8176714;rs8176689
ALP	71	9	9:136164427:A:G	rs28844968	9	136164427	2.42e-14	4	rs28844968;rs148088361;rs114332938;rs78722996
ALP	72	9	9:136178951:C:T	rs590488	9	136178951	1.00013e-10	1	rs590488
ALP	73	9	9:136326615:G:T	rs78879538	9	136326615	3.35e-14	5	rs78879538;rs141095008;rs144352526;rs28658542;rs150983833
ALP	74	10	10:65138910:G:T	rs7910927	10	65138910	1.205e-13	10	rs7910927;rs569555180;rs55739257;rs538711822;rs7898861;rs7895549;rs10822137;rs6479884;rs10995459;rs78094936
ALP	75	11	11:297970:C:T	rs3817640	11	297970	5.985e-13	1	rs3817640
ALP	76	12	13:21063974:C:T	rs9550655	13	21063974	8.58697e-10	1	rs9550655
ALP	77	13	16:72155237:C:T	rs11647069	16	72155237	3.28224e-10	1	rs11647069
ALP	78	14	17:7066372:A:C	rs11078668	17	7066372	1.80992e-08	1	rs11078668
ALP	79	14	17:7074125:A:G	rs62061426	17	7074125	2.12101e-08	1	rs62061426
ALP	80	14	17:7075351:A:C	rs116089734	17	7075351	1.30559e-08	2	rs116089734;rs114113707
ALP	81	15	19:5821632:G:GTTCATTCA	rs3834829	19	5821632	6.96652e-09	2	rs3834829;rs8101385
ALP	82	15	19:5824438:G:GT	rs34182948	19	5824438	1e-16	7	rs34182948;rs778811;rs145275499;rs8101385;rs28362463;rs4807814;rs115287619
ALP	83	15	19:5845974:A:G	rs778987	19	5845974	1.07587e-09	4	rs778987;rs778811;rs5826905;rs8101385
ALP	84	16	19:45417638:C:CTTCG	rs34954997	19	45417638	2.4e-15	5	rs34954997;rs5114;rs56131196;rs149782856;rs66626994
ALP	85	16	19:45433327:T:TA	rs556325904	19	45433327	9.62969e-09	2	rs556325904;rs5112
ALP	86	17	19:49203878:A:G	rs58935689	19	49203878	1.05242e-10	4	rs58935689;rs648644;rs281395;rs150282181
ALP	87	17	19:49206603:C:T	rs281377	19	49206603	3e-16	10	rs281377;rs648644;rs204248;rs281395;rs629504;rs281393;rs439523;rs56066508;rs11667321;rs150282181
ALP	88	17	19:49215095:C:T	rs4002471	19	49215095	4.20122e-09	3	rs4002471;rs281395;rs34801352
ALT	1	1	7:86893089:A:G	rs137964419	7	86893089	1e-16	9	rs137964419;rs149641666;rs112525087;rs75642989;rs45536638;rs28381933;rs28381856;rs140557795;rs146367085
ALT	6	3	8:145724973:C:G	rs2721150	8	145724973	1e-16	16	rs2721150;rs4244612;rs114845297;rs873883;rs2620642;rs61493683;rs2721164;rs2620643;rs3757964;rs2620636;rs6599532;rs7014334;rs111445347;rs6989368;rs59464125;rs201794926
ALT	10	3	8:145792978:A:G	rs144808282	8	145792978	1.5e-15	21	rs144808282;rs7014334;rs111445347;rs113647460;rs6989368;rs7845181;rs200774740;rs58298013;rs112321400;rs111510514;rs116596209;rs2620644;rs2620673;rs201794926;rs4244612;rs2620642;rs61493683;rs2721164;rs114996806;rs2620643;rs2620636
ALT	16	5	22:44324730:C:T	rs738408	22	44324730	1.29e-13	1	rs738408
ALT	14	3	8:146016320:A:G	rs115562868	8	146016320	2.45e-12	5	rs115562868;rs111510514;rs116596209;rs114996806;rs7845181
ALT	4	3	8:145679454:C:T	rs115500585	8	145679454	4.08e-12	2	rs115500585;rs116447027
ALT	8	3	8:145767355:G:GT	rs59286612	8	145767355	4.11e-12	5	rs59286612;rs3757964;rs6989368;rs201794926;rs4244612
ALT	9	3	8:145778473:A:T	rs57198027	8	145778473	2.89e-11	1	rs57198027
ALT	13	3	8:145949355:A:G	rs2466400	8	145949355	1.92e-10	11	rs2466400;rs112740657;rs58298013;rs112321400;rs34819842;rs111510514;rs1735403;rs80301280;rs114996806;rs7845181;rs200774740
ALT	12	3	8:145922700:C:CA	rs5895824	8	145922700	1.46e-09	6	rs5895824;rs112740657;rs112321400;rs34819842;rs111510514;rs1735403
ALT	3	3	8:145651888:A:G	rs7842602	8	145651888	2.8e-09	2	rs7842602;rs116596209
ALT	5	3	8:145699642:C:T	rs7833404	8	145699642	4.75e-09	2	rs7833404;rs114845297
ALT	11	3	8:145822789:C:T	rs559278058	8	145822789	5.21e-09	1	rs559278058
ALT	7	3	8:145756511:G:T	rs2721171	8	145756511	1.2e-08	2	rs2721171;rs114845297
ALT	2	2	7:110842764:C:T	rs138797771	7	110842764	1.88e-08	1	rs138797771
ALT	15	4	11:93862020:C:T	rs4753126	11	93862020	2.34e-08	1	rs4753126
AST	1	1	7:87012854:C:CAGG	rs576738951	7	87012854	1.56311e-08	1	rs576738951
AST	2	2	10:16583146:G:T	rs7086539	10	16583146	3.61513e-09	1	rs7086539
AST	3	3	10:17875762:A:G	rs374113136	10	17875762	3.4252e-12	1	rs374113136
AST	4	3	10:17875816:A:T	rs56331215	10	17875816	2.4385e-12	1	rs56331215
AST	5	3	10:17877539:A:C	rs35160301	10	17877539	3.0141e-12	2	rs35160301;rs538916895
AST	6	4	10:18138665:C:G	rs71497225	10	18138665	1.76634e-11	1	rs71497225
AST	7	5	22:44325516:G:T	rs12485100	22	44325516	6.602e-13	1	rs12485100
GGT	1	1	1:22026301:A:G	rs6675677	1	22026301	1.95564e-08	1	rs6675677
GGT	2	2	5:59400110:G:T	rs864064	5	59400110	1.47356e-08	2	rs864064;rs7736514
GGT	3	3	22:24500866:C:G	rs176156	22	24500866	7.44666e-09	5	rs176156;rs1985047;rs7292435;rs5760271;rs5751820
GGT	4	3	22:24599528:A:G	rs113508912	22	24599528	1.98544e-08	5	rs113508912;rs8141133;rs34013488;rs561915935;rs1985047
GGT	5	3	22:24608818:T:TAAAA	rs199882393	22	24608818	1e-16	12	rs199882393;rs561915935;rs561064019;rs114144044;rs116161010;rs146137617;rs116726573;rs146145622;rs114261160;rs184150509;rs115743663;rs34013488
GGT	6	3	22:24619207:C:T	rs7286769	22	24619207	3e-16	11	rs7286769;rs5996676;rs5760271;rs5751820;rs5760296;rs5751868;rs4822499;rs11704820;rs7292435;rs6004097;rs7288113
GGT	7	3	22:24625659:A:T	rs5760268	22	24625659	1.12234e-09	9	rs5760268;rs5996676;rs35060391;rs5751820;rs561915935;rs561064019;rs114144044;rs34013488;rs7288113
GGT	8	3	22:24768660:A:G	rs183953441	22	24768660	1e-16	7	rs183953441;rs552904509;rs4822499;rs60086309;rs73407128;rs5760271;rs5760296
GGT	9	3	22:24790373:A:G	rs80220397	22	24790373	1.637e-13	9	rs80220397;rs76833164;rs181251778;rs191811019;rs80213578;rs192151722;rs146384190;rs115248637;rs8141133
GGT	10	3	22:24840676:C:T	rs17004921	22	24840676	8.62e-14	9	rs17004921;rs4822499;rs3788372;rs11704820;rs35060391;rs561915935;rs561064019;rs5751868;rs66676926
GGT	11	3	22:24910348:A:G	rs73398395	22	24910348	1.03232e-08	2	rs73398395;rs59075783
GGT	12	3	22:24913614:G:T	rs67461685	22	24913614	1.3754e-08	3	rs67461685;rs114144044;rs116161010
GGT	13	3	22:24948172:A:G	rs4820595	22	24948172	4e-16	5	rs4820595;rs9624493;rs28461882;rs568301801;rs7292105
GGT	14	3	22:24982522:A:T	rs9612662	22	24982522	1.02633e-09	3	rs9612662;rs5760500;rs5760516
GGT	15	3	22:24991895:A:G	rs6519520	22	24991895	2.2e-15	5	rs6519520;rs5760500;rs389004;rs5760516;rs56017319
GGT	16	3	22:24994321:A:C	rs145870090	22	24994321	5.2453e-12	1	rs145870090
GGT	17	3	22:25005033:C:T	rs139668897	22	25005033	5e-16	4	rs139668897;rs577562425;rs75885965;rs7292010
GGT	18	3	22:25013346:A:G	rs5751909	22	25013346	2.0102e-11	3	rs5751909;rs146137617;rs2017188
GGT	19	3	22:25023670:C:T	rs57063182	22	25023670	2e-16	5	rs57063182;rs59075783;rs191811019;rs76833164;rs2076999
GGT	20	3	22:25029844:A:T	rs73407118	22	25029844	1.01e-14	6	rs73407118;rs73407128;rs201397312;rs146137617;rs200148140;rs2017188
GGT	21	3	22:25064964:C:G	rs131465	22	25064964	2.25751e-11	8	rs131465;rs9620414;rs2330896;rs2330906;rs5760581;rs389004;rs5760516;rs5996732
GGT	22	3	22:25069482:C:T	rs28363865	22	25069482	1e-16	12	rs28363865;rs3906690;rs2330906;rs5751934;rs5760581;rs5751949;rs60086309;rs73407128;rs5996732;rs200148140;rs9620414;rs139934291
GGT	23	3	22:25072677:A:C	rs528103721	22	25072677	2.00645e-08	1	rs528103721
GGT	24	3	22:25087268:A:G	rs5751943	22	25087268	1.1829e-12	4	rs5751943;rs2330906;rs11413243;rs5760581
GGT	25	3	22:25092210:G:T	rs74825123	22	25092210	4.41211e-08	2	rs74825123;rs11413243
GGT	26	3	22:25123669:A:G	rs5751959	22	25123669	3.11e-14	4	rs5751959;rs5751949;rs539789455;rs131480
GGT	27	3	22:25146457:T:TC	rs68019122	22	25146457	4.88029e-10	3	rs68019122;rs116726573;rs146145622
GGT	28	3	22:25165905:C:T	rs114351950	22	25165905	2.511e-13	4	rs114351950;rs146384190;rs191811019;rs16978837
GGT	29	3	22:25178967:C:G	rs139969097	22	25178967	2.59328e-11	1	rs139969097
GGT	30	3	22:25202560:A:C	rs6004288	22	25202560	4.04043e-11	4	rs6004288;rs1546934;rs140576520;rs6004287
GGT	31	3	22:25225769:A:G	rs139632	22	25225769	3.10474e-08	2	rs139632;rs6004301
GGT	32	3	22:25248765:A:G	rs139676	22	25248765	1.37954e-10	4	rs139676;rs139678;rs13054678;rs5752014
GGT	33	3	22:25278570:A:G	rs80246193	22	25278570	3.31135e-10	4	rs80246193;rs60086309;rs6004301;rs139678
GGT	34	3	22:25284040:C:G	rs116013589	22	25284040	2.05403e-08	4	rs116013589;rs184150509;rs116726573;rs114261160
GGT	35	4	22:26422980:A:G	rs2236005	22	26422980	2.32028e-10	2	rs2236005;rs6004913

## Sheet: Supplementary Dataset 3
Supplementary Dataset 3. TMEM64 associations from Harmonizome 3.0 (https://maayanlab.cloud/Harmonizome/)
Description: TMEM64 associations obtained from Harmonizome 3.0, highlighting various biological and functional categories, as well as gene expression and dependency data.
Columns are: association, biological/functional annotation; dataset, resource from which the association was derived (e.g., Roadmap Epigenomics, COSMIC, Allen Brain Atlas, DepMap CRISPR); threshold value, significance or cutoff parameter; standardized value, a normalized metric of the observed association, if applicable.
Association	Dataset	Threshold value	Standardized value
H3K27ac_Brain Mid Frontal Lobe	Roadmap Epigenomics Histone Modification Site Profiles	1	null
NCI-H510A	COSMIC Cell Line Gene CNV Profiles	1	2.06989
Declive (VI), molecular layer	Allen Brain Atlas Adult Mouse Brain Tissue Gene Expression Profiles	1	1.98513
KINGS1	DepMap CRISPR Gene Dependency	1	2.63795
H3K4me3_WERI-Rb-1_hg19_1	ENCODE Histone Modification Site Profiles	1	null
Parecoxib	DeepCoverMOA Drug Mechanisms of Action	1	0.27
CA1 field, right	Allen Brain Atlas Adult Human Brain Tissue Gene Expression Profiles	-1	-0.9347
hsa-miR-513b	TargetScan Predicted Nonconserved microRNA Targets	1	1.13535
GATA2_01_61	KnockTF Gene Expression Profiles with Transcription Factor Perturbations	1	2.63341
Osteoporosis	DisGeNET Gene-Disease Associations	1	null
hsa-miR-548ah	TargetScan Predicted Conserved microRNA Targets	1	0.165047
GTEX-PLZ4-0006-SM-2S1NY	GTEx Tissue Sample Gene Expression Profiles	-1	-1.56791
NR3C1-27076634-BEAS2B-HUMAN-LUNG-INFLAMMATION	ChEA Transcription Factor Targets 2022	1	null
Mental Disorders	CTD Gene-Disease Associations	1	1.21435
FOXA2_A549_hg19_2	ENCODE Transcription Factor Binding Site Profiles	1	null
Prostate adenocarcinoma_PRAD_TCGA-VP-A87B-01A-11R-A352-07	TCGA Signatures of Differentially Expressed Genes for Tumors	1	null
MAX_H1-hESC_hg19_3	ENCODE Transcription Factor Binding Site Profiles	1	null
GTEX-XGQ4-0005-SM-4AT5U	GTEx Tissue Sample Gene Expression Profiles	-1	-1.69698
HCFC1_CH12.LX_mm9_1	ENCODE Transcription Factor Binding Site Profiles	1	null
JUND_MCF-7_hg19_1	ENCODE Transcription Factor Binding Site Profiles	1	null
POLR2AphosphoS5_HCT116_hg19_1	ENCODE Transcription Factor Binding Site Profiles	1	null
RUNX3	ENCODE Transcription Factor Targets	1	null
STK841699	DeepCoverMOA Drug Mechanisms of Action	1	1.25
NCI-H2795	Klijn et al., Nat. Biotechnol., 2015 Cell Line Gene CNV Profiles	1	0.865115
increased bone mineral content	MPO Gene-Phenotype Associations	1	null
abnormal blood cell morphology/development	MPO Gene-Phenotype Associations	1	null
superficial stratum of PcPV	Allen Brain Atlas Adult Mouse Brain Tissue Gene Expression Profiles	1	1.31286
MCAS	Klijn et al., Nat. Biotechnol., 2015 Cell Line Gene Expression Profiles	-1	-0.86958
GTEX-OHPL-1326-SM-3MJGG	GTEx Tissue Sample Gene Expression Profiles	1	1.20672
r2 part of vestibular nucleus Y	Allen Brain Atlas Adult Mouse Brain Tissue Gene Expression Profiles	-1	-1.02746
r3 roof plate	Allen Brain Atlas Adult Mouse Brain Tissue Gene Expression Profiles	-1	-1.56353
H3K4me3_A549_hg19_4	ENCODE Histone Modification Site Profiles	1	null
testis	TISSUES Curated Tissue Protein Expression Evidence Scores	1	null
abnormal osteoblast morphology	MPO Gene-Phenotype Associations	1	null
Skin Cutaneous Melanoma_SKCM_TCGA-RP-A693-06A-13R-A311-07	TCGA Signatures of Differentially Expressed Genes for Tumors	1	null
E2F6	ENCODE Transcription Factor Targets	1	null
GTEX-T5JW-1726-SM-3GADN	GTEx Tissue Sample Gene Expression Profiles	1	0.836921
hsa-miR-4511	TargetScan Predicted Conserved microRNA Targets	1	0.047969
KDM1A	ENCODE Transcription Factor Targets	1	null
hsa-miR-641	TargetScan Predicted Nonconserved microRNA Targets	1	1.07142
superficial stratum of r4Tr	Allen Brain Atlas Adult Mouse Brain Tissue Gene Expression Profiles	-1	-1.56816
TBL1XR1	ENCODE Transcription Factor Targets	1	null
GTEX-VJYA-1326-SM-3GIJC	GTEx Tissue Sample Gene Expression Profiles	1	1.22122
KYSE-180	Klijn et al., Nat. Biotechnol., 2015 Cell Line Gene CNV Profiles	1	0.831087
iPS-18 Cells	Roadmap Epigenomics Cell and Tissue DNA Methylation Profiles	-1	-1.21751
H3K23me2_H9	Roadmap Epigenomics Histone Modification Site Profiles	1	null
mRNA_SOX2_19796622	ESCAPE Omics Signatures of Genes and Proteins for Stem Cells	1	null
GTEX-WHSE-3026-SM-3P5ZH	GTEx Tissue Sample Gene Expression Profiles	-1	-0.912156
rt4	HPA Cell Line Gene Expression Profiles	1	1.41518
TAF1	ENCODE Transcription Factor Targets	1	null
abnormal bone volume	MPO Gene-Phenotype Associations	1	null
Lung adenocarcinoma_LUAD_TCGA-73-4676-11A-01R-1755-07	TCGA Signatures of Differentially Expressed Genes for Tumors	1	null
Pontine gray	Allen Brain Atlas Adult Mouse Brain Tissue Gene Expression Profiles	-1	-1.30192
GK_KO_GDS2610_162_mouse_Brown adipose tissue	GEO Signatures of Differentially Expressed Genes for Gene Perturbations	-1	null
H3K27ac_astrocyte_hg19_1	ENCODE Histone Modification Site Profiles	1	null
H3K4me3_BE2C_hg19_1	ENCODE Histone Modification Site Profiles	1	null
H3K27me3_NT2-D1_hg19_1	ENCODE Transcription Factor Binding Site Profiles	1	null
Sarcoma_SARC_TCGA-DX-A6Z2-01A-12R-A36F-07	TCGA Signatures of Differentially Expressed Genes for Tumors	1	null
USF2	ENCODE Transcription Factor Targets	1	null
MYBL2	ENCODE Transcription Factor Targets	1	null
RAGE_knockout_267_GDS3755	GEO Signatures of Differentially Expressed Genes for Kinase Perturbations	-1	-1.95787
CEBPD-21427703-3T3-L1-MOUSE	ChEA Transcription Factor Targets 2022	1	null
duodenum	HPA Tissue Protein Expression Profiles	1	0.919228
GTEX-O5YT-2126-SM-3MJGD	GTEx Tissue Sample Gene Expression Profiles	1	1.08764
VIIIB, right, paravermis	Allen Brain Atlas Adult Human Brain Tissue Gene Expression Profiles	-1	-1.10887
regulation of tissue remodeling	GO Biological Process Annotations 2015	1	null
frontal pole, right, inferior aspect	Allen Brain Atlas Adult Human Brain Tissue Gene Expression Profiles	-1	-0.911152
19218430-TableS3	GeneSigDB Published Gene Signatures	1	null
GTEX-R55G-0126-SM-48FDS	GTEx Tissue Sample Gene Expression Profiles	1	0.876776
OVMANA	Klijn et al., Nat. Biotechnol., 2015 Cell Line Gene Expression Profiles	1	1.93166
abnormal skeleton development	MPO Gene-Phenotype Associations	1	null
HCC2157	COSMIC Cell Line Gene CNV Profiles	1	2.06989
H2AFZ_osteoblast_hg19_1	ENCODE Transcription Factor Binding Site Profiles	1	null
testis	HPA Tissue Protein Expression Profiles	1	0.919228
Lung adenocarcinoma_LUAD_TCGA-49-4490-11A-01R-1858-07	TCGA Signatures of Differentially Expressed Genes for Tumors	1	null
outer SZ in ventromedial extrastriate cortex	Allen Brain Atlas Prenatal Human Brain Tissue Gene Expression Profiles	-1	-1.16142
GATA4-21415370-HL-1-MOUSE	ChEA Transcription Factor Binding Site Profiles	1	null
Kidney renal clear cell carcinoma_KIRC_TCGA-B0-4841-01A-01R-1277-07	TCGA Signatures of Differentially Expressed Genes for Tumors	1	null
CTCF_fibroblast of skin of abdomen_hg19_2	ENCODE Transcription Factor Binding Site Profiles	1	null
CTCF_fibroblast of lung_hg19_1	ENCODE Transcription Factor Binding Site Profiles	1	null
isthmic alar plate	Allen Brain Atlas Adult Mouse Brain Tissue Gene Expression Profiles	1	1.32381
PRDM5	ChEA Transcription Factor Targets	1	null
mRNA_DLX3_19796622	ESCAPE Omics Signatures of Genes and Proteins for Stem Cells	1	null
K029AX	CCLE Cell Line Gene Expression Profiles	1	1.40118
SNU216	CCLE Cell Line Gene CNV Profiles	1	1.57056
r4 part of medial pontine nuclei	Allen Brain Atlas Adult Mouse Brain Tissue Gene Expression Profiles	-1	-1.45685
H2AFZ_H1-hESC_hg19_1	ENCODE Transcription Factor Binding Site Profiles	1	null
Brain Lower Grade Glioma_LGG_TCGA-VV-A86M-01A-11R-A36H-07	TCGA Signatures of Differentially Expressed Genes for Tumors	1	null
hsa-miR-522	TargetScan Predicted Conserved microRNA Targets	1	0.075559
TAL1_K562_hg19_1	ENCODE Transcription Factor Binding Site Profiles	1	null
Kidney renal papillary cell carcinoma_KIRP_TCGA-BQ-5884-01A-11R-1592-07	TCGA Signatures of Differentially Expressed Genes for Tumors	1	null
GTEX-TSE9-0626-SM-3DB8B	GTEx Tissue Sample Gene Expression Profiles	1	0.833086
Hyperplasia	CTD Gene-Disease Associations	1	1.43482
H3K4me3_mammary epithelial cell_hg19_3	ENCODE Histone Modification Site Profiles	1	null
Lung adenocarcinoma_LUAD_TCGA-49-6744-11A-01R-1858-07	TCGA Signatures of Differentially Expressed Genes for Tumors	1	null
H3K27me3_H1-hESC_hg19_1	ENCODE Transcription Factor Binding Site Profiles	1	null
positive regulation of cell differentiation	GO Biological Process Annotations 2023	1	null
Parasubiculum, layer 1	Allen Brain Atlas Adult Mouse Brain Tissue Gene Expression Profiles	1	1.0184
GTEX-XUJ4-2626-SM-4BOQ3	GTEx Tissue Sample Gene Expression Profiles	-1	-0.894636
H3K4ac_IMR90	Roadmap Epigenomics Histone Modification Site Profiles	1	null
hsa-miR-4682	TargetScan Predicted Conserved microRNA Targets	1	0.632343
TBP	ENCODE Transcription Factor Targets	1	null
CTCF_fibroblast of foreskin _hg19_2	ENCODE Transcription Factor Binding Site Profiles	1	null
tardbp_19910924_hek293e_lof_human_gpl570_gds3730	GEO Signatures of Differentially Expressed Genes for Transcription Factor Perturbations	1	0.502514
MAFF_HepG2_hg19_1	ENCODE Transcription Factor Binding Site Profiles	1	null
hsa-miR-520d-5p	TargetScan Predicted Conserved microRNA Targets	1	0.056784
SG in rostral entorhinal cortex	Allen Brain Atlas Prenatal Human Brain Tissue Gene Expression Profiles	1	1.66917
MYC-19030024-MESC-mouse	ChEA Transcription Factor Binding Site Profiles	1	null
SIN3A_A549_hg19_1	ENCODE Transcription Factor Binding Site Profiles	1	null
GTEX-T6MN-0008-SM-4DM7H	GTEx Tissue Sample Gene Expression Profiles	1	1.53742
GTEX-VUSG-0008-SM-4KL24	GTEx Tissue Sample Gene Expression Profiles	1	2.01875
GTEX-SIU7-0006-SM-2XCE6	GTEx Tissue Sample Gene Expression Profiles	-1	-1.19009
NCI-H1568	Klijn et al., Nat. Biotechnol., 2015 Cell Line Gene CNV Profiles	1	1.23286
KLF4-18555785-MESC-mouse	ChEA Transcription Factor Binding Site Profiles	1	null
H3K23ac_H1	Roadmap Epigenomics Histone Modification Site Profiles	1	null
LS 180	Klijn et al., Nat. Biotechnol., 2015 Cell Line Gene Mutation Profiles	1	null
CTCF_HepG2_hg19_1	ENCODE Transcription Factor Binding Site Profiles	1	null
hsa-miR-320b	TargetScan Predicted Conserved microRNA Targets	1	0.419947
Crus II, right, lateral hemisphere	Allen Brain Atlas Adult Human Brain Tissue Gene Expression Profiles	-1	-1.27863
positive regulation of tissue remodeling	GO Biological Process Annotations 2015	1	null
CTCF_choroid plexus epithelial cell_hg19_2	ENCODE Transcription Factor Binding Site Profiles	1	null
cerebellar cortex_21 pcw_M_12886	Allen Brain Atlas Developing Human Brain Tissue Gene Expression Profiles by RNA-seq	-1	-1.87565
17724462-TableS2	GeneSigDB Published Gene Signatures	1	null
mantle zone of m2ADL	Allen Brain Atlas Adult Mouse Brain Tissue Gene Expression Profiles	1	1.7517
inferolateral temporal cortex (area TEv, area 20)_21 yrs_F_13057	Allen Brain Atlas Developing Human Brain Tissue Gene Expression Profiles by RNA-seq	1	0.969965
SUDHL6	CCLE Cell Line Gene Expression Profiles	1	1.92014
hsa-miR-3941	TargetScan Predicted Conserved microRNA Targets	1	0.107229
SIN3A_H1-hESC_hg19_1	ENCODE Transcription Factor Binding Site Profiles	1	null
MAZ_CH12.LX_mm9_1	ENCODE Transcription Factor Binding Site Profiles	1	null
regulation of cytosolic calcium ion concentration	GO Biological Process Annotations 2023	1	null
posteroventral (inferior) parietal cortex_13 pcw_M_12888	Allen Brain Atlas Developing Human Brain Tissue Gene Expression Profiles by RNA-seq	-1	-0.876062
Mianserin	DeepCoverMOA Drug Mechanisms of Action	1	0.39
Ventral posterolateral nucleus of the thalamus	Allen Brain Atlas Adult Mouse Brain Tissue Gene Expression Profiles	-1	-1.38055
SIN3A_MCF-7_hg19_2	ENCODE Transcription Factor Binding Site Profiles	1	null
TRAM-34	DeepCoverMOA Drug Mechanisms of Action	1	0.26
RAD21_A549_hg19_1	ENCODE Transcription Factor Binding Site Profiles	1	null
GTEX-OXRK-0006-SM-2HML1	GTEx Tissue Sample Gene Expression Profiles	-1	-1.49886
NCI-H522	Klijn et al., Nat. Biotechnol., 2015 Cell Line Gene CNV Profiles	-1	-2.17648
Bladder Urothelial Carcinoma_BLCA_TCGA-DK-A1AC-01A-11R-A13Y-07	TCGA Signatures of Differentially Expressed Genes for Tumors	1	null
Bladder Urothelial Carcinoma_BLCA_TCGA-ZF-A9R4-01A-11R-A38B-07	TCGA Signatures of Differentially Expressed Genes for Tumors	1	null
P63-26484246-CHIP-SEQ-KERATINOCYTES-HUMAN	ChEA Transcription Factor Targets 2022	1	null
H3K4me1_G1E_mm9_2	ENCODE Histone Modification Site Profiles	1	null
female reproductive gland	TISSUES Curated Tissue Protein Expression Evidence Scores	1	null
GTEX-WFG7-0326-SM-3GILI	GTEx Tissue Sample Gene Expression Profiles	1	1.65951
gland	TISSUES Curated Tissue Protein Expression Evidence Scores	1	null
H3K4me3_olfactory bulb_mm9_1	ENCODE Histone Modification Site Profiles	1	null
H3K4me3_MCF-7_hg19_1	ENCODE Histone Modification Site Profiles	1	null
HT1197	CCLE Cell Line Gene CNV Profiles	1	1.73634
MAFF	ENCODE Transcription Factor Targets	1	null
hsa-miR-4782-5p	TargetScan Predicted Conserved microRNA Targets	1	0.241055
animal	TISSUES Text-mining Tissue Protein Expression Evidence Scores	1	0.050892
MAFK_HepG2_hg19_1	ENCODE Transcription Factor Binding Site Profiles	1	null
fertilizedegg	BioGPS Mouse Cell Type and Tissue Gene Expression Profiles	-1	-1.25597
skeletalmuscle_e	HPA Tissue Sample Gene Expression Profiles	-1	-1.10267
OPM-2	Klijn et al., Nat. Biotechnol., 2015 Cell Line Gene CNV Profiles	-1	-1.33651
Prelimbic area, layer 1	Allen Brain Atlas Adult Mouse Brain Tissue Gene Expression Profiles	1	1.39277
H3K4me3_fibroblast of villous mesenchyme_hg19_2	ENCODE Histone Modification Site Profiles	1	null
superficial stratum of m1AL	Allen Brain Atlas Adult Mouse Brain Tissue Gene Expression Profiles	1	1.66547
GTEX-OIZH-0726-SM-3NB1I	GTEx Tissue Sample Gene Expression Profiles	1	1.70249
yy1_20215434_hela_lof_human_gpl570_gds3788	GEO Signatures of Differentially Expressed Genes for Transcription Factor Perturbations	-1	-0.454276
cell part	GO Cellular Component Annotations 2015	1	null
BI 2536	DeepCoverMOA Drug Mechanisms of Action	1	2.17
GTEX-RU1J-0008-SM-46MV9	GTEx Tissue Sample Gene Expression Profiles	1	1.01334
RAD21_SK-N-SH_hg19_2	ENCODE Transcription Factor Binding Site Profiles	1	null
H3K4me1_placenta_mm9_1	ENCODE Histone Modification Site Profiles	1	null
RAD21_H1-hESC_hg19_1	ENCODE Transcription Factor Binding Site Profiles	1	null
POLR2AphosphoS5_SK-N-MC_hg19_1	ENCODE Transcription Factor Binding Site Profiles	1	null
POLR2A_K562_hg19_7	ENCODE Transcription Factor Binding Site Profiles	1	null
hsa-miR-19a	TargetScan Predicted Conserved microRNA Targets	1	0.37496
male reproductive system	TISSUES Curated Tissue Protein Expression Evidence Scores	1	null
FOXO3	ChEA Transcription Factor Targets	1	null
FTI-277	DeepCoverMOA Drug Mechanisms of Action	-1	-0.46
GTEX-OIZH-1326-SM-3NB1H	GTEx Tissue Sample Gene Expression Profiles	1	1.12835
CTCF_A549_hg19_4	ENCODE Transcription Factor Binding Site Profiles	1	null
GTEX-X261-0011-R6B-SM-4E3J8	GTEx Tissue Sample Gene Expression Profiles	-1	-1.15766
posterior (caudal) superior temporal cortex (area 22c)_16 pcw_M_12287	Allen Brain Atlas Developing Human Brain Tissue Gene Expression Profiles by RNA-seq	-1	-1.09915
Acute Myeloid Leukemia_LAML_TCGA-AB-2984-03A-01T-0734-13	TCGA Signatures of Differentially Expressed Genes for Tumors	1	null
HCC2998	COSMIC Cell Line Gene Mutation Profiles	1	null
H3K4me3_SK-N-SH_hg19_1	ENCODE Histone Modification Site Profiles	1	null
GTEX-UPJH-0526-SM-4IHK8	GTEx Tissue Sample Gene Expression Profiles	-1	-0.971166
MAX_ECC-1_hg19_1	ENCODE Transcription Factor Binding Site Profiles	1	null
negative regulation of canonical Wnt signaling pathway	GO Biological Process Annotations 2025	1	null
SW982	DepMap CRISPR Gene Dependency	1	4.20059
GTEX-OHPM-2626-SM-33HC5	GTEx Tissue Sample Gene Expression Profiles	1	2.51504
GTEX-REY6-0005-SM-2TF54	GTEx Tissue Sample Gene Expression Profiles	-1	-1.03291
abnormal bone mineral content	MPO Gene-Phenotype Associations	1	null
H3K4me3_MEL cell line_mm9_2	ENCODE Histone Modification Site Profiles	1	null
MAX_K562_hg19_2	ENCODE Transcription Factor Binding Site Profiles	1	null
STAT5A	ENCODE Transcription Factor Targets	1	null
SIRT6	ENCODE Transcription Factor Targets	1	null
CAL-12T	Klijn et al., Nat. Biotechnol., 2015 Cell Line Gene Expression Profiles	-1	-1.07197
SETDB1-19884255-MESCS-MOUSE	ChEA Transcription Factor Targets 2022	1	null
NCIH510	CCLE Cell Line Gene CNV Profiles	1	3.26115
inorganic ion homeostasis	GO Biological Process Annotations 2015	1	null
MXI1_CH12.LX_mm9_1	ENCODE Transcription Factor Binding Site Profiles	1	null
GTEX-XUW1-0005-SM-4BOQ7	GTEx Tissue Sample Gene Expression Profiles	-1	-0.985605
Bladder Urothelial Carcinoma_BLCA_TCGA-SY-A9G0-01A-12R-A38B-07	TCGA Signatures of Differentially Expressed Genes for Tumors	1	null
PML_GM12878_hg19_1	ENCODE Transcription Factor Binding Site Profiles	1	null
hsa-miR-211	TargetScan Predicted Conserved microRNA Targets	1	0.517189
female reproductive system	TISSUES Curated Tissue Protein Expression Evidence Scores	1	null
PU.1-20513432-MACROPHAGES-MOUSE	ChEA Transcription Factor Targets 2022	1	null
SW403	CCLE Cell Line Gene Expression Profiles	-1	-1.69326
GTEX-SIU8-0626-SM-2XCDN	GTEx Tissue Sample Gene Expression Profiles	1	0.878098
TCF7L2_HeLa-S3_hg19_1	ENCODE Transcription Factor Binding Site Profiles	1	null
H3K27ac_H1-hESC_hg19_1	ENCODE Histone Modification Site Profiles	1	null
PF-04620110	DeepCoverMOA Drug Mechanisms of Action	-1	-0.4
ESR1-21235772-MCF-7-HUMAN	ChEA Transcription Factor Binding Site Profiles	1	null
medial mammillary nucleus	Allen Brain Atlas Prenatal Human Brain Tissue Gene Expression Profiles	1	1.03032
abnormal osteoclast differentiation	MGI Mouse Phenotype Associations 2023	1	null
dorsolateral part of m2A	Allen Brain Atlas Adult Mouse Brain Tissue Gene Expression Profiles	1	1.7517
JAK2_druginhibition_167_GSE38335	GEO Signatures of Differentially Expressed Genes for Kinase Perturbations	1	1.41725
cerebellar cortex_10 mos_M_12977	Allen Brain Atlas Developing Human Brain Tissue Gene Expression Profiles by RNA-seq	-1	-2.55622
Lung adenocarcinoma_LUAD_TCGA-86-8056-01A-11R-2241-07	TCGA Signatures of Differentially Expressed Genes for Tumors	1	null
POLR2AphosphoS2_K562_hg19_1	ENCODE Transcription Factor Binding Site Profiles	1	null
laterodorsal part of putamen	Allen Brain Atlas Prenatal Human Brain Tissue Gene Expression Profiles	-1	-1.14853
H2AFZ_A549_hg19_1	ENCODE Transcription Factor Binding Site Profiles	1	null
Cerebellum	Allen Brain Atlas Adult Mouse Brain Tissue Gene Expression Profiles	1	1.09601
GTEX-RU1J-1326-SM-46MUL	GTEx Tissue Sample Gene Expression Profiles	1	0.870387
ETS2	MotifMap Predicted Transcription Factor Targets	1	null
hsa-miR-3157-5p	TargetScan Predicted Nonconserved microRNA Targets	1	1.55165
H3K4me3_epithelial cell of esophagus_hg19_2	ENCODE Histone Modification Site Profiles	1	null
cerebellar cortex_18 yrs_M_12984	Allen Brain Atlas Developing Human Brain Tissue Gene Expression Profiles by RNA-seq	-1	-1.02523
dorsolateral prefrontal cortex_16 pcw_M_12287	Allen Brain Atlas Developing Human Brain Tissue Gene Expression Profiles by RNA-seq	-1	-1.27786
TTC442	DepMap CRISPR Gene Dependency	1	3.01774
Adrenal Gland	GTEx Tissue Gene Expression Profiles 2023	1	1.92821
mRNA_GATA3_19796622	ESCAPE Omics Signatures of Genes and Proteins for Stem Cells	-1	null
PRDM5-23873026-MEFS-MOUSE	ChEA Transcription Factor Targets 2022	1	null
CREB1	JASPAR Predicted Transcription Factor Targets	1	null
GTF2B_K562_hg19_1	ENCODE Transcription Factor Binding Site Profiles	1	null
H3K4me3_CH12.LX_mm9_5	ENCODE Histone Modification Site Profiles	1	null
hsa-miR-19b	TargetScan Predicted Conserved microRNA Targets	1	0.37496
GTF2B_01_362	KnockTF Gene Expression Profiles with Transcription Factor Perturbations	1	1.7681
H3K27ac_Panc1_hg19_1	ENCODE Histone Modification Site Profiles	1	null
FOXP2_PFSK-1_hg19_1	ENCODE Transcription Factor Binding Site Profiles	1	null
SARS-CoV MA15_Day4-TNFRsf1b KO_None_GSE40824	GEO Signatures of Differentially Expressed Genes for Viral Infections	-1	-2.10901
SARS-CoV MA15_Day1-PFU-10^2_None_GSE33266	GEO Signatures of Differentially Expressed Genes for Viral Infections	1	2.47945
H3K36me3_iPS DF 6.9	Roadmap Epigenomics Histone Modification Site Profiles	1	null
CTCF_CH12.LX_mm9_4	ENCODE Transcription Factor Binding Site Profiles	1	null
CTCF_endothelial cell of umbilical vein_hg19_4	ENCODE Transcription Factor Binding Site Profiles	1	null
ZC3H11A	ENCODE Transcription Factor Targets	1	null
H2AFZ_keratinocyte_hg19_1	ENCODE Transcription Factor Binding Site Profiles	1	null
GTEX-QVJO-1426-SM-2S1QY	GTEx Tissue Sample Gene Expression Profiles	-1	-0.885219
TCF3_GM12878_hg19_2	ENCODE Transcription Factor Binding Site Profiles	1	null
NCIH441	CCLE Cell Line Gene Expression Profiles	-1	-1.89071
H3K4me3_fibroblast of foreskin _hg19_1	ENCODE Histone Modification Site Profiles	1	null
cellular cation homeostasis	GO Biological Process Annotations 2015	1	null
MYC-30127528-KELLY-HUMAN-BRAIN-NEUROBLASTOMA	ChEA Transcription Factor Targets 2022	1	null
Oogenesis phase fetal germ cell_Fetal gonad_Human	CellMarker Gene-Cell Type Associations	1	null
bonemarrow_5a	HPA Tissue Sample Gene Expression Profiles	-1	-2.38915
Lingula (I), granular layer	Allen Brain Atlas Adult Mouse Brain Tissue Gene Expression Profiles	1	1.19974
MAFK	ENCODE Transcription Factor Targets	1	null
H3K4me3_GM12878_hg19_2	ENCODE Histone Modification Site Profiles	1	null
hsa-miR-579	TargetScan Predicted Conserved microRNA Targets	1	0.013856
TRIM28	ChEA Transcription Factor Targets	1	null
CTCF_A549_hg19_2	ENCODE Transcription Factor Binding Site Profiles	1	null
OCIMY5	CCLE Cell Line Gene CNV Profiles	-1	-1.86011
Cervical squamous cell carcinoma and endocervical adenocarcinoma_CESC_TCGA-Q1-A73Q-01A-21R-A32P-07	TCGA Signatures of Differentially Expressed Genes for Tumors	1	null
GFI1B-20887958-HPC-7-MOUSE	ChEA Transcription Factor Targets 2022	1	null
BCLAF1	ENCODE Transcription Factor Targets	1	null
NCI-H522	Klijn et al., Nat. Biotechnol., 2015 Cell Line Gene Expression Profiles	-1	-0.861146
ChIP_ZFX_18555785	ESCAPE Omics Signatures of Genes and Proteins for Stem Cells	1	null
JUND_A549_hg19_2	ENCODE Transcription Factor Binding Site Profiles	1	null
19798054-ST	GeneSigDB Published Gene Signatures	1	null
CTCF_MCF-7_hg19_4	ENCODE Transcription Factor Binding Site Profiles	1	null
SEKI	DepMap CRISPR Gene Dependency	1	4.31298
H3K4me3_CD19 Primary Cells	Roadmap Epigenomics Histone Modification Site Profiles	1	null
increased bone mass	MPO Gene-Phenotype Associations	1	null
Molindone	DeepCoverMOA Drug Mechanisms of Action	1	0.37
POLR2A_HeLa-S3_hg19_4	ENCODE Transcription Factor Binding Site Profiles	1	null
orbital frontal cortex_21 yrs_F_13057	Allen Brain Atlas Developing Human Brain Tissue Gene Expression Profiles by RNA-seq	1	0.992058
TCF12_GM12878_hg19_1	ENCODE Transcription Factor Binding Site Profiles	1	null
H3K4me3_heart_mm9_2	ENCODE Histone Modification Site Profiles	1	null
GTEX-RUSQ-0926-SM-47JWU	GTEx Tissue Sample Gene Expression Profiles	1	0.932327
mononuclear cell	TISSUES Text-mining Tissue Protein Expression Evidence Scores	1	0.105759
DMS 273	Klijn et al., Nat. Biotechnol., 2015 Cell Line Gene CNV Profiles	-1	-0.882857
H3K4me3_fibroblast of mammary gland_hg19_1	ENCODE Histone Modification Site Profiles	1	null
TE-11	COSMIC Cell Line Gene Mutation Profiles	1	null
PHF8	ENCODE Transcription Factor Targets	1	null
RBBP5_H1-hESC_hg19_1	ENCODE Transcription Factor Binding Site Profiles	1	null
CEBPB	ENCODE Transcription Factor Targets	1	null
MYC_HepG2_hg19_1	ENCODE Transcription Factor Binding Site Profiles	1	null
GTEX-X585-0005-SM-46MV3	GTEx Tissue Sample Gene Expression Profiles	-1	-1.00363
r7 part of spinal trigeminal nucleus, interpolar part	Allen Brain Atlas Adult Mouse Brain Tissue Gene Expression Profiles	-1	-1.36852
dorsomedial hypothalamic nucleus	Allen Brain Atlas Prenatal Human Brain Tissue Gene Expression Profiles	1	0.871822
RWJ 50271	DeepCoverMOA Drug Mechanisms of Action	-1	-0.32
CTCF_K562_hg19_5	ENCODE Transcription Factor Binding Site Profiles	1	null
FOXC1	JASPAR Predicted Transcription Factor Targets	1	null
anterior (rostral) cingulate (medial prefrontal) cortex_16 pcw_M_12287	Allen Brain Atlas Developing Human Brain Tissue Gene Expression Profiles by RNA-seq	-1	-1.7683
STAT5A_K562_hg19_1	ENCODE Transcription Factor Binding Site Profiles	1	null
Roflumilast	DeepCoverMOA Drug Mechanisms of Action	-1	-0.35
E2F6_K562_hg19_1	ENCODE Transcription Factor Binding Site Profiles	1	null
GTEX-U4B1-0626-SM-3DB8L	GTEx Tissue Sample Gene Expression Profiles	1	1.20684
RCOR1_K562_hg19_2	ENCODE Transcription Factor Binding Site Profiles	1	null
SZ in subgenual cingulate cortex	Allen Brain Atlas Prenatal Human Brain Tissue Gene Expression Profiles	-1	-1.63769
GTEX-RM2N-0526-SM-2TF4N	GTEx Tissue Sample Gene Expression Profiles	1	1.48693
positive regulation of homeostatic process	GO Biological Process Annotations 2015	1	null
H3K4me3_fibroblast of dermis_hg19_1	ENCODE Histone Modification Site Profiles	1	null
H3K4me3_Penis Foreskin Keratinocyte Primary Cells	Roadmap Epigenomics Histone Modification Site Profiles	1	null
MIA PACA-2	Klijn et al., Nat. Biotechnol., 2015 Cell Line Gene CNV Profiles	-1	-0.961838
GTEX-W5WG-2726-SM-4LMIC	GTEx Tissue Sample Gene Expression Profiles	1	1.68103
phagocyte	TISSUES Text-mining Tissue Protein Expression Evidence Scores	1	0.110464
A-Vietnam-1203-2004(H5N1)_3Hour_21865398_GSE28166	GEO Signatures of Differentially Expressed Genes for Viral Infections	1	1.7917
CTCF_GM12866_hg19_1	ENCODE Transcription Factor Binding Site Profiles	1	null
Brain Lower Grade Glioma_LGG_TCGA-DU-5854-01A-11R-1708-07	TCGA Signatures of Differentially Expressed Genes for Tumors	1	null
CTCF_GM12865_hg19_3	ENCODE Transcription Factor Binding Site Profiles	1	null
H2AK5ac_H1	Roadmap Epigenomics Histone Modification Site Profiles	1	null
GTEX-QVUS-0006-SM-3GAE8	GTEx Tissue Sample Gene Expression Profiles	-1	-1.71451
OCUBM	DepMap CRISPR Gene Dependency	1	2.14736
MDAMB157	Heiser et al., PNAS, 2011 Cell Line Gene Expression Profiles	1	0.767769
marrow cell	TISSUES Text-mining Tissue Protein Expression Evidence Scores	1	0.100413
H3K4me3_Colonic Mucosa	Roadmap Epigenomics Histone Modification Site Profiles	1	null
CTCF_A549_hg19_8	ENCODE Transcription Factor Binding Site Profiles	1	null
hsa-miR-410	TargetScan Predicted Conserved microRNA Targets	1	0.034317
ZNF274_K562_hg19_1	ENCODE Transcription Factor Binding Site Profiles	1	null
TCF3_GM12878_hg19_1	ENCODE Transcription Factor Binding Site Profiles	1	null
Mitochondrial Diseases	CTD Gene-Disease Associations	1	1.03715
IZ in lateral temporal-occipital cortex	Allen Brain Atlas Prenatal Human Brain Tissue Gene Expression Profiles	-1	-2.3616
H3K9ac_CH12.LX_mm9_1	ENCODE Histone Modification Site Profiles	1	null
SALL4-18804426_ESC-MESC-mouse	ChEA Transcription Factor Binding Site Profiles	1	null
H3K4me1_megakaryocyte_mm9_3	ENCODE Histone Modification Site Profiles	1	null
H3K4me3_endothelial cell of umbilical vein_hg19_3	ENCODE Histone Modification Site Profiles	1	null
MCF7	COSMIC Cell Line Gene Mutation Profiles	1	null
ELK1_HeLa-S3_hg19_1	ENCODE Transcription Factor Binding Site Profiles	1	null
CTCF_bronchial epithelial cell_hg19_2	ENCODE Transcription Factor Binding Site Profiles	1	null
YY1	MotifMap Predicted Transcription Factor Targets	1	null
H3K4me3_fibroblast of lung_hg19_1	ENCODE Histone Modification Site Profiles	1	null
Lung adenocarcinoma_LUAD_TCGA-91-6840-01A-11R-1949-07	TCGA Signatures of Differentially Expressed Genes for Tumors	1	null
GTEX-PWN1-2026-SM-48TD9	GTEx Tissue Sample Gene Expression Profiles	1	1.30975
znf217_22593193_mda_mb_231_gof_human_gpl570_gse35511	GEO Signatures of Differentially Expressed Genes for Transcription Factor Perturbations	-1	-0.909302
MM1S	CCLE Cell Line Gene CNV Profiles	-1	-1.88632
CTCF_HCT116_hg19_4	ENCODE Transcription Factor Binding Site Profiles	1	null
CTCF_fibroblast of the aortic adventitia_hg19_2	ENCODE Transcription Factor Binding Site Profiles	1	null
POLR2A_GM12878_hg19_4	ENCODE Transcription Factor Binding Site Profiles	1	null
skeletal muscle	HPA Tissue Protein Expression Profiles	-1	-1.00606
abnormal circulating hormone level	MPO Gene-Phenotype Associations	1	null
KURAMOCHI	Klijn et al., Nat. Biotechnol., 2015 Cell Line Gene CNV Profiles	1	0.891131
intermediate stratum of m2ADL	Allen Brain Atlas Adult Mouse Brain Tissue Gene Expression Profiles	1	1.25311
amygdaloid complex_16 pcw_M_12837	Allen Brain Atlas Developing Human Brain Tissue Gene Expression Profiles by RNA-seq	-1	-0.831017
H3K27ac_A549_hg19_1	ENCODE Histone Modification Site Profiles	1	null
H3K4me2_mammary epithelial cell_hg19_1	ENCODE Histone Modification Site Profiles	1	null
Lung squamous cell carcinoma_LUSC_TCGA-60-2719-01A-01R-0851-07	TCGA Signatures of Differentially Expressed Genes for Tumors	1	null
POLR2A_A549_hg19_5	ENCODE Transcription Factor Binding Site Profiles	1	null
NCIH1781	CCLE Cell Line Gene CNV Profiles	-1	-2.17598
POLR2AphosphoS5_GM12891_hg19_2	ENCODE Transcription Factor Binding Site Profiles	1	null
EP300_SK-N-SH_hg19_2	ENCODE Transcription Factor Binding Site Profiles	1	null
TEAD4_H1-hESC_hg19_1	ENCODE Transcription Factor Binding Site Profiles	1	null
H3K4me2_keratinocyte_hg19_1	ENCODE Histone Modification Site Profiles	1	null
epidermis	TISSUES Curated Tissue Protein Expression Evidence Scores	1	null
anterior (rostral) cingulate (medial prefrontal) cortex_13 pcw_F_12834	Allen Brain Atlas Developing Human Brain Tissue Gene Expression Profiles by RNA-seq	-1	-1.08121
SUM52PE	Heiser et al., PNAS, 2011 Cell Line Gene Expression Profiles	-1	-0.897358
hsa-miR-3119	TargetScan Predicted Conserved microRNA Targets	1	0.714812
GTEX-P78B-0005-SM-2I5GM	GTEx Tissue Sample Gene Expression Profiles	-1	-1.0219
JJN-3	COSMIC Cell Line Gene CNV Profiles	1	2.06989
SAP30	ENCODE Transcription Factor Targets	1	null
CHD4-35695185-NICBASALROOTGANGLIA-MOUSE-EMBRYO	ChEA Transcription Factor Targets 2022	1	null
GTEX-U4B1-0126-SM-4DXSN	GTEx Tissue Sample Gene Expression Profiles	1	0.97888
hsa-miR-4705	TargetScan Predicted Nonconserved microRNA Targets	1	0.965816
periventricular stratum of r2BM	Allen Brain Atlas Adult Mouse Brain Tissue Gene Expression Profiles	-1	-1.12482
CHD7	ENCODE Transcription Factor Targets	1	null
POLR2AphosphoS5_endothelial cell of umbilical vein_hg19_2	ENCODE Transcription Factor Binding Site Profiles	1	null
GTEX-X8HC-0006-SM-46MV6	GTEx Tissue Sample Gene Expression Profiles	-1	-1.45576
EGR1_GM12878_hg19_1	ENCODE Transcription Factor Binding Site Profiles	1	null
EPLC-272H	Klijn et al., Nat. Biotechnol., 2015 Cell Line Gene Expression Profiles	-1	-1.72896
Kidney renal clear cell carcinoma_KIRC_TCGA-BP-4799-01A-01R-1305-07	TCGA Signatures of Differentially Expressed Genes for Tumors	1	null
MYC_MCF-7_hg19_2	ENCODE Transcription Factor Binding Site Profiles	1	null
abnormal hematopoietic cell number	MPO Gene-Phenotype Associations	1	null
H3K4me3_GM06990_hg19_1	ENCODE Histone Modification Site Profiles	1	null
GTEX-Q2AI-0326-SM-2I3EK	GTEx Tissue Sample Gene Expression Profiles	1	0.89708
Cervical squamous cell carcinoma and endocervical adenocarcinoma_CESC_TCGA-MY-A5BF-01A-11R-A26T-07	TCGA Signatures of Differentially Expressed Genes for Tumors	1	null
hsa-miR-664	TargetScan Predicted Conserved microRNA Targets	1	0.002088
CEBPD_HepG2_hg19_2	ENCODE Transcription Factor Binding Site Profiles	1	null
t60-adrenal_female_2w	MoTrPAC Rat Endurance Exercise Training	-1	-1.79047
GTEX-RU72-0006-SM-2TF65	GTEx Tissue Sample Gene Expression Profiles	-1	-1.18906
POLR2A_K562_hg19_3	ENCODE Transcription Factor Binding Site Profiles	1	null
CTCF_K562_hg19_6	ENCODE Transcription Factor Binding Site Profiles	1	null
UPF 648	DeepCoverMOA Drug Mechanisms of Action	1	0.31
lymphnode_5b	HPA Tissue Sample Gene Expression Profiles	1	1.14195
POLR2A_MEL cell line_mm9_1	ENCODE Transcription Factor Binding Site Profiles	1	null
LC-1-SQ	COSMIC Cell Line Gene CNV Profiles	1	2.06989
H3K27ac_olfactory bulb_mm9_1	ENCODE Histone Modification Site Profiles	1	null
Hypertriglyceridemia	CTD Gene-Disease Associations	1	1.13484
SNU-387	Klijn et al., Nat. Biotechnol., 2015 Cell Line Gene CNV Profiles	-1	-1.36429
POLR2AphosphoS5_PFSK-1_hg19_1	ENCODE Transcription Factor Binding Site Profiles	1	null
VZ in caudal hippocampal proper	Allen Brain Atlas Prenatal Human Brain Tissue Gene Expression Profiles	1	2.19317
Ralfinamide	DeepCoverMOA Drug Mechanisms of Action	1	0.76
Fetal Death	CTD Gene-Disease Associations	1	1.24275
SIN3A	ENCODE Transcription Factor Targets	1	null
Declive (VI)	Allen Brain Atlas Adult Mouse Brain Tissue Gene Expression Profiles	1	1.85439
GSK343	DeepCoverMOA Drug Mechanisms of Action	-1	-1.05
cerebellum_13 pcw_M_12888	Allen Brain Atlas Developing Human Brain Tissue Gene Expression Profiles by RNA-seq	-1	-1.06704
GTEX-WH7G-0526-SM-3NMBI	GTEx Tissue Sample Gene Expression Profiles	1	1.44876
mRNA_T_19796622	ESCAPE Omics Signatures of Genes and Proteins for Stem Cells	1	null
HNF4alpha_DEPLETION_GDS4798_91_human_HepG2 hepatocellular carcinoma cells	GEO Signatures of Differentially Expressed Genes for Gene Perturbations	1	null
POLR2A_thymus_mm9_1	ENCODE Transcription Factor Binding Site Profiles	1	null
smooth muscle	HPA Tissue Gene Expression Profiles	1	0.864971
skeletalmuscle_d	HPA Tissue Sample Gene Expression Profiles	-1	-1.01693
CTCF_GM12892_hg19_1	ENCODE Transcription Factor Binding Site Profiles	1	null
Lung adenocarcinoma_LUAD_TCGA-97-7547-01A-11R-2039-07	TCGA Signatures of Differentially Expressed Genes for Tumors	1	null
GTEX-WRHU-1226-SM-4E3IJ	GTEx Tissue Sample Gene Expression Profiles	-1	-1.16261
TAF1_SK-N-SH_hg19_1	ENCODE Transcription Factor Binding Site Profiles	1	null
COV318	CCLE Cell Line Gene CNV Profiles	-1	-1.85362
mRNA_MYOD1_19796622	ESCAPE Omics Signatures of Genes and Proteins for Stem Cells	1	null
GTEX-S341-0226-SM-2XCAX	GTEx Tissue Sample Gene Expression Profiles	1	1.27464
H3K4me3_GM12875_hg19_1	ENCODE Histone Modification Site Profiles	1	null
REST	ChEA Transcription Factor Targets	1	null
GTEX-XV7Q-2226-SM-4BRVY	GTEx Tissue Sample Gene Expression Profiles	1	1.17992
regulation of osteoblast differentiation	GO Biological Process Annotations 2025	1	null
CTCF_A549_hg19_9	ENCODE Transcription Factor Binding Site Profiles	1	null
KNS42	CCLE Cell Line Gene CNV Profiles	-1	-1.38946
Prostate adenocarcinoma_PRAD_TCGA-YL-A9WI-01A-11R-A37L-07	TCGA Signatures of Differentially Expressed Genes for Tumors	1	null
GTEX-WFG8-0426-SM-3GILD	GTEx Tissue Sample Gene Expression Profiles	1	1.17246
regulation of cellular process	GO Biological Process Annotations 2015	1	null
Kidney renal papillary cell carcinoma_KIRP_TCGA-F9-A97G-01A-11R-A38C-07	TCGA Signatures of Differentially Expressed Genes for Tumors	1	null
GTEX-N7MT-1226-SM-2D7W4	GTEx Tissue Sample Gene Expression Profiles	-1	-0.863849
sarcoplasm	COMPARTMENTS Text-mining Protein Localization Evidence Scores	1	0.33511
EP300_H1-hESC_hg19_1	ENCODE Transcription Factor Binding Site Profiles	1	null
GTEX-XUZC-1526-SM-4BRV4	GTEx Tissue Sample Gene Expression Profiles	1	1.23001
H3K4me3_CH12.LX_mm9_3	ENCODE Histone Modification Site Profiles	1	null
TAF1_K562_hg19_1	ENCODE Transcription Factor Binding Site Profiles	1	null
Kidney renal clear cell carcinoma_KIRC_TCGA-B0-4827-01A-02R-1420-07	TCGA Signatures of Differentially Expressed Genes for Tumors	1	null
plasma membrane	LOCATE Predicted Protein Localization Annotations	1	null
Skin Cutaneous Melanoma_SKCM_TCGA-D9-A4Z5-01A-11R-A266-07	TCGA Signatures of Differentially Expressed Genes for Tumors	1	null
YY1	ENCODE Transcription Factor Targets	1	null
regulation of osteoclast differentiation	GO Biological Process Annotations 2023	1	null
hsa-miR-4762-3p	TargetScan Predicted Nonconserved microRNA Targets	1	0.843347
SPI1	ENCODE Transcription Factor Targets	1	null
REST-19997604-NEURONS-MOUSE	ChEA Transcription Factor Binding Site Profiles	1	null
BCLAF1_GM12878_hg19_1	ENCODE Transcription Factor Binding Site Profiles	1	null
AF4-26711339-SEM-HUMAN-BLOOD-LEUKEMIA	ChEA Transcription Factor Targets 2022	1	null
GTEX-QLQW-1226-SM-2S1Q9	GTEx Tissue Sample Gene Expression Profiles	1	1.09451
Rectum adenocarcinoma_READ_TCGA-AG-3731-01A-11R-1736-07	TCGA Signatures of Differentially Expressed Genes for Tumors	1	null
HNF4A_KD_GSE29084_694_human_HepG2 cells	GEO Signatures of Differentially Expressed Genes for Gene Perturbations	-1	null
GTEX-R53T-0005-SM-3GADK	GTEx Tissue Sample Gene Expression Profiles	-1	-1.10946
CTCF_foreskin fibroblast_hg19_2	ENCODE Transcription Factor Binding Site Profiles	1	null
mRNA_JARID2_20075857	ESCAPE Omics Signatures of Genes and Proteins for Stem Cells	-1	null
HEC265	CCLE Cell Line Gene Expression Profiles	-1	-1.48184
H3K27ac_ES-E14_mm9_1	ENCODE Histone Modification Site Profiles	1	null
MDA-MB-361	Klijn et al., Nat. Biotechnol., 2015 Cell Line Gene CNV Profiles	1	0.831087
cerebellar cortex_3 yrs_F_12836	Allen Brain Atlas Developing Human Brain Tissue Gene Expression Profiles by RNA-seq	-1	-1.29181
GTEX-TMMY-1526-SM-4DXST	GTEx Tissue Sample Gene Expression Profiles	1	1.12975
VZ in medial temporal-occipital cortex	Allen Brain Atlas Prenatal Human Brain Tissue Gene Expression Profiles	1	0.831167
GTEX-UPK5-0008-SM-4IHJD	GTEx Tissue Sample Gene Expression Profiles	1	1.07223
TBP_HepG2_hg19_1	ENCODE Transcription Factor Binding Site Profiles	1	null
Prostate adenocarcinoma_PRAD_TCGA-EJ-7783-11A-01R-2118-07	TCGA Signatures of Differentially Expressed Genes for Tumors	1	null
H3K27me3_HepG2_hg19_1	ENCODE Transcription Factor Binding Site Profiles	1	null
r2 part of trigeminal transition zone	Allen Brain Atlas Adult Mouse Brain Tissue Gene Expression Profiles	-1	-1.99706
GTEX-PWOO-0006-SM-2I3E3	GTEx Tissue Sample Gene Expression Profiles	-1	-1.08114
HCC2935	CCLE Cell Line Gene CNV Profiles	-1	-1.8313
abnormal hormone level	MPO Gene-Phenotype Associations	1	null
primary visual cortex (striate cortex, area V1/17)_13 pcw_M_12888	Allen Brain Atlas Developing Human Brain Tissue Gene Expression Profiles by RNA-seq	-1	-1.29049
RAD21_IMR-90_hg19_1	ENCODE Transcription Factor Binding Site Profiles	1	null
GTEX-XLM4-0005-SM-4AT4P	GTEx Tissue Sample Gene Expression Profiles	-1	-1.42196
HCC2911	Klijn et al., Nat. Biotechnol., 2015 Cell Line Gene Expression Profiles	1	2.02782
SMAD3-21741376-EPCS-HUMAN	ChEA Transcription Factor Targets 2022	1	null
POLR2AphosphoS5_HepG2_hg19_2	ENCODE Transcription Factor Binding Site Profiles	1	null
Lung adenocarcinoma_LUAD_TCGA-78-7145-01A-11R-2039-07	TCGA Signatures of Differentially Expressed Genes for Tumors	1	null
Eletriptan	DeepCoverMOA Drug Mechanisms of Action	1	0.63
CTCF_cardiac muscle cell_hg19_1	ENCODE Transcription Factor Binding Site Profiles	1	null
H2AFZ_astrocyte_hg19_1	ENCODE Transcription Factor Binding Site Profiles	1	null
GTEX-S4Z8-0326-SM-3K2AU	GTEx Tissue Sample Gene Expression Profiles	1	0.947671
TCF3-18467660-MESCS-MOUSE	ChEA Transcription Factor Targets 2022	1	null
Brain Lower Grade Glioma_LGG_TCGA-P5-A5F1-01A-11R-A28M-07	TCGA Signatures of Differentially Expressed Genes for Tumors	1	null
valproic acid_homo sapiens_gpl570_gse14973	GEO Signatures of Differentially Expressed Genes for Small Molecules	1	null
GTEX-QCQG-1826-SM-2S1P2	GTEx Tissue Sample Gene Expression Profiles	1	0.842284
CTCF_GM10248_hg19_1	ENCODE Transcription Factor Binding Site Profiles	1	null
GTEX-QLQW-0005-SM-2S1RA	GTEx Tissue Sample Gene Expression Profiles	-1	-1.33295
MYOD1	ENCODE Transcription Factor Targets	1	null
inferolateral temporal cortex (area TEv, area 20)_4 mos_M_12889	Allen Brain Atlas Developing Human Brain Tissue Gene Expression Profiles by RNA-seq	-1	-0.996636
skeletalmuscle_a	HPA Tissue Sample Gene Expression Profiles	-1	-1.40438
NCI-H322T	Klijn et al., Nat. Biotechnol., 2015 Cell Line Gene CNV Profiles	1	1.57414
Head and Neck squamous cell carcinoma_HNSC_TCGA-CV-6962-01A-11R-1915-07	TCGA Signatures of Differentially Expressed Genes for Tumors	1	null
Uterine Carcinosarcoma_UCS_TCGA-QN-A5NN-01A-11R-A28V-07	TCGA Signatures of Differentially Expressed Genes for Tumors	1	null
MXI1_SK-N-SH_hg19_1	ENCODE Transcription Factor Binding Site Profiles	1	null
CTCF_HEK293_hg19_2	ENCODE Transcription Factor Binding Site Profiles	1	null
hsa-miR-1912	TargetScan Predicted Nonconserved microRNA Targets	1	1.99187
hsa-miR-3945	TargetScan Predicted Nonconserved microRNA Targets	1	1.13535
MXI1_IMR-90_hg19_1	ENCODE Transcription Factor Binding Site Profiles	1	null
HCC38	Heiser et al., PNAS, 2011 Cell Line Gene Expression Profiles	1	0.745323
GTEX-TML8-0008-SM-4DXUI	GTEx Tissue Sample Gene Expression Profiles	1	1.46854
r3 part of the trigeminal motor nucleus	Allen Brain Atlas Adult Mouse Brain Tissue Gene Expression Profiles	-1	-1.50418
GTEX-S7SE-0011-R11A-SM-2XCDD	GTEx Tissue Sample Gene Expression Profiles	-1	-1.12437
NFATC1	ENCODE Transcription Factor Targets	1	null
MAZ_HeLa-S3_hg19_1	ENCODE Transcription Factor Binding Site Profiles	1	null
HCC1954	COSMIC Cell Line Gene CNV Profiles	1	2.06989
anterior (rostral) cingulate (medial prefrontal) cortex_8 yrs_M_12981	Allen Brain Atlas Developing Human Brain Tissue Gene Expression Profiles by RNA-seq	1	2.25449
CTCF_thymus_mm9_1	ENCODE Transcription Factor Binding Site Profiles	1	null
HCC2688	Klijn et al., Nat. Biotechnol., 2015 Cell Line Gene CNV Profiles	-1	-0.882211
Sarcoma_SARC_TCGA-3R-A8YX-01A-11R-A37L-07	TCGA Signatures of Differentially Expressed Genes for Tumors	1	null
CP in caudal subicular cortex	Allen Brain Atlas Prenatal Human Brain Tissue Gene Expression Profiles	1	1.03779
SP1	ENCODE Transcription Factor Targets	1	null
regulation of myeloid cell differentiation	GO Biological Process Annotations 2015	1	null
H3K27ac_brown adipose tissue_mm9_1	ENCODE Histone Modification Site Profiles	1	null
r1 part of principal trigeminal sensory nucleus	Allen Brain Atlas Adult Mouse Brain Tissue Gene Expression Profiles	-1	-1.30686
anterior pretectal nucleus, ventral superficial part	Allen Brain Atlas Adult Mouse Brain Tissue Gene Expression Profiles	1	1.31227
urogenital system	TISSUES Curated Tissue Protein Expression Evidence Scores	1	null
POLR2A_liver_mm9_1	ENCODE Transcription Factor Binding Site Profiles	1	null
AF4-28076791-SEM-HUMAN-BLOOD-LEUKEMIA	ChEA Transcription Factor Targets 2022	1	null
abnormal osteoblast morphology	MGI Mouse Phenotype Associations 2023	1	null
GR79236	DeepCoverMOA Drug Mechanisms of Action	-1	-0.37
arcuate nucleus of hypothalamus	Allen Brain Atlas Prenatal Human Brain Tissue Gene Expression Profiles	1	1.58526
GTEX-X5EB-0008-SM-46MU3	GTEx Tissue Sample Gene Expression Profiles	1	0.852307
Bladder Urothelial Carcinoma_BLCA_TCGA-FD-A43N-01A-11R-A23W-07	TCGA Signatures of Differentially Expressed Genes for Tumors	1	null
CEBPB_K562_hg19_1	ENCODE Transcription Factor Binding Site Profiles	1	null
GTEX-TKQ2-0006-SM-33HBH	GTEx Tissue Sample Gene Expression Profiles	-1	-1.12449
H3K4me3_cardiac mesoderm_hg19_8	ENCODE Histone Modification Site Profiles	1	null
increased bone ossification	MGI Mouse Phenotype Associations 2023	1	null
GTEX-T8EM-0326-SM-3DB7F	GTEx Tissue Sample Gene Expression Profiles	1	0.860057
H3K4me3_SK-N-SH_hg19_2	ENCODE Histone Modification Site Profiles	1	null
hsa-miR-186-5p	MiRTarBase microRNA Targets	1	null
REST_K562_hg19_2	ENCODE Transcription Factor Binding Site Profiles	1	null
NCI-H345	Klijn et al., Nat. Biotechnol., 2015 Cell Line Gene CNV Profiles	-1	-0.84252
H3K4me3_WI38_hg19_4	ENCODE Histone Modification Site Profiles	1	null
r10 portion of the hypoglossal motor nucleus	Allen Brain Atlas Adult Mouse Brain Tissue Gene Expression Profiles	-1	-1.08171
SG in caudal entorhinal cortex	Allen Brain Atlas Prenatal Human Brain Tissue Gene Expression Profiles	1	1.09404
DV-90	Klijn et al., Nat. Biotechnol., 2015 Cell Line Gene Expression Profiles	-1	-1.4937
eGFP-JUND_K562_hg19_1	ENCODE Transcription Factor Binding Site Profiles	1	null
SCLC-22H	Klijn et al., Nat. Biotechnol., 2015 Cell Line Gene CNV Profiles	-1	-1.66357
GATA2-20887958-HPC-7-MOUSE	ChEA Transcription Factor Targets 2022	1	null
nucleus sagulum, superficial part	Allen Brain Atlas Adult Mouse Brain Tissue Gene Expression Profiles	1	2.74657
GTEX-S7SF-0006-SM-3K2B6	GTEx Tissue Sample Gene Expression Profiles	-1	-0.896723
hsa-miR-501-5p	TargetScan Predicted Nonconserved microRNA Targets	1	0.843347
GTEX-X4XX-0926-SM-46MV7	GTEx Tissue Sample Gene Expression Profiles	1	0.996124
GTEX-QESD-0008-SM-447B2	GTEx Tissue Sample Gene Expression Profiles	1	1.82847
ZNF143	ENCODE Transcription Factor Targets	1	null
positive regulation of multicellular organismal process	GO Biological Process Annotations 2023	1	null
Lung adenocarcinoma_LUAD_TCGA-35-4122-01A-01R-1107-07	TCGA Signatures of Differentially Expressed Genes for Tumors	1	null
cingulum bundle, right	Allen Brain Atlas Adult Human Brain Tissue Gene Expression Profiles	1	1.81346
Lung squamous cell carcinoma_LUSC_TCGA-60-2706-01A-01R-0851-07	TCGA Signatures of Differentially Expressed Genes for Tumors	1	null
MYC_H1-hESC_hg19_2	ENCODE Transcription Factor Binding Site Profiles	1	null
GTEX-X261-0011-R7A-SM-4E3JJ	GTEx Tissue Sample Gene Expression Profiles	-1	-1.16374
SG in rostral perirhinal cortex	Allen Brain Atlas Prenatal Human Brain Tissue Gene Expression Profiles	1	1.33831
Cardiomyopathies	CTD Gene-Disease Associations	1	1.07983
POLR2A_limb_mm9_1	ENCODE Transcription Factor Binding Site Profiles	1	null
HDAC1_K562_hg19_1	ENCODE Transcription Factor Binding Site Profiles	1	null
H3K4me3_choroid plexus epithelial cell_hg19_2	ENCODE Histone Modification Site Profiles	1	null
regulation of bone remodeling	GO Biological Process Annotations 2015	1	null
H3K27ac_cortical plate_mm9_1	ENCODE Histone Modification Site Profiles	1	null
HCC1599	Klijn et al., Nat. Biotechnol., 2015 Cell Line Gene Expression Profiles	1	0.97599
CTCF_cardiac fibroblast_hg19_1	ENCODE Transcription Factor Binding Site Profiles	1	null
superficial stratum of DTTh	Allen Brain Atlas Adult Mouse Brain Tissue Gene Expression Profiles	-1	-1.22368
inferolateral temporal cortex (area TEv, area 20)_11 yrs_F_12289	Allen Brain Atlas Developing Human Brain Tissue Gene Expression Profiles by RNA-seq	1	2.34651
GTEX-OOBK-2626-SM-2HMKY	GTEx Tissue Sample Gene Expression Profiles	1	1.01539
superficial stratum of r1Tr	Allen Brain Atlas Adult Mouse Brain Tissue Gene Expression Profiles	-1	-1.30566
GTEX-V955-1026-SM-4JBHO	GTEx Tissue Sample Gene Expression Profiles	1	0.933572
CHAGOK1	CCLE Cell Line Gene CNV Profiles	-1	-2.02274
EP300_osteoblast_hg19_1	ENCODE Transcription Factor Binding Site Profiles	1	null
MKN-74	Klijn et al., Nat. Biotechnol., 2015 Cell Line Gene Expression Profiles	1	1.21528
H3K27ac_limb_mm9_1	ENCODE Histone Modification Site Profiles	1	null
SKGT2	DepMap CRISPR Gene Dependency	1	2.0646
POLR2A_bone marrow macrophage_mm9_1	ENCODE Transcription Factor Binding Site Profiles	1	null
small intestine	HPA Tissue Protein Expression Profiles	1	0.919228
SIHA	Klijn et al., Nat. Biotechnol., 2015 Cell Line Gene CNV Profiles	-1	-0.981722
whole body	TISSUES Curated Tissue Protein Expression Evidence Scores	1	null
H3K4me1_megakaryocyte_mm9_1	ENCODE Histone Modification Site Profiles	1	null
CTCF_GM12867_hg19_1	ENCODE Transcription Factor Binding Site Profiles	1	null
VIIIB, left, paravermis	Allen Brain Atlas Adult Human Brain Tissue Gene Expression Profiles	-1	-0.941862
HCC1419	CCLE Cell Line Gene CNV Profiles	1	2.23081
Skin Cutaneous Melanoma_SKCM_TCGA-D3-A2J7-06A-11R-A18T-07	TCGA Signatures of Differentially Expressed Genes for Tumors	1	null
HDAC6_K562_hg19_1	ENCODE Transcription Factor Binding Site Profiles	1	null
GATA2-21666600-HMVEC-HUMAN	ChEA Transcription Factor Targets 2022	1	null
WSU-NHL	Klijn et al., Nat. Biotechnol., 2015 Cell Line Gene Expression Profiles	1	1.26438
Field CA2, stratum lacunosum-moleculare	Allen Brain Atlas Adult Mouse Brain Tissue Gene Expression Profiles	-1	-1.01493
GFI1B	ChEA Transcription Factor Targets	1	null
animal	TISSUES Experimental Tissue Protein Expression Evidence Scores	1	1.53602
CTCF_GM12873_hg19_3	ENCODE Transcription Factor Binding Site Profiles	1	null
H3K4me3_bone marrow macrophage_mm9_1	ENCODE Histone Modification Site Profiles	1	null
GTEX-S4P3-0226-SM-3K2BD	GTEx Tissue Sample Gene Expression Profiles	1	0.917094
negative regulation of osteoblast differentiation	GO Biological Process Annotations 2025	1	null
H2AFZ_HepG2_hg19_1	ENCODE Transcription Factor Binding Site Profiles	1	null
liminal reticular formation of m2	Allen Brain Atlas Adult Mouse Brain Tissue Gene Expression Profiles	1	2.44009
BHLHE40_K562_hg19_1	ENCODE Transcription Factor Binding Site Profiles	1	null
In situ melanoma of skin_Epidermis_GSE4587	GEO Signatures of Differentially Expressed Genes for Diseases	1	1.20686
SARS-CoV MA15_Day4-C57BL6_None_GSE51386	GEO Signatures of Differentially Expressed Genes for Viral Infections	-1	-1.9472
H3K9ac_keratinocyte_hg19_1	ENCODE Histone Modification Site Profiles	1	null
subbrachial nucleus, caudal part	Allen Brain Atlas Adult Mouse Brain Tissue Gene Expression Profiles	1	2.06945
GTEX-UJMC-0326-SM-3GAE2	GTEx Tissue Sample Gene Expression Profiles	1	1.52122
CTCF_H1-hESC_hg19_2	ENCODE Transcription Factor Binding Site Profiles	1	null
GTEX-U3ZN-1226-SM-4DXUD	GTEx Tissue Sample Gene Expression Profiles	1	0.870117
GTEX-O5YW-0326-SM-2I5EI	GTEx Tissue Sample Gene Expression Profiles	-1	-0.97333
CAL-120	Klijn et al., Nat. Biotechnol., 2015 Cell Line Gene Expression Profiles	1	1.33513
outer SZ in posteroinferior (ventral) parietal cortex	Allen Brain Atlas Prenatal Human Brain Tissue Gene Expression Profiles	-1	-2.54521
GTEX-RM2N-0006-SM-2TF5H	GTEx Tissue Sample Gene Expression Profiles	-1	-0.902331
GTEX-P4QT-1326-SM-3NMD3	GTEx Tissue Sample Gene Expression Profiles	1	0.959557
mainolfactoryepithelium.MOE.	BioGPS Mouse Cell Type and Tissue Gene Expression Profiles	1	1.12164
GTEX-NL3H-0011-R1a-SM-48TDJ	GTEx Tissue Sample Gene Expression Profiles	-1	-1.1989
GATA1_MEL cell line_mm9_2	ENCODE Transcription Factor Binding Site Profiles	1	null
Diethylstilbestrol	DeepCoverMOA Drug Mechanisms of Action	1	0.29
GTEX-WYJK-0005-SM-3NMA1	GTEx Tissue Sample Gene Expression Profiles	-1	-0.981952
hypothalamic amygdala	Allen Brain Atlas Adult Mouse Brain Tissue Gene Expression Profiles	1	1.09462
medial amygdala, posterodorsal part	Allen Brain Atlas Adult Mouse Brain Tissue Gene Expression Profiles	1	1.19107
ntera2	HPA Cell Line Gene Expression Profiles	-1	-0.89423
Skin Cutaneous Melanoma_SKCM_TCGA-EB-A5VU-01A-21R-A32P-07	TCGA Signatures of Differentially Expressed Genes for Tumors	1	null
outer SZ in primary somatosensory cortex	Allen Brain Atlas Prenatal Human Brain Tissue Gene Expression Profiles	-1	-0.830674
increased trabecular bone volume	MGI Mouse Phenotype Associations 2023	1	null
CTCF_BE2C_hg19_2	ENCODE Transcription Factor Binding Site Profiles	1	null
H3K4me1_Panc1_hg19_1	ENCODE Histone Modification Site Profiles	1	null
E2F6_H1-hESC_hg19_1	ENCODE Transcription Factor Binding Site Profiles	1	null
abnormal immune system cell morphology	MPO Gene-Phenotype Associations	1	null
Lung squamous cell carcinoma_LUSC_TCGA-63-7023-01A-11R-1949-07	TCGA Signatures of Differentially Expressed Genes for Tumors	1	null
hsa-miR-520e	TargetScan Predicted Conserved microRNA Targets	1	0.361556
Prelimbic area	Allen Brain Atlas Adult Mouse Brain Tissue Gene Expression Profiles	1	1.14167
hsa-miR-20b	TargetScan Predicted Conserved microRNA Targets	1	0.997906
hsa-miR-4691-3p	TargetScan Predicted Nonconserved microRNA Targets	1	1.99187
positive regulation of multicellular organismal process	GO Biological Process Annotations 2025	1	null
EP300	ENCODE Transcription Factor Targets	1	null
CTCF_GM13976_hg19_1	ENCODE Transcription Factor Binding Site Profiles	1	null
mantle zone of AHy	Allen Brain Atlas Adult Mouse Brain Tissue Gene Expression Profiles	1	1.09394
H3K4me3_BE2C_hg19_2	ENCODE Histone Modification Site Profiles	1	null
H3K4me3_megakaryocyte_mm9_3	ENCODE Histone Modification Site Profiles	1	null
18614019-TableS4c	GeneSigDB Published Gene Signatures	1	null
AU565	COSMIC Cell Line Gene CNV Profiles	1	2.06989
fat_8b	HPA Tissue Sample Gene Expression Profiles	1	0.862268
SG in lateral temporal-occipital cortex	Allen Brain Atlas Prenatal Human Brain Tissue Gene Expression Profiles	1	0.892288
CTCF_epithelial cell of esophagus_hg19_2	ENCODE Transcription Factor Binding Site Profiles	1	null
PMC4202272__F1	PFOCR Pathway Figure Associations 2023	1	null
GTEX-O5YT-1626-SM-32PK6	GTEx Tissue Sample Gene Expression Profiles	-1	-0.952582
osteogenic cell	TISSUES Text-mining Tissue Protein Expression Evidence Scores	1	0.500007
medioventral part of putamen	Allen Brain Atlas Prenatal Human Brain Tissue Gene Expression Profiles	-1	-1.29905
TP53	ChEA Transcription Factor Targets	1	null
Bladder Urothelial Carcinoma_BLCA_TCGA-GV-A3JV-01A-11R-A220-07	TCGA Signatures of Differentially Expressed Genes for Tumors	1	null
NFE2L2-20460467-MEF-MOUSE	ChEA Transcription Factor Binding Site Profiles	1	null
Formestane	DeepCoverMOA Drug Mechanisms of Action	-1	-0.63
SCLC21H	CCLE Cell Line Gene CNV Profiles	-1	-1.79174
GTEX-WCDI-0005-SM-3NB2M	GTEx Tissue Sample Gene Expression Profiles	-1	-1.2199
Acute Myeloid Leukemia_LAML_TCGA-AB-2938-03A-01T-0736-13	TCGA Signatures of Differentially Expressed Genes for Tumors	1	null
inferolateral temporal cortex (area TEv, area 20)_21 pcw_F_12365	Allen Brain Atlas Developing Human Brain Tissue Gene Expression Profiles by RNA-seq	-1	-1.36525
rostral migratory stream	Allen Brain Atlas Prenatal Human Brain Tissue Gene Expression Profiles	-1	-2.14719
GTEX-VJYA-0426-SM-3GIJK	GTEx Tissue Sample Gene Expression Profiles	1	1.19891
SNU668	DepMap CRISPR Gene Dependency	1	2.46566
TBX20-22080862-HEART-MOUSE	ChEA Transcription Factor Targets 2022	1	null
intermediate stratum of DG	Allen Brain Atlas Adult Mouse Brain Tissue Gene Expression Profiles	-1	-1.11971
amygdaloid complex_21 yrs_F_13057	Allen Brain Atlas Developing Human Brain Tissue Gene Expression Profiles by RNA-seq	1	1.13214
GTEX-QCQG-0126-SM-48U27	GTEx Tissue Sample Gene Expression Profiles	1	0.871407
GTEX-QVUS-2926-SM-3GIJB	GTEx Tissue Sample Gene Expression Profiles	-1	-0.827715
Prelimbic area, layer 6a	Allen Brain Atlas Adult Mouse Brain Tissue Gene Expression Profiles	1	1.02882
GATA3	ENCODE Transcription Factor Targets	1	null
POLR2A_kidney_mm9_1	ENCODE Transcription Factor Binding Site Profiles	1	null
POLR2A_GM18505_hg19_1	ENCODE Transcription Factor Binding Site Profiles	1	null
CTCF_GM13977_hg19_1	ENCODE Transcription Factor Binding Site Profiles	1	null
MAX_HepG2_hg19_2	ENCODE Transcription Factor Binding Site Profiles	1	null
TAF1_MCF-7_hg19_1	ENCODE Transcription Factor Binding Site Profiles	1	null
orbital frontal cortex_4 mos_M_12889	Allen Brain Atlas Developing Human Brain Tissue Gene Expression Profiles by RNA-seq	-1	-1.28034
positive regulation of hemopoiesis	GO Biological Process Annotations 2015	1	null
central nervous system	TISSUES Experimental Tissue Protein Expression Evidence Scores	1	0.766457
EZH2_T-cell acute lymphoblastic leukemia_hg19_1	ENCODE Transcription Factor Binding Site Profiles	1	null
hsa-miR-519a	TargetScan Predicted Conserved microRNA Targets	1	0.348832
H3K4me3_H7_hg19_1	ENCODE Histone Modification Site Profiles	1	null
SNU-668	Klijn et al., Nat. Biotechnol., 2015 Cell Line Gene CNV Profiles	1	0.892487
H3K4me3_H1 Derived Mesenchymal Stem Cells	Roadmap Epigenomics Histone Modification Site Profiles	1	null
Declive (VI), granular layer	Allen Brain Atlas Adult Mouse Brain Tissue Gene Expression Profiles	1	1.70673
hsa-miR-1299	TargetScan Predicted Conserved microRNA Targets	1	0.670641
H3K4me3_Panc1_hg19_3	ENCODE Histone Modification Site Profiles	1	null
regulation of metabolic process	GO Biological Process Annotations 2015	1	null
intracellular membrane-bounded organelle	GO Cellular Component Annotations 2015	1	null
Terbinafine	DeepCoverMOA Drug Mechanisms of Action	-1	-0.46
VI, right, paravermis	Allen Brain Atlas Adult Human Brain Tissue Gene Expression Profiles	-1	-1.42733
primary auditory cortex (core)_25 pcw_F_12948	Allen Brain Atlas Developing Human Brain Tissue Gene Expression Profiles by RNA-seq	-1	-0.841638
MAZ	ENCODE Transcription Factor Targets	1	null
GTEX-X261-0011-R5A-SM-3NMB4	GTEx Tissue Sample Gene Expression Profiles	-1	-0.962703
GTEX-QV44-0008-SM-447AX	GTEx Tissue Sample Gene Expression Profiles	1	1.38081
external granular (germinal) layer of lower rhombic lip	Allen Brain Atlas Prenatal Human Brain Tissue Gene Expression Profiles	1	1.11166
GTEX-QLQW-1426-SM-2S1QU	GTEx Tissue Sample Gene Expression Profiles	1	0.846896
SG in dorsolateral prefrontal cortex	Allen Brain Atlas Prenatal Human Brain Tissue Gene Expression Profiles	1	0.844493
UACC-893	Klijn et al., Nat. Biotechnol., 2015 Cell Line Gene Expression Profiles	-1	-1.86648
TCF3_myocyte_mm9_1	ENCODE Transcription Factor Binding Site Profiles	1	null
Precancerous Conditions	CTD Gene-Disease Associations	1	1.29348
POLR2A_GM18951_hg19_1	ENCODE Transcription Factor Binding Site Profiles	1	null
medial amygdala, posteroventral part	Allen Brain Atlas Adult Mouse Brain Tissue Gene Expression Profiles	1	1.0101
embryoday8.5	BioGPS Mouse Cell Type and Tissue Gene Expression Profiles	-1	-0.850476
Head and Neck squamous cell carcinoma_HNSC_TCGA-CV-7178-01A-21R-2016-07	TCGA Signatures of Differentially Expressed Genes for Tumors	1	null
DMS79	CCLE Cell Line Gene Expression Profiles	-1	-1.73319
CTCF_MCF-7_hg19_2	ENCODE Transcription Factor Binding Site Profiles	1	null
YY1_GM12892_hg19_1	ENCODE Transcription Factor Binding Site Profiles	1	null
H3ac_myocyte_mm9_1	ENCODE Histone Modification Site Profiles	1	null
male reproductive gland	TISSUES Curated Tissue Protein Expression Evidence Scores	1	null
MDA-MB-468	Klijn et al., Nat. Biotechnol., 2015 Cell Line Gene Expression Profiles	-1	-1.00312
IZ in posterosuperior (dorsal) parietal cortex	Allen Brain Atlas Prenatal Human Brain Tissue Gene Expression Profiles	-1	-1.26662
HCC827	Klijn et al., Nat. Biotechnol., 2015 Cell Line Gene CNV Profiles	-1	-0.922472
MXI1	ENCODE Transcription Factor Targets	1	null
Fibrosis	CTD Gene-Disease Associations	1	1.47167
Torcetrapib	DeepCoverMOA Drug Mechanisms of Action	-1	-1.71
Head and Neck squamous cell carcinoma_HNSC_TCGA-H7-8501-01A-11R-2403-07	TCGA Signatures of Differentially Expressed Genes for Tumors	1	null
NCI-H716	Klijn et al., Nat. Biotechnol., 2015 Cell Line Gene CNV Profiles	-1	-0.882857
POLR2A_GM19193_hg19_1	ENCODE Transcription Factor Binding Site Profiles	1	null
mitochondrion	LOCATE Predicted Protein Localization Annotations	1	null
GTEX-PWOO-1026-SM-48TCN	GTEx Tissue Sample Gene Expression Profiles	1	1.02336
hsa-miR-4771	TargetScan Predicted Conserved microRNA Targets	1	0.336728
H3K9ac_fibroblast of dermis_hg19_1	ENCODE Histone Modification Site Profiles	1	null
H3K9ac_HeLa-S3_hg19_1	ENCODE Histone Modification Site Profiles	1	null
Cervical squamous cell carcinoma and endocervical adenocarcinoma_CESC_TCGA-DS-A1OC-01A-11R-A14Y-07	TCGA Signatures of Differentially Expressed Genes for Tumors	1	null
NELFE_MEL cell line_mm9_1	ENCODE Transcription Factor Binding Site Profiles	1	null
USF1	ENCODE Transcription Factor Targets	1	null
H4K20me1_keratinocyte_hg19_1	ENCODE Histone Modification Site Profiles	1	null
GTEX-P78B-0526-SM-2I5F7	GTEx Tissue Sample Gene Expression Profiles	1	0.950191
MECOM-23826213-KASUMI-MOUSE	ChEA Transcription Factor Targets 2022	1	null
Bladder Urothelial Carcinoma_BLCA_TCGA-E7-A97Q-01A-11R-A38B-07	TCGA Signatures of Differentially Expressed Genes for Tumors	1	null
H3K4me3_bone marrow_mm9_1	ENCODE Histone Modification Site Profiles	1	null
MDA-MB-468	Klijn et al., Nat. Biotechnol., 2015 Cell Line Gene CNV Profiles	-1	-0.96122
hsa-miR-548j	TargetScan Predicted Nonconserved microRNA Targets	1	1.40969
PAX5_GM12878_hg19_1	ENCODE Transcription Factor Binding Site Profiles	1	null
H3K4me3_megakaryocyte_mm9_1	ENCODE Histone Modification Site Profiles	1	null
GTEX-R55C-0626-SM-2TF4Q	GTEx Tissue Sample Gene Expression Profiles	1	1.65573
Brain Lower Grade Glioma_LGG_TCGA-DU-5847-01A-11R-1708-07	TCGA Signatures of Differentially Expressed Genes for Tumors	1	null
GTEX-PWN1-0008-SM-48TEA	GTEx Tissue Sample Gene Expression Profiles	1	1.31934
ABT-199	DeepCoverMOA Drug Mechanisms of Action	1	0.64
CAL120	CCLE Cell Line Gene Expression Profiles	1	2.09381
H3K4me1_HCT116_hg19_1	ENCODE Histone Modification Site Profiles	1	null
Kidney renal clear cell carcinoma_KIRC_TCGA-A3-3313-01A-02R-1325-07	TCGA Signatures of Differentially Expressed Genes for Tumors	1	null
TRIM28_HEK293_hg19_1	ENCODE Transcription Factor Binding Site Profiles	1	null
BC-1	COSMIC Cell Line Gene CNV Profiles	1	2.06989
FOXM1	ENCODE Transcription Factor Targets	1	null
frontal pole, left, medial aspect	Allen Brain Atlas Adult Human Brain Tissue Gene Expression Profiles	-1	-1.32765
Inferior colliculus, external nucleus	Allen Brain Atlas Adult Mouse Brain Tissue Gene Expression Profiles	1	1.0378
hsa-miR-924	TargetScan Predicted Conserved microRNA Targets	1	0.15008
MAFF_K562_hg19_1	ENCODE Transcription Factor Binding Site Profiles	1	null
EZH2_endothelial cell of umbilical vein_hg19_1	ENCODE Transcription Factor Binding Site Profiles	1	null
CUX1	ENCODE Transcription Factor Targets	1	null
GTEX-X638-0005-SM-47JX6	GTEx Tissue Sample Gene Expression Profiles	-1	-1.3784
H3K4me3_CH12.LX_mm9_1	ENCODE Histone Modification Site Profiles	1	null
HY-50713	DeepCoverMOA Drug Mechanisms of Action	1	0.47
Cervical squamous cell carcinoma and endocervical adenocarcinoma_CESC_TCGA-VS-A8EC-01A-11R-A36F-07	TCGA Signatures of Differentially Expressed Genes for Tumors	1	null
Drug-Induced Liver Injury	CTD Gene-Disease Associations	1	1.59474
CTCF_BJ_hg19_1	ENCODE Transcription Factor Binding Site Profiles	1	null
OCI-M1	Klijn et al., Nat. Biotechnol., 2015 Cell Line Gene CNV Profiles	1	1.09574
OV-90	Klijn et al., Nat. Biotechnol., 2015 Cell Line Gene Expression Profiles	-1	-1.24715
GTEX-O5YW-0006-SM-3LK6E	GTEx Tissue Sample Gene Expression Profiles	-1	-1.79901
TET1-21451524-MESCS-MOUSE	ChEA Transcription Factor Targets 2022	1	null
USF1_SK-N-SH_hg19_1	ENCODE Transcription Factor Binding Site Profiles	1	null
H3K4me1_A549_hg19_2	ENCODE Histone Modification Site Profiles	1	null
ARID3A	ENCODE Transcription Factor Targets	1	null
superficial stratum of r4BM	Allen Brain Atlas Adult Mouse Brain Tissue Gene Expression Profiles	-1	-1.45564
Liver hepatocellular carcinoma_LIHC_TCGA-G3-A5SL-01A-11R-A27V-07	TCGA Signatures of Differentially Expressed Genes for Tumors	1	null
hsa-miR-4801	TargetScan Predicted Nonconserved microRNA Targets	1	0.880544
YY1_SK-N-SH_hg19_1	ENCODE Transcription Factor Binding Site Profiles	1	null
cerebellar cortex_23 yrs_M_12300	Allen Brain Atlas Developing Human Brain Tissue Gene Expression Profiles by RNA-seq	-1	-0.852241
NCIH2291	DepMap CRISPR Gene Dependency	1	3.3451
rara_21299862_mcf7_lof_human__gds4065	GEO Signatures of Differentially Expressed Genes for Transcription Factor Perturbations	-1	-0.7126
Bestatin	DeepCoverMOA Drug Mechanisms of Action	1	0.71
integral component of membrane	GO Cellular Component Annotations 2015	1	null
GTEX-OXRL-0326-SM-2I3F2	GTEx Tissue Sample Gene Expression Profiles	-1	-1.05615
H3K4me3_thymus_mm9_1	ENCODE Histone Modification Site Profiles	1	null
Uterine Carcinosarcoma_UCS_TCGA-N8-A4PQ-01A-11R-A28V-07	TCGA Signatures of Differentially Expressed Genes for Tumors	1	null
GTEX-WH7G-1026-SM-4LVML	GTEx Tissue Sample Gene Expression Profiles	1	1.22512
RAD21_SK-N-SH_hg19_1	ENCODE Transcription Factor Binding Site Profiles	1	null
GTEX-QLQ7-0726-SM-2I5G2	GTEx Tissue Sample Gene Expression Profiles	1	1.17719
NB13	DepMap CRISPR Gene Dependency	1	2.94776
PMC3569742__F6	PFOCR Pathway Figure Associations 2024	1	null
GTEX-Q734-0008-SM-48U2I	GTEx Tissue Sample Gene Expression Profiles	1	1.3896
5-Ethynyluracil	DeepCoverMOA Drug Mechanisms of Action	-1	-0.34
dorsolateral prefrontal cortex_4 mos_M_12889	Allen Brain Atlas Developing Human Brain Tissue Gene Expression Profiles by RNA-seq	-1	-0.875033
proteasome regulatory particle	COMPARTMENTS Text-mining Protein Localization Evidence Scores	1	0.248578
D283MED	CCLE Cell Line Gene Expression Profiles	1	1.71328
RELA_GM15510_hg19_1	ENCODE Transcription Factor Binding Site Profiles	1	null
NFKB1-27076634-BEAS2B-HUMAN-LUNG-INFLAMMATION	ChEA Transcription Factor Targets 2022	1	null
H3K4me3_cardiac mesoderm_hg19_1	ENCODE Histone Modification Site Profiles	1	null
VIIIA, right, paravermis	Allen Brain Atlas Adult Human Brain Tissue Gene Expression Profiles	-1	-1.1308
hsa-miR-548h	TargetScan Predicted Nonconserved microRNA Targets	1	1.40969
hsa-miR-548z	TargetScan Predicted Conserved microRNA Targets	1	0.257113
POLR2AphosphoS5_GM12892_hg19_2	ENCODE Transcription Factor Binding Site Profiles	1	null
CORL51	CCLE Cell Line Gene Expression Profiles	-1	-1.70901
CEBPB_HeLa-S3_hg19_1	ENCODE Transcription Factor Binding Site Profiles	1	null
Brain Lower Grade Glioma_LGG_TCGA-QH-A6CX-01A-11R-A32Q-07	TCGA Signatures of Differentially Expressed Genes for Tumors	1	null
SP1_K562_hg19_1	ENCODE Transcription Factor Binding Site Profiles	1	null
Nucleus y	Allen Brain Atlas Adult Mouse Brain Tissue Gene Expression Profiles	-1	-1.45564
island of Calleja major	Allen Brain Atlas Adult Mouse Brain Tissue Gene Expression Profiles	1	1.43592
H3K4me3_placenta_mm9_1	ENCODE Histone Modification Site Profiles	1	null
Lung squamous cell carcinoma_LUSC_TCGA-60-2724-01A-01R-0851-07	TCGA Signatures of Differentially Expressed Genes for Tumors	1	null
H3K4me3_MCF-7_hg19_2	ENCODE Histone Modification Site Profiles	1	null
ZINC6198410	DeepCoverMOA Drug Mechanisms of Action	1	0.33
H3K4me3_BJ_hg19_2	ENCODE Histone Modification Site Profiles	1	null
GTEX-XMD1-0526-SM-4AT4Z	GTEx Tissue Sample Gene Expression Profiles	1	0.89123
hsa-miR-4672	TargetScan Predicted Conserved microRNA Targets	1	0.632343
BICR 78	Klijn et al., Nat. Biotechnol., 2015 Cell Line Gene Expression Profiles	-1	-0.827718
red nucleus, right	Allen Brain Atlas Adult Human Brain Tissue Gene Expression Profiles	1	1.01179
GTEX-WWYW-0005-SM-3NB3K	GTEx Tissue Sample Gene Expression Profiles	-1	-1.86188
SALL4-22934838-CD34+-HUMAN	ChEA Transcription Factor Binding Site Profiles	1	null
Liver hepatocellular carcinoma_LIHC_TCGA-DD-A4NQ-01A-21R-A28V-07	TCGA Signatures of Differentially Expressed Genes for Tumors	1	null
Bombesin	DeepCoverMOA Drug Mechanisms of Action	-1	-0.25
MAX_K562_hg19_1	ENCODE Transcription Factor Binding Site Profiles	1	null
SETDB1	ChEA Transcription Factor Targets	1	null
ZFX-18555785-MESCS-MOUSE	ChEA Transcription Factor Targets 2022	1	null
H3K27ac_HCT116_hg19_1	ENCODE Histone Modification Site Profiles	1	null
GTEX-P4PQ-0008-SM-48TDX	GTEx Tissue Sample Gene Expression Profiles	1	0.888825
connective tissue	TISSUES Text-mining Tissue Protein Expression Evidence Scores	1	0.063546
H3K9ac_K562_hg19_2	ENCODE Histone Modification Site Profiles	1	null
MYC_K562_hg19_2	ENCODE Transcription Factor Binding Site Profiles	1	null
POLR2AphosphoS5_H1-hESC_hg19_2	ENCODE Transcription Factor Binding Site Profiles	1	null
hsa-miR-627	TargetScan Predicted Conserved microRNA Targets	1	0.274552
ZKSCAN1_HeLa-S3_hg19_1	ENCODE Transcription Factor Binding Site Profiles	1	null
UACC257	CCLE Cell Line Gene Expression Profiles	1	1.43085
dorsal thalamus_12 pcw_F_12960	Allen Brain Atlas Developing Human Brain Tissue Gene Expression Profiles by RNA-seq	1	0.887888
REST-19997604-NEURONS-MOUSE	ChEA Transcription Factor Targets 2022	1	null
EFM192A	CCLE Cell Line Gene CNV Profiles	1	2.4652
REST	ENCODE Transcription Factor Targets	1	null
POLR2A_HEK293_hg19_1	ENCODE Transcription Factor Binding Site Profiles	1	null
CW-2	Klijn et al., Nat. Biotechnol., 2015 Cell Line Gene Mutation Profiles	1	null
Skin Cutaneous Melanoma_SKCM_TCGA-FR-A2OS-01A-11R-A21D-07	TCGA Signatures of Differentially Expressed Genes for Tumors	1	null
TCF7L2	ENCODE Transcription Factor Targets	1	null
parathyroid gland	HPA Tissue Protein Expression Profiles	1	0.919228
hsa-miR-3609	TargetScan Predicted Conserved microRNA Targets	1	0.181316
hsa-miR-548ae	TargetScan Predicted Conserved microRNA Targets	1	1.11641
amygdaloid complex_17 pcw_F_12880	Allen Brain Atlas Developing Human Brain Tissue Gene Expression Profiles by RNA-seq	-1	-1.06593
BACH1_K562_hg19_1	ENCODE Transcription Factor Binding Site Profiles	1	null
CTCF_cardiac muscle cell_hg19_2	ENCODE Transcription Factor Binding Site Profiles	1	null
GTEX-RU1J-1026-SM-46MUR	GTEx Tissue Sample Gene Expression Profiles	1	1.28802
hsa-miR-520a-3p	TargetScan Predicted Conserved microRNA Targets	1	0.348832
H3K4me3_osteoblast_hg19_1	ENCODE Histone Modification Site Profiles	1	null
A_CA_04_2009_7dayMOI-10^5_None_GSE37569	GEO Signatures of Differentially Expressed Genes for Viral Infections	-1	-1.69833
SETDB1	ENCODE Transcription Factor Targets	1	null
choroid plexus of the fourth ventricle	Allen Brain Atlas Prenatal Human Brain Tissue Gene Expression Profiles	1	1.63135
CTCF_fibroblast of pedal digit skin_hg19_2	ENCODE Transcription Factor Binding Site Profiles	1	null
HL-60	Klijn et al., Nat. Biotechnol., 2015 Cell Line Gene Expression Profiles	-1	-1.05448
VIIIA, left, lateral hemisphere	Allen Brain Atlas Adult Human Brain Tissue Gene Expression Profiles	-1	-0.876367
inner SZ in frontal polar cortex	Allen Brain Atlas Prenatal Human Brain Tissue Gene Expression Profiles	-1	-0.824598
IM-95M	Klijn et al., Nat. Biotechnol., 2015 Cell Line Gene Expression Profiles	1	1.31527
CTCF_GM12874_hg19_1	ENCODE Transcription Factor Binding Site Profiles	1	null
H3K27ac_liver_mm9_1	ENCODE Histone Modification Site Profiles	1	null
Brain Lower Grade Glioma_LGG_TCGA-DU-7301-01A-11R-2090-07	TCGA Signatures of Differentially Expressed Genes for Tumors	1	null
A3KAW	CCLE Cell Line Gene CNV Profiles	-1	-2.35637
H3K4me3_B cell_hg19_2	ENCODE Histone Modification Site Profiles	1	null
PPARG-20887899-3T3-L1-MOUSE	ChEA Transcription Factor Targets 2022	1	null
Kidney Diseases	CTD Gene-Disease Associations	1	1.52262
Lobules IV-V, molecular layer	Allen Brain Atlas Adult Mouse Brain Tissue Gene Expression Profiles	1	1.88192
Tipifarnib	DeepCoverMOA Drug Mechanisms of Action	1	0.63
CALU-3	Klijn et al., Nat. Biotechnol., 2015 Cell Line Gene CNV Profiles	-1	-0.96122
primary somatosensory cortex (area S1, areas 3,1,2)_10 mos_M_12977	Allen Brain Atlas Developing Human Brain Tissue Gene Expression Profiles by RNA-seq	1	1.4909
GTEX-SJXC-0005-SM-2XCE7	GTEx Tissue Sample Gene Expression Profiles	-1	-1.39723
leukocyte	TISSUES Text-mining Tissue Protein Expression Evidence Scores	1	0.057604
Sarcoma_SARC_TCGA-DX-A6B9-01A-12R-A32Q-07	TCGA Signatures of Differentially Expressed Genes for Tumors	1	null
PU.1-20513432-BCELLS-MOUSE	ChEA Transcription Factor Targets 2022	1	null
valproic acid_homo sapiens_gpl6883_gse26940	GEO Signatures of Differentially Expressed Genes for Small Molecules	1	null
substantia nigra, pars reticulata, left	Allen Brain Atlas Adult Human Brain Tissue Gene Expression Profiles	1	1.04671
Principal sensory nucleus of the trigeminal	Allen Brain Atlas Adult Mouse Brain Tissue Gene Expression Profiles	-1	-1.78256
NCIH2052	CCLE Cell Line Gene CNV Profiles	1	1.4454
Simple lobule, molecular layer	Allen Brain Atlas Adult Mouse Brain Tissue Gene Expression Profiles	1	1.44436
CTCF_embryonic fibroblast_mm9_1	ENCODE Transcription Factor Binding Site Profiles	1	null
SCLC-21H	Klijn et al., Nat. Biotechnol., 2015 Cell Line Gene CNV Profiles	-1	-1.56652
regulation of developmental process	GO Biological Process Annotations 2015	1	null
GTEX-XMD1-2826-SM-4AT5F	GTEx Tissue Sample Gene Expression Profiles	-1	-0.935306
GTEX-R55C-0005-SM-3GAE9	GTEx Tissue Sample Gene Expression Profiles	-1	-1.06194
r3 part of trigeminal transition zone	Allen Brain Atlas Adult Mouse Brain Tissue Gene Expression Profiles	-1	-1.98542
SARS-ddORF6_72Hour_23935999_GSE47961	GEO Signatures of Differentially Expressed Genes for Viral Infections	-1	-1.50327
Hyperglycemia	CTD Gene-Disease Associations	1	1.31746
hsa-miR-217	TargetScan Predicted Nonconserved microRNA Targets	1	1.0155
POLR2AphosphoS5_SK-N-MC_hg19_2	ENCODE Transcription Factor Binding Site Profiles	1	null
SIN3A_PFSK-1_hg19_2	ENCODE Transcription Factor Binding Site Profiles	1	null
TBX2-33478486-IMR90-HUMAN-LUNG	ChEA Transcription Factor Targets 2022	1	null
H3K4me3_cardiac fibroblast_hg19_2	ENCODE Histone Modification Site Profiles	1	null
CTCF_keratinocyte_hg19_3	ENCODE Transcription Factor Binding Site Profiles	1	null
HCC1143	Klijn et al., Nat. Biotechnol., 2015 Cell Line Gene Expression Profiles	1	0.932209
increased bone mass	MGI Mouse Phenotype Associations 2023	1	null
H3K4me3_choroid plexus epithelial cell_hg19_1	ENCODE Histone Modification Site Profiles	1	null
POLR2A_K562_hg19_2	ENCODE Transcription Factor Binding Site Profiles	1	null
ZMIZ1_K562_hg19_1	ENCODE Transcription Factor Binding Site Profiles	1	null
Eplerenone	DeepCoverMOA Drug Mechanisms of Action	1	0.43
subbrachial nucleus, rostral part	Allen Brain Atlas Adult Mouse Brain Tissue Gene Expression Profiles	1	1.55637
abnormal homeostasis	MPO Gene-Phenotype Associations	1	null
GTEX-PWN1-2526-SM-48TDS	GTEx Tissue Sample Gene Expression Profiles	1	0.919883
hsa-miR-320c	TargetScan Predicted Conserved microRNA Targets	1	0.419947
LOUCY	CCLE Cell Line Gene Expression Profiles	-1	-2.0201
GTEX-OOBK-0005-SM-2YUMG	GTEx Tissue Sample Gene Expression Profiles	-1	-1.87191
LNCAPCLONEFGC	DepMap CRISPR Gene Dependency	1	2.21691
superficial stratum of r8Lim	Allen Brain Atlas Adult Mouse Brain Tissue Gene Expression Profiles	-1	-2.0425
CTCF_GM12875_hg19_1	ENCODE Transcription Factor Binding Site Profiles	1	null
fluoxetine_mus musculus_gpl1261_gse35761	GEO Signatures of Differentially Expressed Genes for Small Molecules	1	null
regulation of homeostatic process	GO Biological Process Annotations 2015	1	null
Rhodanine derivative38	DeepCoverMOA Drug Mechanisms of Action	1	0.33
GTEX-XOTO-0006-SM-4B64T	GTEx Tissue Sample Gene Expression Profiles	-1	-2.50971
hsa-miR-146b-3p	TargetScan Predicted Nonconserved microRNA Targets	1	0.843347
Spinal nucleus of the trigeminal, oral part, caudal dorsomedial part	Allen Brain Atlas Adult Mouse Brain Tissue Gene Expression Profiles	-1	-1.10579
SREBF2	ChEA Transcription Factor Targets	1	null
regulation of immune system process	GO Biological Process Annotations 2015	1	null
GTEX-UJHI-0006-SM-3DB8H	GTEx Tissue Sample Gene Expression Profiles	-1	-1.23191
superficial stratum of r1BI	Allen Brain Atlas Adult Mouse Brain Tissue Gene Expression Profiles	1	2.29293
ELF1_GM12878_hg19_2	ENCODE Transcription Factor Binding Site Profiles	1	null
RNF2_K562_hg19_1	ENCODE Transcription Factor Binding Site Profiles	1	null
CTCF_myotube_hg19_1	ENCODE Transcription Factor Binding Site Profiles	1	null
POLR2A_MCF-7_hg19_1	ENCODE Transcription Factor Binding Site Profiles	1	null
QGP-1	Klijn et al., Nat. Biotechnol., 2015 Cell Line Gene Expression Profiles	-1	-0.922585
CCNT2	ENCODE Transcription Factor Targets	1	null
ChIP_MYC_18555785	ESCAPE Omics Signatures of Genes and Proteins for Stem Cells	1	null
GTEX-RN64-0008-SM-48FEZ	GTEx Tissue Sample Gene Expression Profiles	1	1.42298
melanoma cell	TISSUES Curated Tissue Protein Expression Evidence Scores	1	null
Head and Neck squamous cell carcinoma_HNSC_TCGA-CV-7243-01A-11R-2016-07	TCGA Signatures of Differentially Expressed Genes for Tumors	1	null
Lobule II	Allen Brain Atlas Adult Mouse Brain Tissue Gene Expression Profiles	1	1.39037
E2F4	ENCODE Transcription Factor Targets	1	null
GTEX-OXRN-0005-SM-2I5EU	GTEx Tissue Sample Gene Expression Profiles	-1	-1.88139
H3K9ac_CD14-positive monocyte_hg19_1	ENCODE Histone Modification Site Profiles	1	null
Sarcoma_SARC_TCGA-IE-A3OV-01A-11R-A22K-07	TCGA Signatures of Differentially Expressed Genes for Tumors	1	null
Head and Neck squamous cell carcinoma_HNSC_TCGA-RS-A6TO-01A-32R-A34R-07	TCGA Signatures of Differentially Expressed Genes for Tumors	1	null
GTEX-POYW-0826-SM-2XCEM	GTEx Tissue Sample Gene Expression Profiles	1	1.38611
Pheochromocytoma and Paraganglioma_PCPG_TCGA-QR-A70H-01A-12R-A35K-07	TCGA Signatures of Differentially Expressed Genes for Tumors	1	null
JUND_K562_hg19_1	ENCODE Transcription Factor Binding Site Profiles	1	null
MDA-MB-415	Klijn et al., Nat. Biotechnol., 2015 Cell Line Gene CNV Profiles	-1	-1.14897
Pancreatic adenocarcinoma_PAAD_TCGA-IB-AAUV-01A-11R-A38C-07	TCGA Signatures of Differentially Expressed Genes for Tumors	1	null
GTEX-X4EP-0005-SM-3P5ZE	GTEx Tissue Sample Gene Expression Profiles	-1	-2.02919
POLR2AphosphoS5_SK-N-SH_hg19_2	ENCODE Transcription Factor Binding Site Profiles	1	null
blast cell	TISSUES Text-mining Tissue Protein Expression Evidence Scores	1	0.092114
NFIC	ENCODE Transcription Factor Targets	1	null
H3K4me3_fibroblast of pedal digit skin_hg19_2	ENCODE Histone Modification Site Profiles	1	null
ETS1_CH12.LX_mm9_1	ENCODE Transcription Factor Binding Site Profiles	1	null
positive regulation of bone resorption	GO Biological Process Annotations 2015	1	null
PF-3758309	DeepCoverMOA Drug Mechanisms of Action	1	0.84
GTEX-T8EM-0226-SM-3DB7C	GTEx Tissue Sample Gene Expression Profiles	1	3.51968
ABL1_knockdown_137_GSE31534	GEO Signatures of Differentially Expressed Genes for Kinase Perturbations	1	1.31759
CBX3	ENCODE Transcription Factor Targets	1	null
NCI-H2595	Klijn et al., Nat. Biotechnol., 2015 Cell Line Gene CNV Profiles	-1	-1.26591
IMR32	DepMap CRISPR Gene Dependency	1	4.79663
TBP_K562_hg19_1	ENCODE Transcription Factor Binding Site Profiles	1	null
intracellular part	LOCATE Predicted Protein Localization Annotations	1	null
17616640-TableS1	GeneSigDB Published Gene Signatures	1	null
Medial amygdalar nucleus, posterodorsal part, sublayer c	Allen Brain Atlas Adult Mouse Brain Tissue Gene Expression Profiles	1	1.03851
H3K4me2_osteoblast_hg19_1	ENCODE Histone Modification Site Profiles	1	null
inner SZ in midlateral extrastriate cortex	Allen Brain Atlas Prenatal Human Brain Tissue Gene Expression Profiles	-1	-1.1537
septopallidal core nucleus	Allen Brain Atlas Adult Mouse Brain Tissue Gene Expression Profiles	1	1.0399
striatum_19 yrs_F_12832	Allen Brain Atlas Developing Human Brain Tissue Gene Expression Profiles by RNA-seq	1	0.877266
hsa-miR-4719	TargetScan Predicted Conserved microRNA Targets	1	0.107229
Cervical squamous cell carcinoma and endocervical adenocarcinoma_CESC_TCGA-VS-A953-01A-11R-A38B-07	TCGA Signatures of Differentially Expressed Genes for Tumors	1	null
hsa-miR-548a-3p	TargetScan Predicted Nonconserved microRNA Targets	1	1.55165
Bladder Urothelial Carcinoma_BLCA_TCGA-K4-A3WU-01B-11R-A23N-07	TCGA Signatures of Differentially Expressed Genes for Tumors	1	null
POLR2AphosphoS5_HCT116_hg19_2	ENCODE Transcription Factor Binding Site Profiles	1	null
interstitial nucleus of Cajal, left	Allen Brain Atlas Adult Human Brain Tissue Gene Expression Profiles	1	0.887593
H3K27ac_cerebellum_mm9_1	ENCODE Histone Modification Site Profiles	1	null
hsa-miR-548ak	TargetScan Predicted Nonconserved microRNA Targets	1	1.40969
YY1_GM12891_hg19_2	ENCODE Transcription Factor Binding Site Profiles	1	null
USF2_GM12878_hg19_1	ENCODE Transcription Factor Binding Site Profiles	1	null
STK11_knockout_278_GSE34866	GEO Signatures of Differentially Expressed Genes for Kinase Perturbations	1	0.991657
GTEX-RU72-2226-SM-46MUE	GTEx Tissue Sample Gene Expression Profiles	1	1.20611
hsa-miR-519b-3p	TargetScan Predicted Conserved microRNA Targets	1	0.348832
endoplasmic reticulum	COMPARTMENTS Curated Protein Localization Evidence Scores	1	0.03318
18713946-TableS3	GeneSigDB Published Gene Signatures	1	null
NBTGR	DeepCoverMOA Drug Mechanisms of Action	1	0.92
Anastrozole	DeepCoverMOA Drug Mechanisms of Action	-1	-0.47
POLR2A_GM12878_hg19_3	ENCODE Transcription Factor Binding Site Profiles	1	null
GTEX-WFG8-0008-SM-4LVN6	GTEx Tissue Sample Gene Expression Profiles	1	1.57146
r9 part of the inferior olive	Allen Brain Atlas Adult Mouse Brain Tissue Gene Expression Profiles	1	1.10712
TAF1_PFSK-1_hg19_2	ENCODE Transcription Factor Binding Site Profiles	1	null
Field CA3, stratum lacunosum-moleculare	Allen Brain Atlas Adult Mouse Brain Tissue Gene Expression Profiles	-1	-1.26469
Progression Of Prostate Cancer	DisGeNET Gene-Disease Associations	1	null
NCIH209	CCLE Cell Line Gene Expression Profiles	-1	-2.23938
GTEX-U3ZG-0006-SM-47JWX	GTEx Tissue Sample Gene Expression Profiles	-1	-1.64068
GTEX-VUSG-0426-SM-3GIKD	GTEx Tissue Sample Gene Expression Profiles	1	1.55701
CTCF_A549_hg19_5	ENCODE Transcription Factor Binding Site Profiles	1	null
increased bone mineral density	MGI Mouse Phenotype Associations 2023	1	null
Lateral dorsal nucleus of thalamus	Allen Brain Atlas Adult Mouse Brain Tissue Gene Expression Profiles	-1	-1.78359
COR-L47	Klijn et al., Nat. Biotechnol., 2015 Cell Line Gene Expression Profiles	-1	-0.88765
Prostate adenocarcinoma_PRAD_TCGA-EJ-7123-11A-01R-1965-07	TCGA Signatures of Differentially Expressed Genes for Tumors	1	null
posterior (caudal) superior temporal cortex (area 22c)_11 yrs_F_12289	Allen Brain Atlas Developing Human Brain Tissue Gene Expression Profiles by RNA-seq	1	1.31623
GATA1-30185409-K562-MOUSE-BONEMARROW-LEUKEMIA	ChEA Transcription Factor Targets 2022	1	null
SG in medial temporal-occipital cortex	Allen Brain Atlas Prenatal Human Brain Tissue Gene Expression Profiles	1	0.887235
GTEX-T6MO-0006-SM-32QOU	GTEx Tissue Sample Gene Expression Profiles	-1	-1.23374
CREB1_K562_hg19_1	ENCODE Transcription Factor Binding Site Profiles	1	null
r2 part of principal trigeminal sensory nucleus	Allen Brain Atlas Adult Mouse Brain Tissue Gene Expression Profiles	-1	-1.0463
Nucleus of Roller	Allen Brain Atlas Adult Mouse Brain Tissue Gene Expression Profiles	-1	-1.15532
CTCF_HEK293_hg19_1	ENCODE Transcription Factor Binding Site Profiles	1	null
Liver hepatocellular carcinoma_LIHC_TCGA-ZS-A9CG-01A-11R-A37K-07	TCGA Signatures of Differentially Expressed Genes for Tumors	1	null
KYSE-30	Klijn et al., Nat. Biotechnol., 2015 Cell Line Gene CNV Profiles	1	0.956615
Kidney renal clear cell carcinoma_KIRC_TCGA-AK-3428-01A-02R-1277-07	TCGA Signatures of Differentially Expressed Genes for Tumors	1	null
membrane part	COMPARTMENTS Curated Protein Localization Evidence Scores	1	0.098109
H3K27me3_CH12.LX_mm9_3	ENCODE Transcription Factor Binding Site Profiles	1	null
AQ-390/43364023	DeepCoverMOA Drug Mechanisms of Action	1	0.24
BT483	Heiser et al., PNAS, 2011 Cell Line Gene Expression Profiles	1	1.23918
Abnormalities, Multiple	CTD Gene-Disease Associations	1	1.02933
CTCF_K562_hg19_1	ENCODE Transcription Factor Binding Site Profiles	1	null
E2F6_K562_hg19_3	ENCODE Transcription Factor Binding Site Profiles	1	null
abnormal phagocyte morphology	MPO Gene-Phenotype Associations	1	null
Kidney renal papillary cell carcinoma_KIRP_TCGA-SX-A7SO-01A-11R-A355-07	TCGA Signatures of Differentially Expressed Genes for Tumors	1	null
NCI-H1693	Klijn et al., Nat. Biotechnol., 2015 Cell Line Gene Expression Profiles	1	0.874093
CTCF_endothelial cell of umbilical vein_hg19_1	ENCODE Transcription Factor Binding Site Profiles	1	null
hsa-miR-4753-5p	TargetScan Predicted Conserved microRNA Targets	1	0.072324
HCFC1_K562_hg19_1	ENCODE Transcription Factor Binding Site Profiles	1	null
osteoclast	TISSUES Text-mining Tissue Protein Expression Evidence Scores	1	0.724041
ESR1-21235772-MCF-7-HUMAN	ChEA Transcription Factor Targets 2022	1	null
PPARG-20887899-3T3-L1 PREADIPOCYTE CELLS-MOUSE	ChEA Transcription Factor Binding Site Profiles	1	null
Hypertension	CTD Gene-Disease Associations	1	1.05573
hsa-miR-3163	TargetScan Predicted Conserved microRNA Targets	1	0.011888
H3K27ac_A549_hg19_2	ENCODE Histone Modification Site Profiles	1	null
Lung adenocarcinoma_LUAD_TCGA-49-6745-11A-01R-1858-07	TCGA Signatures of Differentially Expressed Genes for Tumors	1	null
posteroventral (inferior) parietal cortex_21 yrs_F_13057	Allen Brain Atlas Developing Human Brain Tissue Gene Expression Profiles by RNA-seq	1	1.23695
MZ in midinferior temporal cortex	Allen Brain Atlas Prenatal Human Brain Tissue Gene Expression Profiles	1	0.926226
ChIP_SALL4_18804426	ESCAPE Omics Signatures of Genes and Proteins for Stem Cells	1	null
SMC3_HepG2_hg19_1	ENCODE Transcription Factor Binding Site Profiles	1	null
A-Vietnam-1203_CIP048_RG3-2004(H5N1)PB1-F2del_7day-MOI-10^3_None_GSE43302	GEO Signatures of Differentially Expressed Genes for Viral Infections	-1	-1.97881
POLR2AphosphoS5_GM12892_hg19_1	ENCODE Transcription Factor Binding Site Profiles	1	null
HCT-8	Klijn et al., Nat. Biotechnol., 2015 Cell Line Gene Mutation Profiles	1	null
ZC3H11A_K562_hg19_1	ENCODE Transcription Factor Binding Site Profiles	1	null
mRNA_EP400_22196727	ESCAPE Omics Signatures of Genes and Proteins for Stem Cells	-1	null
POLR2AphosphoS5_neural cell_hg19_1	ENCODE Transcription Factor Binding Site Profiles	1	null
CTCF_Caco-2_hg19_2	ENCODE Transcription Factor Binding Site Profiles	1	null
immune system phenotype	MPO Gene-Phenotype Associations	1	null
POLR2AphosphoS5_GM12878_hg19_1	ENCODE Transcription Factor Binding Site Profiles	1	null
inner SZ in dorsomedial parietal cortex (area 7m)	Allen Brain Atlas Prenatal Human Brain Tissue Gene Expression Profiles	-1	-0.980797
H3K27ac_fibroblast of lung_hg19_1	ENCODE Histone Modification Site Profiles	1	null
H3K4me3_fibroblast of gingiva_hg19_1	ENCODE Histone Modification Site Profiles	1	null
H3K4me3_cardiac fibroblast_hg19_3	ENCODE Histone Modification Site Profiles	1	null
GTEX-X585-0011-R11B-SM-46MUZ	GTEx Tissue Sample Gene Expression Profiles	-1	-0.889443
GTEX-T5JW-0005-SM-3GADE	GTEx Tissue Sample Gene Expression Profiles	-1	-1.56237
SMAD2_01_351	KnockTF Gene Expression Profiles with Transcription Factor Perturbations	-1	-0.78953
Infralimbic area	Allen Brain Atlas Adult Mouse Brain Tissue Gene Expression Profiles	1	1.07415
hsa-miR-623	TargetScan Predicted Conserved microRNA Targets	1	0.165047
CTCF_LNCaP clone FGC_hg19_2	ENCODE Transcription Factor Binding Site Profiles	1	null
GTEX-R55F-0005-SM-2TF4W	GTEx Tissue Sample Gene Expression Profiles	-1	-1.67187
hsa-miR-4262	TargetScan Predicted Conserved microRNA Targets	1	0.517189
4star	Roadmap Epigenomics Cell and Tissue Gene Expression Profiles	1	1.12718
POLR2A_CH12.LX_mm9_1	ENCODE Transcription Factor Binding Site Profiles	1	null
endocrine gland	TISSUES Curated Tissue Protein Expression Evidence Scores	1	null
UBC	Pathway Commons Protein-Protein Interactions	1	null
CTCF_foreskin fibroblast_hg19_3	ENCODE Transcription Factor Binding Site Profiles	1	null
H4	DepMap CRISPR Gene Dependency	1	2.21635
Fat-mesenchymal stem cell	Tabula Sapiens Gene-Cell Associations	1	3.24108
NCI-H146	Klijn et al., Nat. Biotechnol., 2015 Cell Line Gene Expression Profiles	-1	-0.842696
membrane part	GO Cellular Component Annotations 2015	1	null
CTCF_H1-hESC_hg19_1	ENCODE Transcription Factor Binding Site Profiles	1	null
intracellular part	COMPARTMENTS Text-mining Protein Localization Evidence Scores	1	0.041178
heart	GTEx Tissue Gene Expression Profiles	-1	-0.973443
GTEX-TKQ2-0008-SM-4DM5L	GTEx Tissue Sample Gene Expression Profiles	1	1.32937
hippocampus (hippocampal formation)_21 yrs_F_13057	Allen Brain Atlas Developing Human Brain Tissue Gene Expression Profiles by RNA-seq	1	0.965225
mRNA_MEF2C_19796622	ESCAPE Omics Signatures of Genes and Proteins for Stem Cells	1	null
CTCF-33576154-HUMAN-LIVER-PROSTATECANCER	ChEA Transcription Factor Targets 2022	1	null
hsa-miR-548ac	TargetScan Predicted Conserved microRNA Targets	1	0.241055
GTEX-RTLS-0006-SM-2TF58	GTEx Tissue Sample Gene Expression Profiles	-1	-1.46029
TAF1_neural cell_hg19_2	ENCODE Transcription Factor Binding Site Profiles	1	null
GTEX-OHPK-0326-SM-2HMJO	GTEx Tissue Sample Gene Expression Profiles	-1	-0.831866
hsa-miR-1910	TargetScan Predicted Conserved microRNA Targets	1	0.123298
enhanced osteoblast differentiation	MGI Mouse Phenotype Associations 2023	1	null
Primary somatosensory area, upper limb, layer 1	Allen Brain Atlas Adult Mouse Brain Tissue Gene Expression Profiles	-1	-1.02997
SIN3A_CH12.LX_mm9_1	ENCODE Transcription Factor Binding Site Profiles	1	null
H3K4me3_fibroblast of skin of abdomen_hg19_1	ENCODE Histone Modification Site Profiles	1	null
SG in inferolateral temporal cortex	Allen Brain Atlas Prenatal Human Brain Tissue Gene Expression Profiles	1	1.64558
H3K56ac_H9	Roadmap Epigenomics Histone Modification Site Profiles	1	null
H3K4me3_HeLa-S3_hg19_1	ENCODE Histone Modification Site Profiles	1	null
JMURTK2	DepMap CRISPR Gene Dependency	1	4.80261
superficial stratum of r7BM	Allen Brain Atlas Adult Mouse Brain Tissue Gene Expression Profiles	-1	-1.19232
MYC	ENCODE Transcription Factor Targets	1	null
NAMALWA	DepMap CRISPR Gene Dependency	1	2.09856
H3K18ac_H9	Roadmap Epigenomics Histone Modification Site Profiles	1	null
CTCF_kidney epithelial cell_hg19_1	ENCODE Transcription Factor Binding Site Profiles	1	null
HCC1569	Klijn et al., Nat. Biotechnol., 2015 Cell Line Gene Expression Profiles	1	1.1762
H3K4me3_WI38_hg19_2	ENCODE Histone Modification Site Profiles	1	null
GTEX-QDT8-0006-SM-32PL3	GTEx Tissue Sample Gene Expression Profiles	-1	-1.00902
LS1034	CCLE Cell Line Gene Expression Profiles	-1	-2.0812
hsa-miR-4698	TargetScan Predicted Nonconserved microRNA Targets	1	0.880544
superficial stratum of r9BM	Allen Brain Atlas Adult Mouse Brain Tissue Gene Expression Profiles	1	1.12836
Skin Cutaneous Melanoma_SKCM_TCGA-EE-A2MH-06A-11R-A18S-07	TCGA Signatures of Differentially Expressed Genes for Tumors	1	null
CTCF_GM12878_hg19_3	ENCODE Transcription Factor Binding Site Profiles	1	null
GTEX-XXEK-0005-SM-4BRWJ	GTEx Tissue Sample Gene Expression Profiles	-1	-1.37498
hsa-miR-153	TargetScan Predicted Conserved microRNA Targets	1	0.107229
Bladder Urothelial Carcinoma_BLCA_TCGA-FD-A5BV-01A-11R-A26T-07	TCGA Signatures of Differentially Expressed Genes for Tumors	1	null
creb1_18801183_k562_lof_human_gpl570_gds3487	GEO Signatures of Differentially Expressed Genes for Transcription Factor Perturbations	-1	-2.27632
hsa-miR-3064-5p	TargetScan Predicted Nonconserved microRNA Targets	1	1.40969
Mesothelioma_MESO_TCGA-TS-A7P0-01A-11R-A34F-07	TCGA Signatures of Differentially Expressed Genes for Tumors	1	null
CTCF_MCF-7_hg19_7	ENCODE Transcription Factor Binding Site Profiles	1	null
regulation of hemopoiesis	GO Biological Process Annotations 2015	1	null
hsa-miR-4676-3p	TargetScan Predicted Conserved microRNA Targets	1	0.361556
ZNF384_GM12878_hg19_1	ENCODE Transcription Factor Binding Site Profiles	1	null
ES-I3 Cells	Roadmap Epigenomics Cell and Tissue DNA Methylation Profiles	1	1.07986
GTEX-POYW-0426-SM-2XCEV	GTEx Tissue Sample Gene Expression Profiles	1	0.849183
GTEX-PLZ6-0006-SM-33HBZ	GTEx Tissue Sample Gene Expression Profiles	-1	-0.874882
H3K4me3_fibroblast of lung_hg19_4	ENCODE Histone Modification Site Profiles	1	null
POLR2A_GM12891_hg19_2	ENCODE Transcription Factor Binding Site Profiles	1	null
Cervix - Endocervix	GTEx Tissue Gene Expression Profiles 2023	-1	-1.38381
GTEX-X4LF-0006-SM-3NMCO	GTEx Tissue Sample Gene Expression Profiles	-1	-1.21621
H3K4me3_kidney epithelial cell_hg19_1	ENCODE Histone Modification Site Profiles	1	null
r4 part of trigeminal sensory column	Allen Brain Atlas Adult Mouse Brain Tissue Gene Expression Profiles	-1	-1.09685
H3K27ac_CD14-positive monocyte_hg19_1	ENCODE Histone Modification Site Profiles	1	null
Bladder Urothelial Carcinoma_BLCA_TCGA-GD-A76B-01A-11R-A32O-07	TCGA Signatures of Differentially Expressed Genes for Tumors	1	null
GTEX-RWSA-0005-SM-2XCAO	GTEx Tissue Sample Gene Expression Profiles	-1	-1.72901
CTCF_osteoblast_hg19_1	ENCODE Transcription Factor Binding Site Profiles	1	null
H3K4me3_NB4_hg19_1	ENCODE Histone Modification Site Profiles	1	null
GTEX-S4Z8-0008-SM-33HAZ	GTEx Tissue Sample Gene Expression Profiles	1	1.193
AGO2	Pathway Commons Protein-Protein Interactions	1	null
HCC1419	Klijn et al., Nat. Biotechnol., 2015 Cell Line Gene Expression Profiles	-1	-1.51944
GTEX-WOFL-0006-SM-3TW8K	GTEx Tissue Sample Gene Expression Profiles	-1	-2.50368
CTCF_foreskin fibroblast_hg19_1	ENCODE Transcription Factor Binding Site Profiles	1	null
EN1	JASPAR Predicted Transcription Factor Targets	1	null
Spinal nucleus of the trigeminal, oral part	Allen Brain Atlas Adult Mouse Brain Tissue Gene Expression Profiles	-1	-1.28205
H3K4me1_bone marrow macrophage_mm9_1	ENCODE Histone Modification Site Profiles	1	null
POLR2A_ECC-1_hg19_1	ENCODE Transcription Factor Binding Site Profiles	1	null
H3K4me3_HepG2_hg19_2	ENCODE Histone Modification Site Profiles	1	null
SW 527	Klijn et al., Nat. Biotechnol., 2015 Cell Line Gene Expression Profiles	-1	-0.845827
Pyramus (VIII)	Allen Brain Atlas Adult Mouse Brain Tissue Gene Expression Profiles	1	1.24658
hsa-miR-3130-3p	TargetScan Predicted Nonconserved microRNA Targets	1	0.809003
GTEX-V1D1-0006-SM-3NMCE	GTEx Tissue Sample Gene Expression Profiles	-1	-1.08887
POLR2A_testis_mm9_1	ENCODE Transcription Factor Binding Site Profiles	1	null
ESR1	ChEA Transcription Factor Targets	1	null
GTEX-R3RS-0005-SM-3GAEH	GTEx Tissue Sample Gene Expression Profiles	-1	-1.32424
OVKATE	Klijn et al., Nat. Biotechnol., 2015 Cell Line Gene CNV Profiles	1	0.949705
SP1_A549_hg19_2	ENCODE Transcription Factor Binding Site Profiles	1	null
RFX5	ENCODE Transcription Factor Targets	1	null
GTEX-XBED-0008-SM-47JWO	GTEx Tissue Sample Gene Expression Profiles	1	1.98421
GM12878	Roadmap Epigenomics Cell and Tissue Gene Expression Profiles	1	1.013
CTCF_NB4_hg19_1	ENCODE Transcription Factor Binding Site Profiles	1	null
H3K4me3_astrocyte of the spinal cord_hg19_2	ENCODE Histone Modification Site Profiles	1	null
hsa-miR-4698	TargetScan Predicted Conserved microRNA Targets	1	0.015875
BACH1	ENCODE Transcription Factor Targets	1	null
Lobules IV-V	Allen Brain Atlas Adult Mouse Brain Tissue Gene Expression Profiles	1	1.85065
GTEX-NL3H-0011-R4a-SM-2I3GK	GTEx Tissue Sample Gene Expression Profiles	-1	-0.848249
hsa-miR-573	TargetScan Predicted Conserved microRNA Targets	1	0.085563
layer V of caudal entorhinal cortex	Allen Brain Atlas Prenatal Human Brain Tissue Gene Expression Profiles	1	0.912702
mRNA_KLF4_18264089	ESCAPE Omics Signatures of Genes and Proteins for Stem Cells	1	null
Ginkgolide A	DeepCoverMOA Drug Mechanisms of Action	1	0.49
RNF2	ENCODE Transcription Factor Targets	1	null
GATA2_SH-SY5Y_hg19_1	ENCODE Transcription Factor Binding Site Profiles	1	null
Medial amygdalar nucleus, posterodorsal part, sublayer a	Allen Brain Atlas Adult Mouse Brain Tissue Gene Expression Profiles	1	1.12768
ATF2_H1-hESC_hg19_2	ENCODE Transcription Factor Binding Site Profiles	1	null
Prostate adenocarcinoma_PRAD_TCGA-EJ-5527-01A-01R-1580-07	TCGA Signatures of Differentially Expressed Genes for Tumors	1	null
FOXP2	ENCODE Transcription Factor Targets	1	null
plagl2_17983586_small_intestine_lof_mouse_gpl1261_gds3010	GEO Signatures of Differentially Expressed Genes for Transcription Factor Perturbations	-1	-0.277117
Orbital area, medial part, layer 1	Allen Brain Atlas Adult Mouse Brain Tissue Gene Expression Profiles	1	1.06981
H3K4me1_H1 BMP4 Derived Trophoblast Cultured Cells	Roadmap Epigenomics Histone Modification Site Profiles	1	null
Thiamet G	DeepCoverMOA Drug Mechanisms of Action	1	0.68
AR-19668381-PC3-HUMAN	ChEA Transcription Factor Binding Site Profiles	1	null
TEAD4	ENCODE Transcription Factor Targets	1	null
alvimopan	DeepCoverMOA Drug Mechanisms of Action	1	0.35
GTEX-XOTO-2926-SM-4B65G	GTEx Tissue Sample Gene Expression Profiles	-1	-1.10713
SNU-484	Klijn et al., Nat. Biotechnol., 2015 Cell Line Gene CNV Profiles	-1	-0.981722
CTCF_GM12864_hg19_2	ENCODE Transcription Factor Binding Site Profiles	1	null
A-CA-04-2009(H1N1)_48Hour_23935999_GSE47962	GEO Signatures of Differentially Expressed Genes for Viral Infections	-1	-2.03803
H3K4me3_HL-60_hg19_1	ENCODE Histone Modification Site Profiles	1	null
positive regulation of cell differentiation	GO Biological Process Annotations 2015	1	null
H3K4me3_spleen_mm9_1	ENCODE Histone Modification Site Profiles	1	null
cSARS Bat SRBD_54Hour_None_GSE37827	GEO Signatures of Differentially Expressed Genes for Viral Infections	-1	-1.61644
cellular homeostasis	GO Biological Process Annotations 2015	1	null
cellular_component	COMPARTMENTS Curated Protein Localization Evidence Scores	1	0.098109
H3K4me3_foreskin fibroblast_hg19_2	ENCODE Histone Modification Site Profiles	1	null
Hepatomegaly	CTD Gene-Disease Associations	1	1.4449
A-Vietnam-1203_CIP048_RG3-2004(H5N1)mutPB1-F2del_3Hour_None_GSE43203	GEO Signatures of Differentially Expressed Genes for Viral Infections	-1	-1.73813
H3K4me3_fibroblast of pulmonary artery_hg19_2	ENCODE Histone Modification Site Profiles	1	null
NRF2-20460467-MEFS-MOUSE	ChEA Transcription Factor Targets 2022	1	null
abnormal bone structure	MGI Mouse Phenotype Associations 2023	1	null
H3K4me3_MEL cell line_mm9_3	ENCODE Histone Modification Site Profiles	1	null
CTCF_WI38_hg19_2	ENCODE Transcription Factor Binding Site Profiles	1	null
regulation of biological process	GO Biological Process Annotations 2015	1	null
Prelimbic area, layer 2	Allen Brain Atlas Adult Mouse Brain Tissue Gene Expression Profiles	1	1.133
hsa-miR-548d-3p	TargetScan Predicted Conserved microRNA Targets	1	0.303626
VZ in thalamic region	Allen Brain Atlas Prenatal Human Brain Tissue Gene Expression Profiles	1	1.59422
hsa-miR-181c	TargetScan Predicted Conserved microRNA Targets	1	0.568687
Sarcoma_SARC_TCGA-DX-A1KY-01A-11R-A24X-07	TCGA Signatures of Differentially Expressed Genes for Tumors	1	null
STAT6	MotifMap Predicted Transcription Factor Targets	1	null
GTEX-WFJO-0726-SM-4LVM8	GTEx Tissue Sample Gene Expression Profiles	1	1.07976
TCF12_ECC-1_hg19_1	ENCODE Transcription Factor Binding Site Profiles	1	null
VI, right, lateral hemisphere	Allen Brain Atlas Adult Human Brain Tissue Gene Expression Profiles	-1	-1.51986
C32TG	Klijn et al., Nat. Biotechnol., 2015 Cell Line Gene Expression Profiles	1	0.993903
CTCF_mammary epithelial cell_hg19_2	ENCODE Transcription Factor Binding Site Profiles	1	null
RMG-I	Klijn et al., Nat. Biotechnol., 2015 Cell Line Gene Expression Profiles	-1	-1.1465
Prelimbic area, layer 5	Allen Brain Atlas Adult Mouse Brain Tissue Gene Expression Profiles	1	1.02512
KURAMOCHI	COSMIC Cell Line Gene CNV Profiles	1	2.06989
GTEX-S4UY-0926-SM-4AD6O	GTEx Tissue Sample Gene Expression Profiles	1	0.829255
hsa-miR-181b	TargetScan Predicted Conserved microRNA Targets	1	0.632343
GTEX-NPJ7-0006-SM-3GACR	GTEx Tissue Sample Gene Expression Profiles	-1	-1.532
KYSE-70	Klijn et al., Nat. Biotechnol., 2015 Cell Line Gene CNV Profiles	-1	-0.882211
outer SZ in posterosuperior (dorsal) parietal cortex	Allen Brain Atlas Prenatal Human Brain Tissue Gene Expression Profiles	-1	-1.45729
H3K4me3_GM12865_hg19_1	ENCODE Histone Modification Site Profiles	1	null
GTEX-XOTO-3026-SM-4B65M	GTEx Tissue Sample Gene Expression Profiles	-1	-0.920885
Head and Neck squamous cell carcinoma_HNSC_TCGA-CN-A498-01A-11R-A24H-07	TCGA Signatures of Differentially Expressed Genes for Tumors	1	null
Cerebellar cortex	Allen Brain Atlas Adult Mouse Brain Tissue Gene Expression Profiles	1	1.14167
Lixivaptan	DeepCoverMOA Drug Mechanisms of Action	-1	-0.35
H3K4me3_HCT116_hg19_2	ENCODE Histone Modification Site Profiles	1	null
H3K27ac_liver_mm9_2	ENCODE Histone Modification Site Profiles	1	null
POLR2A_GM10847_hg19_1	ENCODE Transcription Factor Binding Site Profiles	1	null
SMC3_GM12878_hg19_1	ENCODE Transcription Factor Binding Site Profiles	1	null
GTEX-WFG8-1726-SM-4LVM6	GTEx Tissue Sample Gene Expression Profiles	1	0.858054
SOX2-19829295-ESCS-HUMAN	ChEA Transcription Factor Targets 2022	1	null
VIIB, right, paravermis	Allen Brain Atlas Adult Human Brain Tissue Gene Expression Profiles	-1	-1.07642
AR-19668381-PC3-HUMAN	ChEA Transcription Factor Targets 2022	1	null
cellular divalent inorganic cation homeostasis	GO Biological Process Annotations 2015	1	null
GTEX-WH7G-0008-SM-4LVNM	GTEx Tissue Sample Gene Expression Profiles	1	1.24557
GTEX-XMK1-0005-SM-4B665	GTEx Tissue Sample Gene Expression Profiles	-1	-1.32432
POLR2AphosphoS2_GM12878_hg19_1	ENCODE Transcription Factor Binding Site Profiles	1	null
H3K4me3_G1E-ER4_mm9_3	ENCODE Histone Modification Site Profiles	1	null
NRF1	ENCODE Transcription Factor Targets	1	null
GATA2	ChEA Transcription Factor Targets	1	null
GTEX-S3XE-0006-SM-3K2AA	GTEx Tissue Sample Gene Expression Profiles	-1	-1.33448
cellular phenotype	MPO Gene-Phenotype Associations	1	null
GIMEN	DepMap CRISPR Gene Dependency	1	4.93153
Nucleus prepositus	Allen Brain Atlas Adult Mouse Brain Tissue Gene Expression Profiles	-1	-1.16041
Infralimbic area, layer 6b	Allen Brain Atlas Adult Mouse Brain Tissue Gene Expression Profiles	1	1.09112
MAFK_HepG2_hg19_2	ENCODE Transcription Factor Binding Site Profiles	1	null
striatum_21 yrs_F_13057	Allen Brain Atlas Developing Human Brain Tissue Gene Expression Profiles by RNA-seq	1	1.62915
Atomoxetine	DeepCoverMOA Drug Mechanisms of Action	1	0.25
SMC3_K562_hg19_1	ENCODE Transcription Factor Binding Site Profiles	1	null
GTEX-W5WG-0008-SM-4KL25	GTEx Tissue Sample Gene Expression Profiles	1	1.76341
POLR2A_GM12878_hg19_2	ENCODE Transcription Factor Binding Site Profiles	1	null
CTCF_GM12868_hg19_1	ENCODE Transcription Factor Binding Site Profiles	1	null
rectum_8d	HPA Tissue Sample Gene Expression Profiles	-1	-0.861247
inferior olive, dorsal nucleus	Allen Brain Atlas Prenatal Human Brain Tissue Gene Expression Profiles	1	0.962212
NR2F2_K562_hg19_2	ENCODE Transcription Factor Binding Site Profiles	1	null
A 803467	DeepCoverMOA Drug Mechanisms of Action	-1	-0.25
rostral ventrolateral reticular area	Allen Brain Atlas Adult Mouse Brain Tissue Gene Expression Profiles	-1	-1.32426
JEKO1	CCLE Cell Line Gene CNV Profiles	-1	-1.76158
Cervical squamous cell carcinoma and endocervical adenocarcinoma_CESC_TCGA-FU-A3TX-01A-11R-A22U-07	TCGA Signatures of Differentially Expressed Genes for Tumors	1	null
MAVER1	DepMap CRISPR Gene Dependency	1	3.44555
H3K4me3_BJ_hg19_1	ENCODE Histone Modification Site Profiles	1	null
r7 part of nucleus prepositus	Allen Brain Atlas Adult Mouse Brain Tissue Gene Expression Profiles	-1	-1.39164
OPM1	CCLE Cell Line Gene CNV Profiles	-1	-1.45156
CTCF_GM12864_hg19_3	ENCODE Transcription Factor Binding Site Profiles	1	null
salivarygland_6b	HPA Tissue Sample Gene Expression Profiles	1	0.898053
Skin Cutaneous Melanoma_SKCM_TCGA-D3-A1Q9-06A-11R-A18T-07	TCGA Signatures of Differentially Expressed Genes for Tumors	1	null
Anterior cingulate area, ventral part, layer 1	Allen Brain Atlas Adult Mouse Brain Tissue Gene Expression Profiles	1	1.29196
superficial stratum of r4Ve	Allen Brain Atlas Adult Mouse Brain Tissue Gene Expression Profiles	-1	-1.01117
NCIH2029	CCLE Cell Line Gene Expression Profiles	-1	-1.93844
CTCF_MCF-7_hg19_8	ENCODE Transcription Factor Binding Site Profiles	1	null
GATA2-21666600-HMVEC-HUMAN	ChEA Transcription Factor Binding Site Profiles	1	null
MYC	ChEA Transcription Factor Targets	1	null
DOHH-2	Klijn et al., Nat. Biotechnol., 2015 Cell Line Gene Expression Profiles	1	1.2044
CREM-20920259-GC1-SPG-MOUSE	ChEA Transcription Factor Binding Site Profiles	1	null
POLR2AphosphoS5_GM12878_hg19_2	ENCODE Transcription Factor Binding Site Profiles	1	null
Breast Neoplasms	CTD Gene-Disease Associations	1	1.23265
Fumitremorgin C	DeepCoverMOA Drug Mechanisms of Action	-1	-0.41
GTEX-OIZF-0006-SM-2I5GQ	GTEx Tissue Sample Gene Expression Profiles	-1	-1.19061
oral mucosa	HPA Tissue Protein Expression Profiles	-1	-1.00606
inferolateral temporal cortex (area TEv, area 20)_12 pcw_F_12835	Allen Brain Atlas Developing Human Brain Tissue Gene Expression Profiles by RNA-seq	1	1.02644
GTEX-XV7Q-1226-SM-4BRVT	GTEx Tissue Sample Gene Expression Profiles	1	1.42345
central medullary reticular group, right	Allen Brain Atlas Adult Human Brain Tissue Gene Expression Profiles	1	1.26617
KM-12	Klijn et al., Nat. Biotechnol., 2015 Cell Line Gene CNV Profiles	1	0.949705
Lung adenocarcinoma_LUAD_TCGA-69-7974-01A-11R-2187-07	TCGA Signatures of Differentially Expressed Genes for Tumors	1	null
NELFE	ENCODE Transcription Factor Targets	1	null
hsa-miR-302e	TargetScan Predicted Conserved microRNA Targets	1	0.348832
m2 alar plate	Allen Brain Atlas Adult Mouse Brain Tissue Gene Expression Profiles	1	1.22591
Primary somatosensory area, trunk, layer 1	Allen Brain Atlas Adult Mouse Brain Tissue Gene Expression Profiles	-1	-1.89736
GTEX-X261-0011-R10B-SM-4E3JT	GTEx Tissue Sample Gene Expression Profiles	-1	-0.899892
POLR2A_H54_hg19_1	ENCODE Transcription Factor Binding Site Profiles	1	null
SARS-dORF6_24Hour_23935999_GSE47962	GEO Signatures of Differentially Expressed Genes for Viral Infections	-1	-1.75121
HCC1428	Klijn et al., Nat. Biotechnol., 2015 Cell Line Gene CNV Profiles	1	1.59738
SNU1076	CCLE Cell Line Gene Expression Profiles	-1	-2.10939
GTEX-XUZC-0126-SM-4BOO6	GTEx Tissue Sample Gene Expression Profiles	1	2.6967
TAF1_GM12878_hg19_2	ENCODE Transcription Factor Binding Site Profiles	1	null
MOLT4	CCLE Cell Line Gene Expression Profiles	-1	-1.52759
H3K4me3_GM06990_hg19_2	ENCODE Histone Modification Site Profiles	1	null
CTCF_K562_hg19_3	ENCODE Transcription Factor Binding Site Profiles	1	null
MAX_A549_hg19_2	ENCODE Transcription Factor Binding Site Profiles	1	null
hsa-miR-4694-3p	TargetScan Predicted Conserved microRNA Targets	1	0.078844
r7 portion of the hypoglossal motor nucleus	Allen Brain Atlas Adult Mouse Brain Tissue Gene Expression Profiles	-1	-1.10195
GTEX-S4P3-0008-SM-3NM8R	GTEx Tissue Sample Gene Expression Profiles	1	2.36352
GTEX-SIU7-1126-SM-2XCDW	GTEx Tissue Sample Gene Expression Profiles	1	1.50817
GTEX-WFJO-0426-SM-4LVM7	GTEx Tissue Sample Gene Expression Profiles	1	0.922484
icSARS CoV_30Hour_None_GSE37827	GEO Signatures of Differentially Expressed Genes for Viral Infections	-1	-1.87756
thyroid	GTEx Tissue Gene Expression Profiles	1	1.24449
Lung adenocarcinoma_LUAD_TCGA-73-4676-01A-01R-1755-07	TCGA Signatures of Differentially Expressed Genes for Tumors	1	null
VZ in hypothalamic portion	Allen Brain Atlas Prenatal Human Brain Tissue Gene Expression Profiles	1	1.11029
Brain - Cortex	GTEx Tissue Gene Expression Profiles 2023	1	1.70576
CTCF_kidney_hg19_1	ENCODE Transcription Factor Binding Site Profiles	1	null
GTEX-WFG7-1626-SM-4LVMF	GTEx Tissue Sample Gene Expression Profiles	1	1.73794
SNU-216	Klijn et al., Nat. Biotechnol., 2015 Cell Line Gene CNV Profiles	1	1.4671
r3 part of spinal trigeminal sensory column, oral part	Allen Brain Atlas Adult Mouse Brain Tissue Gene Expression Profiles	-1	-2.5447
abnormal skeleton morphology	MPO Gene-Phenotype Associations	1	null
Pancreatic adenocarcinoma_PAAD_TCGA-L1-A7W4-01A-12R-A36G-07	TCGA Signatures of Differentially Expressed Genes for Tumors	1	null
GABPA_K562_hg19_2	ENCODE Transcription Factor Binding Site Profiles	1	null
GTEX-X62O-0005-SM-46MV1	GTEx Tissue Sample Gene Expression Profiles	-1	-1.47355
Tacrine	DeepCoverMOA Drug Mechanisms of Action	-1	-0.49
PL21	CCLE Cell Line Gene Expression Profiles	-1	-1.5824
TP63_01_202	KnockTF Gene Expression Profiles with Transcription Factor Perturbations	-1	-0.59535
anterior (rostral) cingulate (medial prefrontal) cortex_21 yrs_F_13057	Allen Brain Atlas Developing Human Brain Tissue Gene Expression Profiles by RNA-seq	1	0.832186
CTCF_endothelial cell of umbilical vein_hg19_3	ENCODE Transcription Factor Binding Site Profiles	1	null
GTEX-U3ZH-0008-SM-4DXT2	GTEx Tissue Sample Gene Expression Profiles	1	0.830052
NCI-H1435	Klijn et al., Nat. Biotechnol., 2015 Cell Line Gene Mutation Profiles	1	null
hippocampus (hippocampal formation)_9 pcw_M_12833	Allen Brain Atlas Developing Human Brain Tissue Gene Expression Profiles by RNA-seq	1	0.994045
Head and Neck squamous cell carcinoma_HNSC_TCGA-CV-6948-01A-11R-1915-07	TCGA Signatures of Differentially Expressed Genes for Tumors	1	null
Folium-tuber vermis (VII), granular layer	Allen Brain Atlas Adult Mouse Brain Tissue Gene Expression Profiles	1	1.58076
POLR2A_MCF-7_hg19_3	ENCODE Transcription Factor Binding Site Profiles	1	null
GTEX-Q2AI-0006-SM-2I3FG	GTEx Tissue Sample Gene Expression Profiles	-1	-1.00059
hsa-miR-516b	TargetScan Predicted Conserved microRNA Targets	1	0.205675
POLR2AphosphoS5_Panc1_hg19_1	ENCODE Transcription Factor Binding Site Profiles	1	null
ChIP_SOX17_20123909	ESCAPE Omics Signatures of Genes and Proteins for Stem Cells	1	null
GTEX-VJWN-0005-SM-3GIKF	GTEx Tissue Sample Gene Expression Profiles	-1	-1.80942
hsa-miR-372	TargetScan Predicted Conserved microRNA Targets	1	0.37496
Culmen	Allen Brain Atlas Adult Mouse Brain Tissue Gene Expression Profiles	1	1.84942
H3K4me3_Caco-2_hg19_2	ENCODE Histone Modification Site Profiles	1	null
primary motor cortex (area M1, area 4)_11 yrs_F_12289	Allen Brain Atlas Developing Human Brain Tissue Gene Expression Profiles by RNA-seq	1	1.18237
hsa-miR-656	TargetScan Predicted Nonconserved microRNA Targets	1	0.965816
CTCF_fibroblast of upper leg skin_hg19_1	ENCODE Transcription Factor Binding Site Profiles	1	null
hsa-miR-2052	TargetScan Predicted Conserved microRNA Targets	1	0.111118
regulation of multicellular organismal process	GO Biological Process Annotations 2015	1	null
Cervical squamous cell carcinoma and endocervical adenocarcinoma_CESC_TCGA-JX-A3Q8-01A-11R-A21T-07	TCGA Signatures of Differentially Expressed Genes for Tumors	1	null
CHD2_HeLa-S3_hg19_1	ENCODE Transcription Factor Binding Site Profiles	1	null
JHH-7	Klijn et al., Nat. Biotechnol., 2015 Cell Line Gene CNV Profiles	-1	-1.14836
H2AFZ_fibroblast of lung_hg19_1	ENCODE Transcription Factor Binding Site Profiles	1	null
NTERA-2	Klijn et al., Nat. Biotechnol., 2015 Cell Line Gene Expression Profiles	-1	-1.31852
posterior (caudal) superior temporal cortex (area 22c)_17 pcw_F_12880	Allen Brain Atlas Developing Human Brain Tissue Gene Expression Profiles by RNA-seq	-1	-1.75826
H3K4me3_kidney epithelial cell_hg19_2	ENCODE Histone Modification Site Profiles	1	null
Sarcoma_SARC_TCGA-HS-A5N7-01A-21R-A26T-07	TCGA Signatures of Differentially Expressed Genes for Tumors	1	null
CEBPB_H1-hESC_hg19_1	ENCODE Transcription Factor Binding Site Profiles	1	null
BFTC-909	Klijn et al., Nat. Biotechnol., 2015 Cell Line Gene Mutation Profiles	1	null
CDAN1_02_197	KnockTF Gene Expression Profiles with Transcription Factor Perturbations	-1	-0.60881
multiform (lateral) division of MD	Allen Brain Atlas Prenatal Human Brain Tissue Gene Expression Profiles	1	0.980724
medial amygdala, anterodorsal part	Allen Brain Atlas Adult Mouse Brain Tissue Gene Expression Profiles	1	1.08625
SARS-CoV MA15_Day2-C57BL6_None_GSE50878	GEO Signatures of Differentially Expressed Genes for Viral Infections	-1	-1.26457
striatum_13 pcw_F_12834	Allen Brain Atlas Developing Human Brain Tissue Gene Expression Profiles by RNA-seq	-1	-0.895185
POLR2AphosphoS5_G1E_mm9_1	ENCODE Transcription Factor Binding Site Profiles	1	null
H2BK5ac_H9	Roadmap Epigenomics Histone Modification Site Profiles	1	null
POLR2AphosphoS2_CH12.LX_mm9_1	ENCODE Transcription Factor Binding Site Profiles	1	null
GTEX-WY7C-0006-SM-3NB3L	GTEx Tissue Sample Gene Expression Profiles	-1	-1.44984
RAD21_HeLa-S3_hg19_1	ENCODE Transcription Factor Binding Site Profiles	1	null
CEBPB_HepG2_hg19_3	ENCODE Transcription Factor Binding Site Profiles	1	null
H3K4me3_H1 BMP4 Derived Trophoblast Cultured Cells	Roadmap Epigenomics Histone Modification Site Profiles	1	null
GTEX-POMQ-0006-SM-33HBY	GTEx Tissue Sample Gene Expression Profiles	-1	-1.33864
skeletal system	TISSUES Text-mining Tissue Protein Expression Evidence Scores	1	0.063499
Streptococcal tonsillitis_Tonsillar Lymphoid Tissue_GSE11494	GEO Signatures of Differentially Expressed Genes for Diseases	-1	-1.86912
H3K9ac_astrocyte_hg19_1	ENCODE Histone Modification Site Profiles	1	null
CEBPB_IMR-90_hg19_1	ENCODE Transcription Factor Binding Site Profiles	1	null
nucleus of the inferior collicular brachium, caudal part	Allen Brain Atlas Adult Mouse Brain Tissue Gene Expression Profiles	1	3.16983
NRF1_K562_hg19_1	ENCODE Transcription Factor Binding Site Profiles	1	null
Lung squamous cell carcinoma_LUSC_TCGA-85-8352-01A-31R-2326-07	TCGA Signatures of Differentially Expressed Genes for Tumors	1	null
H3K4me3_K562_hg19_3	ENCODE Histone Modification Site Profiles	1	null
ursodeoxycholic acid_mus musculus_gpl6246_gse22608	GEO Signatures of Differentially Expressed Genes for Small Molecules	1	null
GTEX-QVJO-1325-SM-2S1QX	GTEx Tissue Sample Gene Expression Profiles	-1	-1.04355
GTEX-Q2AI-0226-SM-48U1D	GTEx Tissue Sample Gene Expression Profiles	1	1.08813
Rectum adenocarcinoma_READ_TCGA-AG-3591-01A-01R-1736-07	TCGA Signatures of Differentially Expressed Genes for Tumors	1	null
USF2_H1-hESC_hg19_1	ENCODE Transcription Factor Binding Site Profiles	1	null
outer SZ in midlateral extrastriate cortex	Allen Brain Atlas Prenatal Human Brain Tissue Gene Expression Profiles	-1	-1.06279
ZR-75-1	Klijn et al., Nat. Biotechnol., 2015 Cell Line Gene Expression Profiles	1	0.947819
JUND	ENCODE Transcription Factor Targets	1	null
hsa-miR-320d	TargetScan Predicted Conserved microRNA Targets	1	0.419947
HDAC2_K562_hg19_1	ENCODE Transcription Factor Binding Site Profiles	1	null
Benzbromarone	DeepCoverMOA Drug Mechanisms of Action	1	0.61
CTCF_MEL cell line_mm9_5	ENCODE Transcription Factor Binding Site Profiles	1	null
CTCF_GM12875_hg19_2	ENCODE Transcription Factor Binding Site Profiles	1	null
GTEX-QV31-0726-SM-3GAEG	GTEx Tissue Sample Gene Expression Profiles	1	1.76867
cytoplasm	COMPARTMENTS Curated Protein Localization Evidence Scores	1	0.03318
COLO 206F	Klijn et al., Nat. Biotechnol., 2015 Cell Line Gene Expression Profiles	-1	-1.2265
VZ in ventrolateral prefrontal cortex	Allen Brain Atlas Prenatal Human Brain Tissue Gene Expression Profiles	-1	-0.905567
19837975-TableS1	GeneSigDB Published Gene Signatures	1	null
Infralimbic area, layer 2/3	Allen Brain Atlas Adult Mouse Brain Tissue Gene Expression Profiles	1	1.00712
GTEX-S7PM-0011-R6A-SM-3NM8F	GTEx Tissue Sample Gene Expression Profiles	-1	-1.07437
GTEX-R55G-1626-SM-48FF4	GTEx Tissue Sample Gene Expression Profiles	1	1.27817
GTEX-T6MN-0005-SM-32PLJ	GTEx Tissue Sample Gene Expression Profiles	-1	-2.15308
GTEX-XPT6-0126-SM-4B65S	GTEx Tissue Sample Gene Expression Profiles	-1	-0.890096
cerebellar cortex_21 pcw_F_12365	Allen Brain Atlas Developing Human Brain Tissue Gene Expression Profiles by RNA-seq	-1	-1.48043
NCI-H510A	Klijn et al., Nat. Biotechnol., 2015 Cell Line Gene CNV Profiles	1	2.56226
hsa-miR-3166	TargetScan Predicted Conserved microRNA Targets	1	0.265648
SUM 1315M02	Klijn et al., Nat. Biotechnol., 2015 Cell Line Gene CNV Profiles	-1	-0.853165
skeletal muscle	HPA Tissue Gene Expression Profiles	-1	-1.18236
fMLF	DeepCoverMOA Drug Mechanisms of Action	1	0.41
Brain Lower Grade Glioma_LGG_TCGA-CS-6665-01A-11R-1896-07	TCGA Signatures of Differentially Expressed Genes for Tumors	1	null
cuneiform nucleus	Allen Brain Atlas Adult Mouse Brain Tissue Gene Expression Profiles	1	1.16387
Necrosis	CTD Gene-Disease Associations	1	1.81262
ARID3A_HepG2_hg19_1	ENCODE Transcription Factor Binding Site Profiles	1	null
TAF1_HepG2_hg19_2	ENCODE Transcription Factor Binding Site Profiles	1	null
Desvenlafaxine	DeepCoverMOA Drug Mechanisms of Action	-1	-0.38
GTEX-UPJH-0006-SM-3GACW	GTEx Tissue Sample Gene Expression Profiles	-1	-0.8863
IX, right, paravermis	Allen Brain Atlas Adult Human Brain Tissue Gene Expression Profiles	-1	-2.08579
ovary_8a	HPA Tissue Sample Gene Expression Profiles	1	0.861121
17910759-TableS5	GeneSigDB Published Gene Signatures	1	null
hsa-miR-2355-5p	TargetScan Predicted Nonconserved microRNA Targets	1	0.880544
GTEX-O5YT-0726-SM-3MJHA	GTEx Tissue Sample Gene Expression Profiles	1	0.998914
ovary	HPA Tissue Protein Expression Profiles	-1	-1.00606
positive regulation of biological process	GO Biological Process Annotations 2015	1	null
SMC3_CH12.LX_mm9_1	ENCODE Transcription Factor Binding Site Profiles	1	null
H3K9ac_mammary epithelial cell_hg19_1	ENCODE Histone Modification Site Profiles	1	null
decitabine_homo sapiens_gpl570_gse30985	GEO Signatures of Differentially Expressed Genes for Small Molecules	1	null
GTEX-U3ZN-0008-SM-4DXTL	GTEx Tissue Sample Gene Expression Profiles	1	0.899357
whole body	TISSUES Text-mining Tissue Protein Expression Evidence Scores	1	0.050893
GATA1-22383799-G1ME-MOUSE	ChEA Transcription Factor Targets 2022	1	null
YY1	JASPAR Predicted Transcription Factor Targets	1	null
POLR2AphosphoS2_HeLa-S3_hg19_1	ENCODE Transcription Factor Binding Site Profiles	1	null
endometrium_5a	HPA Tissue Sample Gene Expression Profiles	1	1.04522
MM.1S	Klijn et al., Nat. Biotechnol., 2015 Cell Line Gene CNV Profiles	-1	-1.72704
GTEX-XLM4-2926-SM-4AT59	GTEx Tissue Sample Gene Expression Profiles	-1	-1.03873
CTCFL_K562_hg19_1	ENCODE Transcription Factor Binding Site Profiles	1	null
MAX_H1-hESC_hg19_2	ENCODE Transcription Factor Binding Site Profiles	1	null
MYC_GM12878_hg19_1	ENCODE Transcription Factor Binding Site Profiles	1	null
ZNF384_K562_hg19_1	ENCODE Transcription Factor Binding Site Profiles	1	null
hsa-miR-4685-3p	TargetScan Predicted Conserved microRNA Targets	1	0.997906
Head and Neck squamous cell carcinoma_HNSC_TCGA-CV-7409-01A-31R-2232-07	TCGA Signatures of Differentially Expressed Genes for Tumors	1	null
SK-MM-2	Klijn et al., Nat. Biotechnol., 2015 Cell Line Gene CNV Profiles	1	1.95048
CX-1	Klijn et al., Nat. Biotechnol., 2015 Cell Line Gene Expression Profiles	-1	-0.992172
intermediate stratum of r3Tr	Allen Brain Atlas Adult Mouse Brain Tissue Gene Expression Profiles	-1	-1.46274
estradiol_homo sapiens_gpl6947_gse27375	GEO Signatures of Differentially Expressed Genes for Small Molecules	1	null
GTEX-QLQ7-0005-SM-2S1QP	GTEx Tissue Sample Gene Expression Profiles	-1	-0.844315
hsa-miR-4503	TargetScan Predicted Conserved microRNA Targets	1	0.107229
nucleus coeruleus	Allen Brain Atlas Prenatal Human Brain Tissue Gene Expression Profiles	1	0.930283
CTCF_GM12870_hg19_1	ENCODE Transcription Factor Binding Site Profiles	1	null
ZBTB7A_HepG2_hg19_1	ENCODE Transcription Factor Binding Site Profiles	1	null
BT-483	Klijn et al., Nat. Biotechnol., 2015 Cell Line Gene Expression Profiles	1	2.24729
mantle zone of r4Tr	Allen Brain Atlas Adult Mouse Brain Tissue Gene Expression Profiles	-1	-1.09562
ZEB1_GM12878_hg19_2	ENCODE Transcription Factor Binding Site Profiles	1	null
hsa-miR-4755-5p	TargetScan Predicted Conserved microRNA Targets	1	0.598666
hsa-miR-320a	TargetScan Predicted Conserved microRNA Targets	1	0.419947
PRDM14-21183938-MESCS-MOUSE	ChEA Transcription Factor Targets 2022	1	null
H2AFZ_CD14-positive monocyte_hg19_1	ENCODE Transcription Factor Binding Site Profiles	1	null
MYC_K562_hg19_1	ENCODE Transcription Factor Binding Site Profiles	1	null
hsa-miR-1322	TargetScan Predicted Nonconserved microRNA Targets	1	0.921135
H3K4me1_endothelial cell of umbilical vein_hg19_1	ENCODE Histone Modification Site Profiles	1	null
H3K4me1_CH12.LX_mm9_4	ENCODE Histone Modification Site Profiles	1	null
SUPB15	CCLE Cell Line Gene Expression Profiles	-1	-1.45148
GTEX-UJMC-0005-SM-3GACU	GTEx Tissue Sample Gene Expression Profiles	-1	-1.49946
hsa-miR-3908	TargetScan Predicted Nonconserved microRNA Targets	1	0.965816
Microcephaly	CTD Gene-Disease Associations	1	1.10424
TAF1_GM12878_hg19_1	ENCODE Transcription Factor Binding Site Profiles	1	null
SARS-CoV_60Hour_23935999_GSE47962	GEO Signatures of Differentially Expressed Genes for Viral Infections	-1	-1.83077
GATA3-24758297-MCF-7-HUMAN	ChEA Transcription Factor Targets 2022	1	null
GTEX-VUSH-0005-SM-3NB2H	GTEx Tissue Sample Gene Expression Profiles	-1	-1.19427
RPMI2650	DepMap CRISPR Gene Dependency	1	2.96115
TBP_MEL cell line_mm9_1	ENCODE Transcription Factor Binding Site Profiles	1	null
RAD21_HepG2_hg19_1	ENCODE Transcription Factor Binding Site Profiles	1	null
negative regulation of Wnt signaling pathway	GO Biological Process Annotations 2025	1	null
Lung adenocarcinoma_LUAD_TCGA-80-5607-01A-31R-1949-07	TCGA Signatures of Differentially Expressed Genes for Tumors	1	null
GTEX-PSDG-0426-SM-2S1OF	GTEx Tissue Sample Gene Expression Profiles	-1	-0.984383
Stevens-Johnson Syndrome	CTD Gene-Disease Associations	1	1.08372
mRNA_ESRRB_19136965	ESCAPE Omics Signatures of Genes and Proteins for Stem Cells	1	null
EVSA-T	Klijn et al., Nat. Biotechnol., 2015 Cell Line Gene Expression Profiles	-1	-0.994279
integument	TISSUES Experimental Tissue Protein Expression Evidence Scores	1	1.0758
H2AFZ_B cell_hg19_1	ENCODE Transcription Factor Binding Site Profiles	1	null
Lung squamous cell carcinoma_LUSC_TCGA-18-3409-01A-01R-0980-07	TCGA Signatures of Differentially Expressed Genes for Tumors	1	null
HCC1599	CCLE Cell Line Gene Expression Profiles	1	1.5086
outer SZ in posteror frontal cortex (motor cortex)	Allen Brain Atlas Prenatal Human Brain Tissue Gene Expression Profiles	-1	-1.32138
EFM-192C	Klijn et al., Nat. Biotechnol., 2015 Cell Line Gene CNV Profiles	1	2.245
SP in caudal perirhinal cortex	Allen Brain Atlas Prenatal Human Brain Tissue Gene Expression Profiles	1	1.01367
CTCF_keratinocyte_hg19_2	ENCODE Transcription Factor Binding Site Profiles	1	null
cation homeostasis	GO Biological Process Annotations 2015	1	null
Brain Lower Grade Glioma_LGG_TCGA-HT-7469-01A-11R-2256-07	TCGA Signatures of Differentially Expressed Genes for Tumors	1	null
ATF1_K562_hg19_1	ENCODE Transcription Factor Binding Site Profiles	1	null
Acute Myeloid Leukemia_LAML_TCGA-AB-2913-03A-01T-0734-13	TCGA Signatures of Differentially Expressed Genes for Tumors	1	null
NCIH660	CCLE Cell Line Gene CNV Profiles	1	1.53882
regulation of canonical Wnt signaling pathway	GO Biological Process Annotations 2025	1	null
nucleus of the diagonal band, left, horizontal division	Allen Brain Atlas Adult Human Brain Tissue Gene Expression Profiles	1	1.3083
cervix uteri	GTEx Tissue Gene Expression Profiles	1	0.839178
ChIP_TCF3_18467660	ESCAPE Omics Signatures of Genes and Proteins for Stem Cells	1	null
GTEX-PWN1-0726-SM-48TDR	GTEx Tissue Sample Gene Expression Profiles	1	0.855581
mRNA_SETDB1_19884255	ESCAPE Omics Signatures of Genes and Proteins for Stem Cells	1	null
cSARS Bat SRBD_12Hour_None_GSE37827	GEO Signatures of Differentially Expressed Genes for Viral Infections	-1	-1.78235
PML	ENCODE Transcription Factor Targets	1	null
POLR2AphosphoS5_H1-hESC_hg19_1	ENCODE Transcription Factor Binding Site Profiles	1	null
icSARS CoV_48Hour_None_GSE37827	GEO Signatures of Differentially Expressed Genes for Viral Infections	-1	-1.57514
MZ in dorsomedial frontal cortex	Allen Brain Atlas Prenatal Human Brain Tissue Gene Expression Profiles	1	0.863019
GTEX-XPT6-0006-SM-4B66Q	GTEx Tissue Sample Gene Expression Profiles	-1	-1.32571
regulation of fat cell differentiation	GO Biological Process Annotations 2025	1	null
intrinsic component of membrane	GO Cellular Component Annotations 2015	1	null
GTEX-T5JW-1226-SM-3GACY	GTEx Tissue Sample Gene Expression Profiles	1	2.52762
RPE1SS77	DepMap CRISPR Gene Dependency	1	3.83138
cervix, uterine	HPA Tissue Protein Expression Profiles	-1	-1.00606
hsa-miR-3161	TargetScan Predicted Conserved microRNA Targets	1	0.059817
GP5D	COSMIC Cell Line Gene Mutation Profiles	1	null
H3K4me1_small intestine_mm9_1	ENCODE Histone Modification Site Profiles	1	null
r1 part of lateral pontine nuclei	Allen Brain Atlas Adult Mouse Brain Tissue Gene Expression Profiles	1	2.29215
Ebolavirus(ZEBOV)_5day_Spleen_None_GSE57214	GEO Signatures of Differentially Expressed Genes for Viral Infections	1	2.25099
A-Vietnam-1203_CIP048_RG4-2004(H5N1)NS1trunc124_1day-MOI-10^3_None_GSE44445	GEO Signatures of Differentially Expressed Genes for Viral Infections	-1	-2.1193
GTEX-S95S-0008-SM-4AT5M	GTEx Tissue Sample Gene Expression Profiles	1	2.37174
E2F1-18555785-MESC-mouse	ChEA Transcription Factor Binding Site Profiles	1	null
TAL1-30185409-K562-MOUSE-BONEMARROW-LEUKEMIA	ChEA Transcription Factor Targets 2022	1	null
GATA1_erythroblast_hg19_2	ENCODE Transcription Factor Binding Site Profiles	1	null
LYL1-30185409-K562-MOUSE-BONEMARROW-LEUKEMIA	ChEA Transcription Factor Targets 2022	1	null
H3K36me3_MEL cell line_mm9_2	ENCODE Transcription Factor Binding Site Profiles	1	null
Carprofen	DeepCoverMOA Drug Mechanisms of Action	1	0.23
SUM 52PE	Klijn et al., Nat. Biotechnol., 2015 Cell Line Gene Expression Profiles	-1	-1.58907
FOXO3-22982991-MACROPHAGES-MOUSE	ChEA Transcription Factor Binding Site Profiles	1	null
Blood Coagulation Disorders	CTD Gene-Disease Associations	1	1.08975
Head and Neck squamous cell carcinoma_HNSC_TCGA-MZ-A7D7-01A-21R-A34R-07	TCGA Signatures of Differentially Expressed Genes for Tumors	1	null
RCOR1_HepG2_hg19_1	ENCODE Transcription Factor Binding Site Profiles	1	null
H3K4me3_endothelial cell of umbilical vein_hg19_2	ENCODE Histone Modification Site Profiles	1	null
EZH2_fibroblast of dermis_hg19_1	ENCODE Transcription Factor Binding Site Profiles	1	null
GTEX-SSA3-0005-SM-32QOT	GTEx Tissue Sample Gene Expression Profiles	-1	-1.03896
H3K27me3_fibroblast of dermis_hg19_1	ENCODE Transcription Factor Binding Site Profiles	1	null
positive regulation of bone resorption	GO Biological Process Annotations 2023	1	null
KAT2A_CH12.LX_mm9_1	ENCODE Transcription Factor Binding Site Profiles	1	null
GTEX-XQ8I-0006-SM-4BOQ5	GTEx Tissue Sample Gene Expression Profiles	-1	-2.40919
GTEX-OIZH-0005-SM-2HMJN	GTEx Tissue Sample Gene Expression Profiles	-1	-1.29941
outer SZ in lateral temporal-occipital cortex	Allen Brain Atlas Prenatal Human Brain Tissue Gene Expression Profiles	-1	-0.869931
E2F6_A549_hg19_1	ENCODE Transcription Factor Binding Site Profiles	1	null
posteroventral (inferior) parietal cortex_11 yrs_F_12289	Allen Brain Atlas Developing Human Brain Tissue Gene Expression Profiles by RNA-seq	1	1.32113
Nerve Degeneration	CTD Gene-Disease Associations	1	1.45009
GTEX-RVPU-0005-SM-2TF6L	GTEx Tissue Sample Gene Expression Profiles	-1	-2.34845
GTEX-S3XE-1326-SM-4AD4H	GTEx Tissue Sample Gene Expression Profiles	1	1.01332
Depressive Disorder	CTD Gene-Disease Associations	1	1.03604
H3K4me3_fibroblast of lung_hg19_5	ENCODE Histone Modification Site Profiles	1	null
ChIP_SETDB1_19884255	ESCAPE Omics Signatures of Genes and Proteins for Stem Cells	1	null
abnormal leukocyte cell number	MPO Gene-Phenotype Associations	1	null
cdx2_21074721_jejunum_epithelium_lof_mouse_gpl10773_gse23436	GEO Signatures of Differentially Expressed Genes for Transcription Factor Perturbations	-1	-0.011844
CTCF_mammary epithelial cell_hg19_3	ENCODE Transcription Factor Binding Site Profiles	1	null
CTCF_GM12864_hg19_1	ENCODE Transcription Factor Binding Site Profiles	1	null
POLR2AphosphoS5_Panc1_hg19_2	ENCODE Transcription Factor Binding Site Profiles	1	null
whole body	TISSUES Experimental Tissue Protein Expression Evidence Scores	1	0.23362
GTEX-XOTO-0011-R11B-SM-4B64O	GTEx Tissue Sample Gene Expression Profiles	-1	-0.92834
Weight Gain	CTD Gene-Disease Associations	1	1.1485
superficial stratum of cerebellar vermis	Allen Brain Atlas Adult Mouse Brain Tissue Gene Expression Profiles	1	1.44634
dexamethasone_homo sapiens_gpl4133_gse42619	GEO Signatures of Differentially Expressed Genes for Small Molecules	1	null
hsa-miR-340	TargetScan Predicted Conserved microRNA Targets	1	0.15008
EGR1	ENCODE Transcription Factor Targets	1	null
SW 780	Klijn et al., Nat. Biotechnol., 2015 Cell Line Gene Expression Profiles	1	0.836064
Head and Neck squamous cell carcinoma_HNSC_TCGA-CQ-A4C6-01A-11R-A24Z-07	TCGA Signatures of Differentially Expressed Genes for Tumors	1	null
Simple lobule, granular layer	Allen Brain Atlas Adult Mouse Brain Tissue Gene Expression Profiles	1	1.54479
H3K4me3_B cell_hg19_1	ENCODE Histone Modification Site Profiles	1	null
Lung squamous cell carcinoma_LUSC_TCGA-33-4533-01A-01R-1201-07	TCGA Signatures of Differentially Expressed Genes for Tumors	1	null
Prostate adenocarcinoma_PRAD_TCGA-YL-A8S8-01A-11R-A37L-07	TCGA Signatures of Differentially Expressed Genes for Tumors	1	null
A3/KAW	Klijn et al., Nat. Biotechnol., 2015 Cell Line Gene CNV Profiles	-1	-1.84331
Lung squamous cell carcinoma_LUSC_TCGA-56-6546-01A-11R-1820-07	TCGA Signatures of Differentially Expressed Genes for Tumors	1	null
cellular_component	LOCATE Predicted Protein Localization Annotations	1	null
CGS 35066	DeepCoverMOA Drug Mechanisms of Action	1	0.27
CTCF_SK-N-SH_hg19_1	ENCODE Transcription Factor Binding Site Profiles	1	null
Kidney renal papillary cell carcinoma_KIRP_TCGA-B9-A5W9-01A-11R-A28H-07	TCGA Signatures of Differentially Expressed Genes for Tumors	1	null
NFIC_GM12878_hg19_1	ENCODE Transcription Factor Binding Site Profiles	1	null
CTCF_GM12878_hg19_2	ENCODE Transcription Factor Binding Site Profiles	1	null
GTEX-Q2AH-0005-SM-33HBR	GTEx Tissue Sample Gene Expression Profiles	-1	-1.48932
H3K4me3_K562_hg19_4	ENCODE Histone Modification Site Profiles	1	null
E2F6_K562_hg19_2	ENCODE Transcription Factor Binding Site Profiles	1	null
SG in primary somatosensory cortex	Allen Brain Atlas Prenatal Human Brain Tissue Gene Expression Profiles	1	1.38899
proteasome accessory complex	COMPARTMENTS Text-mining Protein Localization Evidence Scores	1	0.246046
GTEX-QEG5-0006-SM-2I5FZ	GTEx Tissue Sample Gene Expression Profiles	-1	-1.60936
H3K9ac_fibroblast of lung_hg19_1	ENCODE Histone Modification Site Profiles	1	null
GTEX-VJYA-0005-SM-3P5ZD	GTEx Tissue Sample Gene Expression Profiles	-1	-2.06033
CTCF_choroid plexus epithelial cell_hg19_1	ENCODE Transcription Factor Binding Site Profiles	1	null
STAT5A_GM12878_hg19_1	ENCODE Transcription Factor Binding Site Profiles	1	null
SK-MEL-28	Klijn et al., Nat. Biotechnol., 2015 Cell Line Gene Expression Profiles	1	1.13539
POLR2AphosphoS5_PFSK-1_hg19_2	ENCODE Transcription Factor Binding Site Profiles	1	null
SETDB1_K562_hg19_1	ENCODE Transcription Factor Binding Site Profiles	1	null
POLR2A_ECC-1_hg19_2	ENCODE Transcription Factor Binding Site Profiles	1	null
H3K4me1_iPS DF 6.9	Roadmap Epigenomics Histone Modification Site Profiles	1	null
19621087-Table1a	GeneSigDB Published Gene Signatures	1	null
H3K4me1_megakaryocyte_mm9_2	ENCODE Histone Modification Site Profiles	1	null
hsa-miR-583	TargetScan Predicted Conserved microRNA Targets	1	1.11641
GTEX-S4Q7-0226-SM-4AD5O	GTEx Tissue Sample Gene Expression Profiles	1	1.06955
H3K9ac_heart_mm9_1	ENCODE Histone Modification Site Profiles	1	null
GTEX-S4Q7-0008-SM-3NM8A	GTEx Tissue Sample Gene Expression Profiles	1	3.73979
GTEX-S341-0006-SM-3NM8D	GTEx Tissue Sample Gene Expression Profiles	-1	-2.21225
MERCK544	DeepCoverMOA Drug Mechanisms of Action	1	0.36
Anterior cingulate area, ventral part, layer 2/3	Allen Brain Atlas Adult Mouse Brain Tissue Gene Expression Profiles	1	1.13705
HCC2935	Klijn et al., Nat. Biotechnol., 2015 Cell Line Gene Expression Profiles	-1	-1.06804
RKO	Klijn et al., Nat. Biotechnol., 2015 Cell Line Gene CNV Profiles	1	1.63873
ZBTB7A	ENCODE Transcription Factor Targets	1	null
Acute Kidney Injury	CTD Gene-Disease Associations	1	1.3443
GATA1_MEL cell line_mm9_1	ENCODE Transcription Factor Binding Site Profiles	1	null
CTCF_testis_mm9_1	ENCODE Transcription Factor Binding Site Profiles	1	null
GTEX-X5EB-2226-SM-46MW4	GTEx Tissue Sample Gene Expression Profiles	1	1.01407
GTEX-U4B1-0008-SM-4DXUW	GTEx Tissue Sample Gene Expression Profiles	1	1.21044
GTEX-XBEC-1326-SM-4AT69	GTEx Tissue Sample Gene Expression Profiles	-1	-1.06988
H3K4me3_C2C12_mm9_1	ENCODE Histone Modification Site Profiles	1	null
Lateral reticular nucleus, parvicellular part	Allen Brain Atlas Adult Mouse Brain Tissue Gene Expression Profiles	-1	-4.10704
Kidney renal papillary cell carcinoma_KIRP_TCGA-G7-6789-01A-11R-1965-07	TCGA Signatures of Differentially Expressed Genes for Tumors	1	null
SETDB1-19884257-MESCS-MOUSE	ChEA Transcription Factor Targets 2022	1	null
regulation of osteoclast differentiation	GO Biological Process Annotations 2025	1	null
temporotympanic muscle trigeminal motor cell group	Allen Brain Atlas Adult Mouse Brain Tissue Gene Expression Profiles	-1	-1.73264
POLR2A_spleen_mm9_1	ENCODE Transcription Factor Binding Site Profiles	1	null
GTEX-WRHK-0005-SM-3MJF5	GTEx Tissue Sample Gene Expression Profiles	-1	-0.967495
Lung adenocarcinoma_LUAD_TCGA-55-A4DF-01A-11R-A24H-07	TCGA Signatures of Differentially Expressed Genes for Tumors	1	null
PPARG	ChEA Transcription Factor Targets	1	null
A4-FUK	COSMIC Cell Line Gene Mutation Profiles	1	null
GTEX-RU1J-0426-SM-46MUK	GTEx Tissue Sample Gene Expression Profiles	1	1.47141
Cervical squamous cell carcinoma and endocervical adenocarcinoma_CESC_TCGA-HM-A6W2-01A-21R-A33Z-07	TCGA Signatures of Differentially Expressed Genes for Tumors	1	null
SIN3A_GM12878_hg19_1	ENCODE Transcription Factor Binding Site Profiles	1	null
hippocampus (hippocampal formation)_8 yrs_M_12981	Allen Brain Atlas Developing Human Brain Tissue Gene Expression Profiles by RNA-seq	1	0.870355
A-Netherlands-602-2009(H1N1)_48Hour_None_GSE40844	GEO Signatures of Differentially Expressed Genes for Viral Infections	1	2.41066
GTEX-S4Z8-0126-SM-4GICC	GTEx Tissue Sample Gene Expression Profiles	1	1.17146
hsa-miR-548an	TargetScan Predicted Conserved microRNA Targets	1	0.059817
H3K4me3_WI38_hg19_1	ENCODE Histone Modification Site Profiles	1	null
Fluconazole	DeepCoverMOA Drug Mechanisms of Action	1	0.55
regulation of molecular function	GO Biological Process Annotations 2015	1	null
Bladder Urothelial Carcinoma_BLCA_TCGA-CU-A0YR-01A-12R-A10U-07	TCGA Signatures of Differentially Expressed Genes for Tumors	1	null
RAD21_HepG2_hg19_2	ENCODE Transcription Factor Binding Site Profiles	1	null
Bladder Urothelial Carcinoma_BLCA_TCGA-YC-A89H-01A-11R-A36F-07	TCGA Signatures of Differentially Expressed Genes for Tumors	1	null
REST_K562_hg19_3	ENCODE Transcription Factor Binding Site Profiles	1	null
H3K4me3_erythroblast_mm9_2	ENCODE Histone Modification Site Profiles	1	null
CEBPD_01_74	KnockTF Gene Expression Profiles with Transcription Factor Perturbations	1	1.02116
hsa-miR-3922-5p	TargetScan Predicted Conserved microRNA Targets	1	0.248923
GTEX-U3ZM-0126-SM-3DB8M	GTEx Tissue Sample Gene Expression Profiles	1	2.12334
hsa-miR-548x	TargetScan Predicted Conserved microRNA Targets	1	1.11641
Sarcoma_SARC_TCGA-X6-A7WB-01A-11R-A355-07	TCGA Signatures of Differentially Expressed Genes for Tumors	1	null
GTEX-OHPM-0006-SM-2HMKU	GTEx Tissue Sample Gene Expression Profiles	-1	-1.58838
H3K4me3_fibroblast of lung_hg19_7	ENCODE Histone Modification Site Profiles	1	null
MAX_MCF-7_hg19_2	ENCODE Transcription Factor Binding Site Profiles	1	null
GTEX-NFK9-0926-SM-2HMJU	GTEx Tissue Sample Gene Expression Profiles	-1	-0.966239
H3K4me3_CD14-positive monocyte_hg19_2	ENCODE Histone Modification Site Profiles	1	null
CREB1	ENCODE Transcription Factor Targets	1	null
mononuclear phagocyte	TISSUES Text-mining Tissue Protein Expression Evidence Scores	1	0.126895
pontine nucleus	Allen Brain Atlas Prenatal Human Brain Tissue Gene Expression Profiles	-1	-0.835739
Cholestasis	CTD Gene-Disease Associations	1	1.21567
A-431	Klijn et al., Nat. Biotechnol., 2015 Cell Line Gene Expression Profiles	-1	-1.71651
SG in primary auditory cortex	Allen Brain Atlas Prenatal Human Brain Tissue Gene Expression Profiles	1	1.35212
HCC2157	CCLE Cell Line Gene CNV Profiles	1	1.43506
positive regulation of cell differentiation	GO Biological Process Annotations 2025	1	null
ABT-737	DeepCoverMOA Drug Mechanisms of Action	-1	-0.45
H3K4me1_A549_hg19_1	ENCODE Histone Modification Site Profiles	1	null
BHLHE40_HepG2_hg19_3	ENCODE Transcription Factor Binding Site Profiles	1	null
ZEB1	ENCODE Transcription Factor Targets	1	null
nucleus sagulum, deep part	Allen Brain Atlas Adult Mouse Brain Tissue Gene Expression Profiles	1	1.25073
CTCF_medulloblastoma_hg19_1	ENCODE Transcription Factor Binding Site Profiles	1	null
Brain Lower Grade Glioma_LGG_TCGA-DU-8165-01A-11R-2256-07	TCGA Signatures of Differentially Expressed Genes for Tumors	1	null
molt4	HPA Cell Line Gene Expression Profiles	-1	-2.20124
GTEX-U412-0008-SM-4DXTE	GTEx Tissue Sample Gene Expression Profiles	1	0.963534
TAF7	ENCODE Transcription Factor Targets	1	null
GTEX-WFJO-0005-SM-3GIKY	GTEx Tissue Sample Gene Expression Profiles	-1	-1.0035
outer SZ in superolateral temporal cortex	Allen Brain Atlas Prenatal Human Brain Tissue Gene Expression Profiles	-1	-1.32508
cytoplasmic part	COMPARTMENTS Curated Protein Localization Evidence Scores	1	0.03318
SIN3A_K562_hg19_2	ENCODE Transcription Factor Binding Site Profiles	1	null
hsa-miR-1343	TargetScan Predicted Nonconserved microRNA Targets	1	1.20993
decreased bone resorption	MGI Mouse Phenotype Associations 2023	1	null
PBX3	ENCODE Transcription Factor Targets	1	null
OC-314	COSMIC Cell Line Gene Mutation Profiles	1	null
TCF7L2_Panc1_hg19_1	ENCODE Transcription Factor Binding Site Profiles	1	null
MDAMB415	Heiser et al., PNAS, 2011 Cell Line Gene Expression Profiles	-1	-1.19793
bonemarrow_6c	HPA Tissue Sample Gene Expression Profiles	-1	-0.939203
Skin Cutaneous Melanoma_SKCM_TCGA-ER-A195-06A-11R-A18U-07	TCGA Signatures of Differentially Expressed Genes for Tumors	1	null
DND41	CCLE Cell Line Gene Expression Profiles	-1	-1.45498
POLR2A_MCF-7_hg19_2	ENCODE Transcription Factor Binding Site Profiles	1	null
MYC_NB4_hg19_1	ENCODE Transcription Factor Binding Site Profiles	1	null
GTEX-T6MO-0226-SM-32QOL	GTEx Tissue Sample Gene Expression Profiles	1	2.06637
MAX_MEL cell line_mm9_1	ENCODE Transcription Factor Binding Site Profiles	1	null
POLR2AphosphoS2_myocyte_mm9_1	ENCODE Transcription Factor Binding Site Profiles	1	null
Edema	CTD Gene-Disease Associations	1	1.24433
Cells - Cultured fibroblasts	GTEx Tissue Gene Expression Profiles 2023	1	1.59701
Liver Cirrhosis, Experimental	CTD Gene-Disease Associations	1	1.12323
Prostate adenocarcinoma_PRAD_TCGA-FC-7961-01A-11R-A29R-07	TCGA Signatures of Differentially Expressed Genes for Tumors	1	null
GATA2	ENCODE Transcription Factor Targets	1	null
Zonisamide	DeepCoverMOA Drug Mechanisms of Action	1	0.31
H3K4me3_ES-Bruce4_mm9_1	ENCODE Histone Modification Site Profiles	1	null
GTEX-TSE9-0005-SM-4DXUF	GTEx Tissue Sample Gene Expression Profiles	-1	-2.23607
Weight Loss	CTD Gene-Disease Associations	1	1.11775
SALL4-22934838-CD34+-HUMAN	ChEA Transcription Factor Targets 2022	1	null
hsa-miR-23a	TargetScan Predicted Conserved microRNA Targets	1	0.078844
MAX_HepG2_hg19_1	ENCODE Transcription Factor Binding Site Profiles	1	null
Pheochromocytoma and Paraganglioma_PCPG_TCGA-TT-A6YO-01A-11R-A35L-07	TCGA Signatures of Differentially Expressed Genes for Tumors	1	null
TEAD4_K562_hg19_2	ENCODE Transcription Factor Binding Site Profiles	1	null
POLR2A_HeLa-S3_hg19_3	ENCODE Transcription Factor Binding Site Profiles	1	null
NCI-H1355	Klijn et al., Nat. Biotechnol., 2015 Cell Line Gene Expression Profiles	1	0.832704
Retrosplenial area, ventral part, layer 6b	Allen Brain Atlas Adult Mouse Brain Tissue Gene Expression Profiles	1	1.2071
JUND_H1-hESC_hg19_3	ENCODE Transcription Factor Binding Site Profiles	1	null
ChIP_TRIM28_19339689	ESCAPE Omics Signatures of Genes and Proteins for Stem Cells	1	null
H3K27ac_K562_hg19_1	ENCODE Histone Modification Site Profiles	1	null
gata3_21892208_mda_mb_231_gof_human_gpl570_gds4080	GEO Signatures of Differentially Expressed Genes for Transcription Factor Perturbations	1	0.35489
GTEX-V955-1226-SM-4JBI9	GTEx Tissue Sample Gene Expression Profiles	1	0.828124
H3K4me2_H1 BMP4 Derived Trophoblast Cultured Cells	Roadmap Epigenomics Histone Modification Site Profiles	1	null
H3K27me3_CH12.LX_mm9_1	ENCODE Transcription Factor Binding Site Profiles	1	null
TCF3-18467660-MESC-MOUSE	ChEA Transcription Factor Binding Site Profiles	1	null
SMRT-27268052-CHIP-SEQ-BCELLS-HUMAN	ChEA Transcription Factor Targets 2022	1	null
orbital frontal cortex_10 mos_M_12977	Allen Brain Atlas Developing Human Brain Tissue Gene Expression Profiles by RNA-seq	1	1.11196
H3K4me3_WERI-Rb-1_hg19_2	ENCODE Histone Modification Site Profiles	1	null
outer SZ in medial temporal-occipital cortex	Allen Brain Atlas Prenatal Human Brain Tissue Gene Expression Profiles	-1	-1.37591
TBX20-22328084-HEART-MOUSE	ChEA Transcription Factor Targets 2022	1	null
NFIC_ECC-1_hg19_2	ENCODE Transcription Factor Binding Site Profiles	1	null
ZNF217-24962896-MCF-7-HUMAN	ChEA Transcription Factor Targets 2022	1	null
GTEX-P4PQ-2626-SM-33HC9	GTEx Tissue Sample Gene Expression Profiles	1	1.54478
abnormal osteoclast differentiation	MPO Gene-Phenotype Associations	1	null
GATA1_K562_hg19_2	ENCODE Transcription Factor Binding Site Profiles	1	null
POLR2A_MCF 10A_hg19_1	ENCODE Transcription Factor Binding Site Profiles	1	null
H3K4me3_HCT116_hg19_1	ENCODE Histone Modification Site Profiles	1	null
ARID3A_K562_hg19_1	ENCODE Transcription Factor Binding Site Profiles	1	null
POLR2AphosphoS5_MEL cell line_mm9_1	ENCODE Transcription Factor Binding Site Profiles	1	null
roof plate of p2 (epithalamic roofplate)	Allen Brain Atlas Adult Mouse Brain Tissue Gene Expression Profiles	1	2.39614
hsa-miR-188-3p	TargetScan Predicted Conserved microRNA Targets	1	0.283838
GTEX-NL3H-0006-SM-2I3FW	GTEx Tissue Sample Gene Expression Profiles	-1	-1.45662
melanoma cell line	TISSUES Curated Tissue Protein Expression Evidence Scores	1	null
GTEX-WOFM-0005-SM-3MJF3	GTEx Tissue Sample Gene Expression Profiles	-1	-1.91598
MAFK_IMR-90_hg19_1	ENCODE Transcription Factor Binding Site Profiles	1	null
Abnormalities, Drug-Induced	CTD Gene-Disease Associations	1	1.34111
GTEX-PVOW-0006-SM-3NMB8	GTEx Tissue Sample Gene Expression Profiles	-1	-3.0191
EFM-19	Klijn et al., Nat. Biotechnol., 2015 Cell Line Gene Expression Profiles	-1	-2.35484
hsa-miR-3942-3p	TargetScan Predicted Nonconserved microRNA Targets	1	1.2992
r9 portion of ambiguous motor nucleus (postmigratory)	Allen Brain Atlas Adult Mouse Brain Tissue Gene Expression Profiles	-1	-1.68308
H3K9me3_T-cell acute lymphoblastic leukemia_hg19_1	ENCODE Histone Modification Site Profiles	1	null
GTEX-WHSE-0011-R6A-SM-3P5ZP	GTEx Tissue Sample Gene Expression Profiles	-1	-0.912151
rnf2_20805357_u2os_osteosarcoma_lof_human_gpl570_gse23035	GEO Signatures of Differentially Expressed Genes for Transcription Factor Perturbations	1	0.557746
CEBPD	ENCODE Transcription Factor Targets	1	null
hsa-miR-548d-3p	TargetScan Predicted Nonconserved microRNA Targets	1	0.843347
GTEX-X5EB-2426-SM-4E3HX	GTEx Tissue Sample Gene Expression Profiles	1	2.07686
abnormal bone trabecula morphology	MGI Mouse Phenotype Associations 2023	1	null
H3K27ac_osteoblast_hg19_1	ENCODE Histone Modification Site Profiles	1	null
Posterior parietal association areas, layer 1	Allen Brain Atlas Adult Mouse Brain Tissue Gene Expression Profiles	-1	-1.09438
Piriform-amygdalar area, molecular layer	Allen Brain Atlas Adult Mouse Brain Tissue Gene Expression Profiles	-1	-1.52649
GTEX-NPJ8-0426-SM-2HMK6	GTEx Tissue Sample Gene Expression Profiles	-1	-0.913803
H3K4me3_lung_mm9_1	ENCODE Histone Modification Site Profiles	1	null
CTCF_A549_hg19_1	ENCODE Transcription Factor Binding Site Profiles	1	null
r4 part of descending trigeminal sensory nucleus, oral part	Allen Brain Atlas Adult Mouse Brain Tissue Gene Expression Profiles	-1	-1.56703
H3K4me3_cardiac mesoderm_hg19_6	ENCODE Histone Modification Site Profiles	1	null
USF2_HepG2_hg19_1	ENCODE Transcription Factor Binding Site Profiles	1	null
Quizartinib	DeepCoverMOA Drug Mechanisms of Action	-1	-0.47
Acute Myeloid Leukemia_LAML_TCGA-AB-2917-03A-01T-0734-13	TCGA Signatures of Differentially Expressed Genes for Tumors	1	null
SG in temporal polar cortex	Allen Brain Atlas Prenatal Human Brain Tissue Gene Expression Profiles	1	1.16529
HCC70	Klijn et al., Nat. Biotechnol., 2015 Cell Line Gene CNV Profiles	1	1.04141
MT-3	Klijn et al., Nat. Biotechnol., 2015 Cell Line Gene Mutation Profiles	1	null
abnormal hematopoiesis	MPO Gene-Phenotype Associations	1	null
Brain Lower Grade Glioma_LGG_TCGA-KT-A7W1-01A-11R-A34F-07	TCGA Signatures of Differentially Expressed Genes for Tumors	1	null
positive regulation of fat cell differentiation	GO Biological Process Annotations 2023	1	null
CTCF_astrocyte of the cerebellum_hg19_2	ENCODE Transcription Factor Binding Site Profiles	1	null
GATA3-21867929-CD8-MOUSE	ChEA Transcription Factor Targets 2022	1	null
H3K4me2_astrocyte_hg19_1	ENCODE Histone Modification Site Profiles	1	null
POLR2A_lung_mm9_1	ENCODE Transcription Factor Binding Site Profiles	1	null
nucleus subceruleus, right	Allen Brain Atlas Adult Human Brain Tissue Gene Expression Profiles	1	0.925374
H3K4me3_brain microvascular endothelial cell_hg19_1	ENCODE Histone Modification Site Profiles	1	null
positive regulation of leukocyte differentiation	GO Biological Process Annotations 2015	1	null
H3K18ac_IMR90	Roadmap Epigenomics Histone Modification Site Profiles	1	null
hsa-miR-520b	TargetScan Predicted Conserved microRNA Targets	1	0.389112
W-13 HCl	DeepCoverMOA Drug Mechanisms of Action	-1	-0.5
Liver hepatocellular carcinoma_LIHC_TCGA-DD-A1EL-01A-11R-A155-07	TCGA Signatures of Differentially Expressed Genes for Tumors	1	null
RAD21	ENCODE Transcription Factor Targets	1	null
GTEX-NPJ8-0011-R11A-SM-2YUMS	GTEx Tissue Sample Gene Expression Profiles	-1	-0.901778
nucleus of the central acoustic tract	Allen Brain Atlas Adult Mouse Brain Tissue Gene Expression Profiles	-1	-1.78666
Urogenital Abnormalities	CTD Gene-Disease Associations	1	1.25494
RSV-A2_24Hour-KO_RSV_None_GSE18170	GEO Signatures of Differentially Expressed Genes for Viral Infections	-1	-2.10522
hsa-miR-455-3p	TargetScan Predicted Conserved microRNA Targets	1	0.159923
EBF1	ENCODE Transcription Factor Targets	1	null
KMS20	DepMap CRISPR Gene Dependency	1	2.62116
Head and Neck squamous cell carcinoma_HNSC_TCGA-UF-A7JA-01A-12R-A34R-07	TCGA Signatures of Differentially Expressed Genes for Tumors	1	null
membrane	LOCATE Predicted Protein Localization Annotations	1	null
gracile nucleus, right	Allen Brain Atlas Adult Human Brain Tissue Gene Expression Profiles	1	1.27273
MV-4-11	Klijn et al., Nat. Biotechnol., 2015 Cell Line Gene Expression Profiles	-1	-0.872442
hsa-miR-3617	TargetScan Predicted Nonconserved microRNA Targets	1	1.0155
MAX_MCF-7_hg19_1	ENCODE Transcription Factor Binding Site Profiles	1	null
CHD2_CH12.LX_mm9_1	ENCODE Transcription Factor Binding Site Profiles	1	null
MM160113	DepMap CRISPR Gene Dependency	1	3.02317
Liver Neoplasms, Experimental	CTD Gene-Disease Associations	1	1.33909
GTEX-SNOS-0006-SM-32PLH	GTEx Tissue Sample Gene Expression Profiles	-1	-1.21663
hsa-miR-548ab	TargetScan Predicted Nonconserved microRNA Targets	1	1.2992
GTF2F1_H1-hESC_hg19_1	ENCODE Transcription Factor Binding Site Profiles	1	null
hsa-miR-302c	TargetScan Predicted Conserved microRNA Targets	1	0.348832
negative regulation of canonical Wnt signaling pathway	GO Biological Process Annotations 2023	1	null
H3K4me1_Penis Foreskin Keratinocyte Primary Cells	Roadmap Epigenomics Histone Modification Site Profiles	1	null
hsa-miR-4328	TargetScan Predicted Conserved microRNA Targets	1	0.598666
HOUAI	DepMap CRISPR Gene Dependency	1	3.95458
mRNA_SUZ12_17339329	ESCAPE Omics Signatures of Genes and Proteins for Stem Cells	-1	null
Embryo Loss	CTD Gene-Disease Associations	1	1.10069
hsa-miR-302b	TargetScan Predicted Conserved microRNA Targets	1	0.348832
CTCF_WERI-Rb-1_hg19_1	ENCODE Transcription Factor Binding Site Profiles	1	null
Cortical amygdalar area, anterior part, layer 1	Allen Brain Atlas Adult Mouse Brain Tissue Gene Expression Profiles	-1	-1.63657
TAF1_K562_hg19_2	ENCODE Transcription Factor Binding Site Profiles	1	null
Pancreatic adenocarcinoma_PAAD_TCGA-S4-A8RO-01A-12R-A37L-07	TCGA Signatures of Differentially Expressed Genes for Tumors	1	null
TAF7_H1-hESC_hg19_2	ENCODE Transcription Factor Binding Site Profiles	1	null
GTEX-N7MT-0007-SM-3GACQ	GTEx Tissue Sample Gene Expression Profiles	-1	-0.92346
regulation of cytosolic calcium ion concentration	GO Biological Process Annotations 2025	1	null
Liver Failure, Acute	CTD Gene-Disease Associations	1	1.03345
Brain_Germinal_Matrix	Roadmap Epigenomics Cell and Tissue Gene Expression Profiles	-1	-2.70785
CTCF_fibroblast of villous mesenchyme_hg19_1	ENCODE Transcription Factor Binding Site Profiles	1	null
SIN3A_H1-hESC_hg19_3	ENCODE Transcription Factor Binding Site Profiles	1	null
GTEX-TML8-0005-SM-32QPA	GTEx Tissue Sample Gene Expression Profiles	-1	-1.8502
MYC_K562_hg19_3	ENCODE Transcription Factor Binding Site Profiles	1	null
CA1 field, left	Allen Brain Atlas Adult Human Brain Tissue Gene Expression Profiles	-1	-1.3803
Kidney - Medulla	GTEx Tissue Gene Expression Profiles 2023	-1	-1.38875
PBX3_SK-N-SH_hg19_1	ENCODE Transcription Factor Binding Site Profiles	1	null
MYC_MCF-7_hg19_3	ENCODE Transcription Factor Binding Site Profiles	1	null
integument	TISSUES Curated Tissue Protein Expression Evidence Scores	1	null
NB-598	DeepCoverMOA Drug Mechanisms of Action	1	0.65
Brain Lower Grade Glioma_LGG_TCGA-HT-7473-01A-11R-2027-07	TCGA Signatures of Differentially Expressed Genes for Tumors	1	null
GTEX-U3ZH-0005-SM-3DB72	GTEx Tissue Sample Gene Expression Profiles	-1	-1.21072
CTCF_SK-N-SH_hg19_2	ENCODE Transcription Factor Binding Site Profiles	1	null
COV644	Klijn et al., Nat. Biotechnol., 2015 Cell Line Gene Expression Profiles	-1	-0.839182
H3K4me3_CH12.LX_mm9_2	ENCODE Histone Modification Site Profiles	1	null
hematopoietic system	TISSUES Text-mining Tissue Protein Expression Evidence Scores	1	0.053999
OVSAHO	Klijn et al., Nat. Biotechnol., 2015 Cell Line Gene CNV Profiles	-1	-0.922472
thyroid_5d	HPA Tissue Sample Gene Expression Profiles	1	1.79856
ventrolateral prefrontal cortex_4 mos_M_12889	Allen Brain Atlas Developing Human Brain Tissue Gene Expression Profiles by RNA-seq	-1	-1.0077
GP5D	Klijn et al., Nat. Biotechnol., 2015 Cell Line Gene Mutation Profiles	1	null
MYOG	ENCODE Transcription Factor Targets	1	null
GTEX-S32W-2226-SM-2XCAY	GTEx Tissue Sample Gene Expression Profiles	1	0.943801
H3K14ac_H1	Roadmap Epigenomics Histone Modification Site Profiles	1	null
JZL 184	DeepCoverMOA Drug Mechanisms of Action	-1	-0.26
HCC2279	Klijn et al., Nat. Biotechnol., 2015 Cell Line Gene CNV Profiles	-1	-1.89857
CTCF_fibroblast of lung_hg19_4	ENCODE Transcription Factor Binding Site Profiles	1	null
Proteinuria	CTD Gene-Disease Associations	1	1.22436
hsa-miR-548b-5p	TargetScan Predicted Nonconserved microRNA Targets	1	1.40969
valproic acid_mus musculus_gpl1261_gds3002	GEO Signatures of Differentially Expressed Genes for Small Molecules	1	null
GTEX-X4XX-0008-SM-46MVK	GTEx Tissue Sample Gene Expression Profiles	1	1.16338
SNU626	CCLE Cell Line Gene CNV Profiles	-1	-1.58003
Mesothelioma_MESO_TCGA-MQ-A4LJ-01A-11R-A34F-07	TCGA Signatures of Differentially Expressed Genes for Tumors	1	null
Pyramus (VIII), molecular layer	Allen Brain Atlas Adult Mouse Brain Tissue Gene Expression Profiles	1	1.32035
cerebellar vermis	Allen Brain Atlas Adult Mouse Brain Tissue Gene Expression Profiles	1	1.39766
H3K4me3_skeletal muscle cell_hg19_1	ENCODE Histone Modification Site Profiles	1	null
MAX_CH12.LX_mm9_1	ENCODE Transcription Factor Binding Site Profiles	1	null
hematopoietic cell	TISSUES Text-mining Tissue Protein Expression Evidence Scores	1	0.054986
Milrinone	DeepCoverMOA Drug Mechanisms of Action	1	0.42
GTEX-X5EB-0726-SM-46MVR	GTEx Tissue Sample Gene Expression Profiles	1	1.26407
CTCF_fibroblast of lung_hg19_3	ENCODE Transcription Factor Binding Site Profiles	1	null
GATA2_endothelial cell of umbilical vein_hg19_1	ENCODE Transcription Factor Binding Site Profiles	1	null
MBD3-35695185-NICBASALROOTGANGLIA-MOUSE-EMBRYO	ChEA Transcription Factor Targets 2022	1	null
NCI-H2171	Klijn et al., Nat. Biotechnol., 2015 Cell Line Gene CNV Profiles	-1	-1.44078
monocyte	TISSUES Text-mining Tissue Protein Expression Evidence Scores	1	0.129431
Balicatib	DeepCoverMOA Drug Mechanisms of Action	-1	-0.27
r4 part of lateral vestibular nucleus	Allen Brain Atlas Adult Mouse Brain Tissue Gene Expression Profiles	-1	-1.01493
EGR1_K562_hg19_1	ENCODE Transcription Factor Binding Site Profiles	1	null
PML_MCF-7_hg19_2	ENCODE Transcription Factor Binding Site Profiles	1	null
inner SZ in caudal midinferior temporal cortex (area TF)	Allen Brain Atlas Prenatal Human Brain Tissue Gene Expression Profiles	-1	-1.35322
mantle zone of Ist	Allen Brain Atlas Adult Mouse Brain Tissue Gene Expression Profiles	1	1.27877
PC-3	Klijn et al., Nat. Biotechnol., 2015 Cell Line Gene CNV Profiles	1	1.42303
hsa-miR-448	TargetScan Predicted Conserved microRNA Targets	1	0.436802
HUCCT1	DepMap CRISPR Gene Dependency	1	4.76602
18535662-TableS2a	GeneSigDB Published Gene Signatures	1	null
CTCF_MCF-7_hg19_9	ENCODE Transcription Factor Binding Site Profiles	1	null
TAF1_SK-N-SH_hg19_2	ENCODE Transcription Factor Binding Site Profiles	1	null
hsa-miR-3117-5p	TargetScan Predicted Nonconserved microRNA Targets	1	1.0155
H3K4me2_CH12.LX_mm9_1	ENCODE Histone Modification Site Profiles	1	null
BACH1_H1-hESC_hg19_1	ENCODE Transcription Factor Binding Site Profiles	1	null
H2AFZ_K562_hg19_1	ENCODE Transcription Factor Binding Site Profiles	1	null
LP1	DepMap CRISPR Gene Dependency	1	2.21174
Kidney renal papillary cell carcinoma_KIRP_TCGA-A4-8630-01A-11R-2404-07	TCGA Signatures of Differentially Expressed Genes for Tumors	1	null
PBX1	ChEA Transcription Factor Targets	1	null
hsa-miR-548d-5p	TargetScan Predicted Nonconserved microRNA Targets	1	1.2992
POLR2A_GM12892_hg19_2	ENCODE Transcription Factor Binding Site Profiles	1	null
HCC1428	CCLE Cell Line Gene CNV Profiles	1	1.84171
DMRT1	ChEA Transcription Factor Targets	1	null
USF2_K562_hg19_1	ENCODE Transcription Factor Binding Site Profiles	1	null
SIRT6_K562_hg19_1	ENCODE Transcription Factor Binding Site Profiles	1	null
H2AFZ_myotube_hg19_1	ENCODE Transcription Factor Binding Site Profiles	1	null
Memory Disorders	CTD Gene-Disease Associations	1	1.06588
BHLHE40_CH12.LX_mm9_1	ENCODE Transcription Factor Binding Site Profiles	1	null
abnormal myeloid leukocyte morphology	MPO Gene-Phenotype Associations	1	null
H3K4me3_H7_hg19_2	ENCODE Histone Modification Site Profiles	1	null
YY1_K562_hg19_4	ENCODE Transcription Factor Binding Site Profiles	1	null
substantia nigra, pars reticulata, right	Allen Brain Atlas Adult Human Brain Tissue Gene Expression Profiles	1	1.18117
H3K4me1_H1 Derived Mesenchymal Stem Cells	Roadmap Epigenomics Histone Modification Site Profiles	1	null
NCIH2171	CCLE Cell Line Gene CNV Profiles	-1	-1.42625
THAP1_K562_hg19_2	ENCODE Transcription Factor Binding Site Profiles	1	null
ELF1_GM12878_hg19_1	ENCODE Transcription Factor Binding Site Profiles	1	null
GTEX-XUZC-1226-SM-4BRVJ	GTEx Tissue Sample Gene Expression Profiles	1	1.44413
JEKO-1	Klijn et al., Nat. Biotechnol., 2015 Cell Line Gene CNV Profiles	-1	-1.44132
chemical homeostasis	GO Biological Process Annotations 2015	1	null
MAFK_HeLa-S3_hg19_1	ENCODE Transcription Factor Binding Site Profiles	1	null
subthalamic nucleus, left	Allen Brain Atlas Adult Human Brain Tissue Gene Expression Profiles	1	0.999029
mammalian phenotype	MPO Gene-Phenotype Associations	1	null
GTEX-REY6-0326-SM-2TF5A	GTEx Tissue Sample Gene Expression Profiles	1	0.846899
parolfactory gyri, right	Allen Brain Atlas Adult Human Brain Tissue Gene Expression Profiles	-1	-1.00682
hsa-miR-524-5p	TargetScan Predicted Conserved microRNA Targets	1	0.075559
CTCF_Caco-2_hg19_1	ENCODE Transcription Factor Binding Site Profiles	1	null
GTEX-RVPV-0011-R11A-SM-2TF6F	GTEx Tissue Sample Gene Expression Profiles	-1	-1.22144
outer CP in subgenual (subcallosal) cingulate cortex	Allen Brain Atlas Prenatal Human Brain Tissue Gene Expression Profiles	1	1.19646
Bladder Urothelial Carcinoma_BLCA_TCGA-GV-A3JW-01A-11R-A20F-07	TCGA Signatures of Differentially Expressed Genes for Tumors	1	null
ELF1_K562_hg19_2	ENCODE Transcription Factor Binding Site Profiles	1	null
Rectum adenocarcinoma_READ_TCGA-AG-3742-11A-01R-1660-07	TCGA Signatures of Differentially Expressed Genes for Tumors	1	null
positive regulation of osteoclast differentiation	GO Biological Process Annotations 2025	1	null
orbital frontal cortex_11 yrs_F_12289	Allen Brain Atlas Developing Human Brain Tissue Gene Expression Profiles by RNA-seq	1	1.60755
HDAC2_MCF-7_hg19_1	ENCODE Transcription Factor Binding Site Profiles	1	null
regulation of osteoblast differentiation	GO Biological Process Annotations 2023	1	null
H3K4me3_myotube_hg19_1	ENCODE Histone Modification Site Profiles	1	null
NCI-H1838	Klijn et al., Nat. Biotechnol., 2015 Cell Line Gene Expression Profiles	-1	-3.33551
JJN-3	Klijn et al., Nat. Biotechnol., 2015 Cell Line Gene Expression Profiles	1	1.36785
NSC95682	DeepCoverMOA Drug Mechanisms of Action	1	0.37
myeloid progenitor cell	TISSUES Text-mining Tissue Protein Expression Evidence Scores	1	0.099217
Brain Lower Grade Glioma_LGG_TCGA-DU-7290-01A-11R-2027-07	TCGA Signatures of Differentially Expressed Genes for Tumors	1	null
H3K4me3_fibroblast of skin of abdomen_hg19_2	ENCODE Histone Modification Site Profiles	1	null
H3K27me3_cardiac mesoderm_hg19_5	ENCODE Transcription Factor Binding Site Profiles	1	null
E2F6_H1-hESC_hg19_2	ENCODE Transcription Factor Binding Site Profiles	1	null
JK1	CCLE Cell Line Gene Expression Profiles	1	2.12243
GTEX-XMK1-0626-SM-4B65A	GTEx Tissue Sample Gene Expression Profiles	1	0.964894
GTEX-PW2O-0008-SM-48TEB	GTEx Tissue Sample Gene Expression Profiles	1	2.06537
GTEX-SJXC-0726-SM-2XCFJ	GTEx Tissue Sample Gene Expression Profiles	1	1.95144
Brain Lower Grade Glioma_LGG_TCGA-DU-7007-01A-11R-2027-07	TCGA Signatures of Differentially Expressed Genes for Tumors	1	null
Crus II, left, lateral hemisphere	Allen Brain Atlas Adult Human Brain Tissue Gene Expression Profiles	-1	-1.04641
EZH2_HepG2_hg19_1	ENCODE Transcription Factor Binding Site Profiles	1	null
hsa-miR-20a	TargetScan Predicted Conserved microRNA Targets	1	0.997906
Sarcoma_SARC_TCGA-VT-A80G-01A-11R-A36F-07	TCGA Signatures of Differentially Expressed Genes for Tumors	1	null
CTCF_fibroblast of mammary gland_hg19_1	ENCODE Transcription Factor Binding Site Profiles	1	null
MCF7	CCLE Cell Line Gene CNV Profiles	1	1.95895
GTEX-RVPU-0011-R3A-SM-2XCAE	GTEx Tissue Sample Gene Expression Profiles	-1	-1.22448
FOXM1_GM12878_hg19_2	ENCODE Transcription Factor Binding Site Profiles	1	null
GATA2	JASPAR Predicted Transcription Factor Targets	1	null
COR-L88	Klijn et al., Nat. Biotechnol., 2015 Cell Line Gene CNV Profiles	1	0.907694
GTEX-W5X1-0008-SM-4LMKA	GTEx Tissue Sample Gene Expression Profiles	1	1.10954
GTEX-WHPG-0006-SM-3NMBV	GTEx Tissue Sample Gene Expression Profiles	-1	-1.36273
Fetal_Brain_Female	Roadmap Epigenomics Cell and Tissue Gene Expression Profiles	-1	-1.22776
hsa-miR-4672	TargetScan Predicted Nonconserved microRNA Targets	1	1.07142
HJC0350	DeepCoverMOA Drug Mechanisms of Action	-1	-0.27
H3K4me3_kidney_mm9_1	ENCODE Histone Modification Site Profiles	1	null
esophagus	HPA Tissue Protein Expression Profiles	-1	-1.00606
RAD21_ECC-1_hg19_1	ENCODE Transcription Factor Binding Site Profiles	1	null
20077526-TableS3	GeneSigDB Published Gene Signatures	1	null
TCF3	ChEA Transcription Factor Targets	1	null
RAD21_CH12.LX_mm9_1	ENCODE Transcription Factor Binding Site Profiles	1	null
GTEX-S33H-0005-SM-2XCAL	GTEx Tissue Sample Gene Expression Profiles	-1	-1.08184
CTCF_GM12865_hg19_1	ENCODE Transcription Factor Binding Site Profiles	1	null
NCIH716	DepMap CRISPR Gene Dependency	1	2.08795
HCC2185	Heiser et al., PNAS, 2011 Cell Line Gene Expression Profiles	-1	-1.2699
smoothmuscle_8b	HPA Tissue Sample Gene Expression Profiles	1	2.28315
Primary somatosensory area, barrel field, layer 1	Allen Brain Atlas Adult Mouse Brain Tissue Gene Expression Profiles	-1	-2.34837
doxorubicin_homo sapiens_gpl10558_gse42531	GEO Signatures of Differentially Expressed Genes for Small Molecules	1	null
GTEX-P4PQ-0005-SM-2HMKJ	GTEx Tissue Sample Gene Expression Profiles	-1	-1.31488
POLR2AphosphoS2_HepG2_hg19_1	ENCODE Transcription Factor Binding Site Profiles	1	null
decreased hematopoietic cell number	MPO Gene-Phenotype Associations	1	null
GTEX-QDVN-0006-SM-48U1R	GTEx Tissue Sample Gene Expression Profiles	-1	-1.6991
GTEX-P4QR-0006-SM-2I5GN	GTEx Tissue Sample Gene Expression Profiles	-1	-1.42116
reticular nucleus of thalamus, right	Allen Brain Atlas Adult Human Brain Tissue Gene Expression Profiles	1	1.7094
PBX1-22567123-OVCAR3-HUMAN	ChEA Transcription Factor Targets 2022	1	null
TET1-21451524-MESC-MOUSE	ChEA Transcription Factor Binding Site Profiles	1	null
MYC_K562_hg19_6	ENCODE Transcription Factor Binding Site Profiles	1	null
KLF4-18555785-MESCS-MOUSE	ChEA Transcription Factor Targets 2022	1	null
LU99	CCLE Cell Line Gene CNV Profiles	1	1.5495
decreased bone resorption	MPO Gene-Phenotype Associations	1	null
negative regulation of osteoblast differentiation	GO Biological Process Annotations 2023	1	null
cellular_component	COMPARTMENTS Text-mining Protein Localization Evidence Scores	1	0.04068
JUN	ENCODE Transcription Factor Targets	1	null
GTEX-X4XY-0826-SM-4E3JM	GTEx Tissue Sample Gene Expression Profiles	1	1.10618
primary somatosensory cortex (area S1, areas 3,1,2)_11 yrs_F_12289	Allen Brain Atlas Developing Human Brain Tissue Gene Expression Profiles by RNA-seq	1	1.6139
CTCF_BE2C_hg19_1	ENCODE Transcription Factor Binding Site Profiles	1	null
SNU-484	Klijn et al., Nat. Biotechnol., 2015 Cell Line Gene Expression Profiles	-1	-1.17671
MYC_MCF 10A_hg19_2	ENCODE Transcription Factor Binding Site Profiles	1	null
Pheochromocytoma and Paraganglioma_PCPG_TCGA-WB-A820-01A-11R-A35L-07	TCGA Signatures of Differentially Expressed Genes for Tumors	1	null
Alfuzosin	DeepCoverMOA Drug Mechanisms of Action	1	0.35
TR-14035	DeepCoverMOA Drug Mechanisms of Action	-1	-0.3
Vermal regions	Allen Brain Atlas Adult Mouse Brain Tissue Gene Expression Profiles	1	1.54074
POLR2A_HGPS cell_hg19_1	ENCODE Transcription Factor Binding Site Profiles	1	null
blood	TISSUES Text-mining Tissue Protein Expression Evidence Scores	1	0.054598
ELK1_GM12878_hg19_1	ENCODE Transcription Factor Binding Site Profiles	1	null
hsa-miR-3616-5p	TargetScan Predicted Conserved microRNA Targets	1	0.085563
Fallopian Tube	GTEx Tissue Gene Expression Profiles 2023	-1	-1.37227
GTEX-T2IS-0626-SM-32QP6	GTEx Tissue Sample Gene Expression Profiles	1	1.35504
superficial stratum of r2Tr	Allen Brain Atlas Adult Mouse Brain Tissue Gene Expression Profiles	-1	-1.0463
dorsolateral prefrontal cortex_16 pcw_M_12879	Allen Brain Atlas Developing Human Brain Tissue Gene Expression Profiles by RNA-seq	1	1.02735
CEBPB_MCF-7_hg19_1	ENCODE Transcription Factor Binding Site Profiles	1	null
dactinomycin_mus musculus_gpl6246_gse21233	GEO Signatures of Differentially Expressed Genes for Small Molecules	1	null
internal male genital organ	TISSUES Curated Tissue Protein Expression Evidence Scores	1	null
GATA4-21415370-HL-1-MOUSE	ChEA Transcription Factor Targets 2022	1	null
POLR2A_HepG2_hg19_3	ENCODE Transcription Factor Binding Site Profiles	1	null
GTEX-OHPK-0006-SM-2HMKH	GTEx Tissue Sample Gene Expression Profiles	-1	-2.28867
CTCF_epithelial cell of esophagus_hg19_1	ENCODE Transcription Factor Binding Site Profiles	1	null
KU812	Klijn et al., Nat. Biotechnol., 2015 Cell Line Gene CNV Profiles	1	1.06512
NCIH1568	CCLE Cell Line Gene CNV Profiles	1	1.44577
hsa-miR-3944-5p	TargetScan Predicted Conserved microRNA Targets	1	0.541706
EFM-192A	COSMIC Cell Line Gene CNV Profiles	1	2.06989
r7 part of trigeminal transition zone	Allen Brain Atlas Adult Mouse Brain Tissue Gene Expression Profiles	-1	-1.76136
H3K27ac_IMR90	Roadmap Epigenomics Histone Modification Site Profiles	1	null
H3K4me3_retinal pigment epithelial cell_hg19_1	ENCODE Histone Modification Site Profiles	1	null
FOXO1_KO_GSE40655_481_mouse_T reg	GEO Signatures of Differentially Expressed Genes for Gene Perturbations	-1	null
MXI1_HepG2_hg19_1	ENCODE Transcription Factor Binding Site Profiles	1	null
Lung squamous cell carcinoma_LUSC_TCGA-56-7221-01A-11R-2045-07	TCGA Signatures of Differentially Expressed Genes for Tumors	1	null
positive regulation of myeloid leukocyte differentiation	GO Biological Process Annotations 2015	1	null
NCI-H1648	Klijn et al., Nat. Biotechnol., 2015 Cell Line Gene Expression Profiles	-1	-0.827375
H3K27me3_cardiac mesoderm_hg19_6	ENCODE Transcription Factor Binding Site Profiles	1	null
AM095	DeepCoverMOA Drug Mechanisms of Action	1	0.51
valproic acid_mus musculus_gpl6885_gse41020	GEO Signatures of Differentially Expressed Genes for Small Molecules	1	null
SALL4-18804426-MESCS-MOUSE	ChEA Transcription Factor Targets 2022	1	null
PMC4202272__F1	PFOCR Pathway Figure Associations 2024	1	null
hsa-miR-4717-5p	TargetScan Predicted Conserved microRNA Targets	1	0.123298
PTBP1_02_131	KnockTF Gene Expression Profiles with Transcription Factor Perturbations	-1	-0.60829
REST_neural cell_hg19_1	ENCODE Transcription Factor Binding Site Profiles	1	null
EP300_K562_hg19_3	ENCODE Transcription Factor Binding Site Profiles	1	null
Lymphoid Neoplasm Diffuse Large B-cell Lymphoma_DLBC_TCGA-GR-A4D4-01A-11R-A31O-07	TCGA Signatures of Differentially Expressed Genes for Tumors	1	null
SMAD3_01_352	KnockTF Gene Expression Profiles with Transcription Factor Perturbations	-1	-0.65985
MYC_MCF-7_hg19_1	ENCODE Transcription Factor Binding Site Profiles	1	null
GTEX-RWS6-0726-SM-47JXI	GTEx Tissue Sample Gene Expression Profiles	1	0.844961
Nucleus of the lateral lemniscus, dorsal part	Allen Brain Atlas Adult Mouse Brain Tissue Gene Expression Profiles	1	1.02063
anterior (rostral) cingulate (medial prefrontal) cortex_18 yrs_M_12984	Allen Brain Atlas Developing Human Brain Tissue Gene Expression Profiles by RNA-seq	-1	-1.9528
decreased osteoclast cell number	MPO Gene-Phenotype Associations	1	null
Brain Lower Grade Glioma_LGG_TCGA-CS-6188-01A-11R-1896-07	TCGA Signatures of Differentially Expressed Genes for Tumors	1	null
hsa-miR-1291	TargetScan Predicted Conserved microRNA Targets	1	1.11641
GTEX-SUCS-0226-SM-32PLQ	GTEx Tissue Sample Gene Expression Profiles	1	0.87083
single-organism cellular process	GO Biological Process Annotations 2015	1	null
Kidney renal papillary cell carcinoma_KIRP_TCGA-BQ-7056-01A-11R-1965-07	TCGA Signatures of Differentially Expressed Genes for Tumors	1	null
membrane	COMPARTMENTS Curated Protein Localization Evidence Scores	1	0.098109
CTCF_retinal pigment epithelial cell_hg19_1	ENCODE Transcription Factor Binding Site Profiles	1	null
periventricular stratum of r2Ve	Allen Brain Atlas Adult Mouse Brain Tissue Gene Expression Profiles	-1	-1.02997
CTCF_MEL cell line_mm9_1	ENCODE Transcription Factor Binding Site Profiles	1	null
posterodorsal tegmental nucleus	Allen Brain Atlas Adult Mouse Brain Tissue Gene Expression Profiles	-1	-1.21245
bone	TISSUES Text-mining Tissue Protein Expression Evidence Scores	1	0.385896
Head and Neck squamous cell carcinoma_HNSC_TCGA-BA-4074-01A-01R-1436-07	TCGA Signatures of Differentially Expressed Genes for Tumors	1	null
H3K4me3_astrocyte of the cerebellum_hg19_2	ENCODE Histone Modification Site Profiles	1	null
POLR2AphosphoS5_G1E_mm9_2	ENCODE Transcription Factor Binding Site Profiles	1	null
inner SZ in ventromedial extrastriate cortex	Allen Brain Atlas Prenatal Human Brain Tissue Gene Expression Profiles	-1	-1.29677
Brain Lower Grade Glioma_LGG_TCGA-HT-7482-01A-11R-2027-07	TCGA Signatures of Differentially Expressed Genes for Tumors	1	null
primary auditory cortex (core)_11 yrs_F_12289	Allen Brain Atlas Developing Human Brain Tissue Gene Expression Profiles by RNA-seq	1	1.01178
MAX_ECC-1_hg19_2	ENCODE Transcription Factor Binding Site Profiles	1	null
USF2_HeLa-S3_hg19_1	ENCODE Transcription Factor Binding Site Profiles	1	null
CEBPB_HepG2_hg19_2	ENCODE Transcription Factor Binding Site Profiles	1	null
GTEX-R55C-0726-SM-48FCN	GTEx Tissue Sample Gene Expression Profiles	1	0.948005
laterodorsal nucleus	Allen Brain Atlas Adult Mouse Brain Tissue Gene Expression Profiles	-1	-1.58418
GTEX-XUZC-0008-SM-4BOQG	GTEx Tissue Sample Gene Expression Profiles	1	1.08263
A-Vietnam-1203_CIP048_RG4-2004(H5N1)NS1trunc124_2day-MOI-10^3_None_GSE44445	GEO Signatures of Differentially Expressed Genes for Viral Infections	-1	-1.90765
KAP1-27257070-CHIP-SEQ-ESCS-MOUSE	ChEA Transcription Factor Targets 2022	1	null
H3K4me3_fibroblast of lung_hg19_2	ENCODE Histone Modification Site Profiles	1	null
A-Vietnam-1203-2004(H5N1)_2day-TNFRSF1BKO_None_GSE40792	GEO Signatures of Differentially Expressed Genes for Viral Infections	-1	-1.88721
Lung adenocarcinoma_LUAD_TCGA-49-4512-11A-01R-1858-07	TCGA Signatures of Differentially Expressed Genes for Tumors	1	null
GTEX-SUCS-0006-SM-4DM59	GTEx Tissue Sample Gene Expression Profiles	-1	-1.27343
Medial amygdalar nucleus, posterodorsal part	Allen Brain Atlas Adult Mouse Brain Tissue Gene Expression Profiles	1	1.11398
cortex of cerebellar vermis	Allen Brain Atlas Adult Mouse Brain Tissue Gene Expression Profiles	1	1.44436
TBP_HeLa-S3_hg19_1	ENCODE Transcription Factor Binding Site Profiles	1	null
MOLM13	CCLE Cell Line Gene CNV Profiles	1	1.34967
H3K9ac_A549_hg19_1	ENCODE Histone Modification Site Profiles	1	null
Anemia	CTD Gene-Disease Associations	1	1.23169
cerebellar cortex_35 pcw_F_12295	Allen Brain Atlas Developing Human Brain Tissue Gene Expression Profiles by RNA-seq	-1	-2.8217
H3K4me3_keratinocyte_hg19_2	ENCODE Histone Modification Site Profiles	1	null
CTCF_A549_hg19_7	ENCODE Transcription Factor Binding Site Profiles	1	null
CTCF_WERI-Rb-1_hg19_2	ENCODE Transcription Factor Binding Site Profiles	1	null
NCI-H441	Klijn et al., Nat. Biotechnol., 2015 Cell Line Gene Expression Profiles	-1	-1.72036
H3K4me3_erythroblast_mm9_3	ENCODE Histone Modification Site Profiles	1	null
PBX3_GM12878_hg19_2	ENCODE Transcription Factor Binding Site Profiles	1	null
increased trabecular bone volume	MPO Gene-Phenotype Associations	1	null
superficial stratum of the IG	Allen Brain Atlas Adult Mouse Brain Tissue Gene Expression Profiles	1	1.65319
Crus I, right, paravermis	Allen Brain Atlas Adult Human Brain Tissue Gene Expression Profiles	-1	-1.51503
inferolateral temporal cortex (area TEv, area 20)_3 yrs_M_12980	Allen Brain Atlas Developing Human Brain Tissue Gene Expression Profiles by RNA-seq	-1	-0.841638
Brain Lower Grade Glioma_LGG_TCGA-HT-7680-01A-11R-2256-07	TCGA Signatures of Differentially Expressed Genes for Tumors	1	null
single-organism process	GO Biological Process Annotations 2015	1	null
H3K4me3_keratinocyte_hg19_1	ENCODE Histone Modification Site Profiles	1	null
H2AFZ_HeLa-S3_hg19_1	ENCODE Transcription Factor Binding Site Profiles	1	null
GTEX-WYJK-1626-SM-3NM9J	GTEx Tissue Sample Gene Expression Profiles	1	1.81398
GTEX-U8T8-0426-SM-3DB8X	GTEx Tissue Sample Gene Expression Profiles	1	0.980602
H3ac_C2C12_mm9_1	ENCODE Histone Modification Site Profiles	1	null
Pheochromocytoma and Paraganglioma_PCPG_TCGA-SQ-A6I4-11A-11R-A35L-07	TCGA Signatures of Differentially Expressed Genes for Tumors	1	null
hsa-miR-4795-3p	TargetScan Predicted Conserved microRNA Targets	1	0.034317
dorsolateral prefrontal cortex_10 mos_M_12977	Allen Brain Atlas Developing Human Brain Tissue Gene Expression Profiles by RNA-seq	1	1.10711
RERFLCSQ1	DepMap CRISPR Gene Dependency	1	2.18642
CTCF_SK-N-SH_hg19_3	ENCODE Transcription Factor Binding Site Profiles	1	null
E2F4_MCF 10A_hg19_1	ENCODE Transcription Factor Binding Site Profiles	1	null
GATA2-20887958-HPC-7-MOUSE	ChEA Transcription Factor Binding Site Profiles	1	null
YY1_ECC-1_hg19_2	ENCODE Transcription Factor Binding Site Profiles	1	null
CREB1_A549_hg19_1	ENCODE Transcription Factor Binding Site Profiles	1	null
CTCF_pancreas_hg19_1	ENCODE Transcription Factor Binding Site Profiles	1	null
H3K4me3_SK-N-MC_hg19_1	ENCODE Histone Modification Site Profiles	1	null
GR-M	Klijn et al., Nat. Biotechnol., 2015 Cell Line Gene CNV Profiles	-1	-0.922472
H3K4me1_mononuclear cell_hg19_1	ENCODE Histone Modification Site Profiles	1	null
hsa-miR-4676-3p	TargetScan Predicted Nonconserved microRNA Targets	1	0.809003
MEWO	CCLE Cell Line Gene Expression Profiles	1	1.56201
Boc-4mesyloxypiperidine	DeepCoverMOA Drug Mechanisms of Action	-1	-0.44
[truncated: 1,836 more rows]
